# Supplementary material
Source: PubMed Central journal article supplement (PMC3432695)

## Supplementary Material

### Synthesis, Chemical and Enzymatic Hydrolysis, and Aqueous Solubility of Amino Acid Ester Prodrugs of 3-Carboranyl Thymidine Analogues for Boron Neutron Capture Therapy of Brain Tumors

Sherifa Hasabelnaby,<sup>\*1,2</sup> Ayman Goudah,<sup>2,3</sup> Hitesh K. Agarwal,<sup>2</sup> Mosaad S. M. Abd alla,<sup>1</sup> and Werner Tjarks<sup>\*2</sup>

<sup>1</sup>*Division of Pharmaceutical Organic Chemistry, College of Pharmacy, Helwan University, Cairo, Egypt.*

<sup>2</sup>*Division of Medicinal Chemistry and Pharmacognosy, College of Pharmacy, The Ohio State University.*

<sup>3</sup>*Division of Pharmacology, College of Veterinary Medicine, Cairo University, Giza, Egypt.*

\*Corresponding authors:

Sherifa Hasabelnaby: Division of Pharmaceutical Organic Chemistry, Helwan University, Ain Helwan, Cairo, Egypt; E-mail: [sherifajanaa@yahoo.com](mailto:sherifajanaa@yahoo.com)

Werner Tjarks: Division of Medicinal Chemistry & Pharmacognosy, The Ohio State University, 500 West 12<sup>th</sup> Avenue, Columbus, OH 43210, USA; E-mail: [tjarks.1@osu.edu](mailto:tjarks.1@osu.edu), phone; +1 614 292 7624, fax; +1 614 292 2435

| <b>Table of Contents:</b>                                                                                                                                                                                                                                | <b>Page</b> |
|----------------------------------------------------------------------------------------------------------------------------------------------------------------------------------------------------------------------------------------------------------|-------------|
| 1. HR-MS-, <sup>1</sup> H-NMR-, and <sup>13</sup> C NMR spectra as well as HPLC chromatograms                                                                                                                                                            | S3-S77      |
| a. HR-MS-, <sup>1</sup> H-NMR-, and <sup>13</sup> C-NMR spectra of <b>6</b>                                                                                                                                                                              | S3-5        |
| b. HR-MS-, <sup>1</sup> H-NMR-, and <sup>13</sup> C-NMR spectra of <b>7</b>                                                                                                                                                                              | S6-8        |
| c. HR-MS- and <sup>1</sup> H-NMR spectra of <b>1</b>                                                                                                                                                                                                     | S9-10       |
| d. HR-MS- and <sup>1</sup> H-NMR spectra of <b>9</b>                                                                                                                                                                                                     | S11-13      |
| e. <sup>1</sup> H-NMR spectra of <b>10</b>                                                                                                                                                                                                               | S14         |
| f. HR-MS-, <sup>1</sup> H-NMR-, and <sup>13</sup> C-NMR spectra as well as HPLC chromatograms<br>of amino acid ester prodrugs of N5 ( <b>11-19</b> )                                                                                                     | S15-61      |
| g. HR-MS-, <sup>1</sup> H-NMR-, and <sup>13</sup> C-NMR spectra as well as HPLC chromatograms<br>of glycine ester prodrugs of N5-2OH ( <b>20-22</b> )                                                                                                    | S62-77      |
| 2. <sup>1</sup> H-NMR data and <i>R<sub>f</sub></i> values of the Boc-protected forms of the amino acid<br>ester prodrugs <b>11-22</b>                                                                                                                   | S78-81      |
| 3. Figures showing the percentage of the remaining concentrations of the<br>amino acid ester prodrugs following incubation in phosphate buffer saline<br>(PBS), Bovine serum, and Bovine cerebrospinal fluid (CSF) at 37 °C at<br>various time intervals | S82-99      |
| a- The percentage of the remaining concentrations of the amino acid ester<br>prodrugs <b>11-19</b> , and <b>21</b> following incubation in PBS at 37 °C at<br>various time intervals                                                                     | S82-91      |
| b- The percentage of the remaining concentrations of the amino acid ester<br>prodrugs <b>12,15, 18</b> , and <b>21</b> following incubation in Bovine serum at<br>37 °C at various time intervals                                                        | S92-95      |
| c- The percentage of the remaining concentrations of the amino acid ester<br>prodrugs <b>12,15, 18</b> , and <b>21</b> following incubation in CSF at 37 °C at<br>various time intervals                                                                 | S96-99      |

**1. HR-MS-, <sup>1</sup>H-NMR-, and <sup>13</sup>C-NMR spectra as well as HPLC chromatograms**

**5-{2-(*tert.*-Butyldimethylsilyl)-*o*-carboran-1-yl}pentyl 4-methylbenzenesulfonate (6). <sup>1</sup>H NMR**

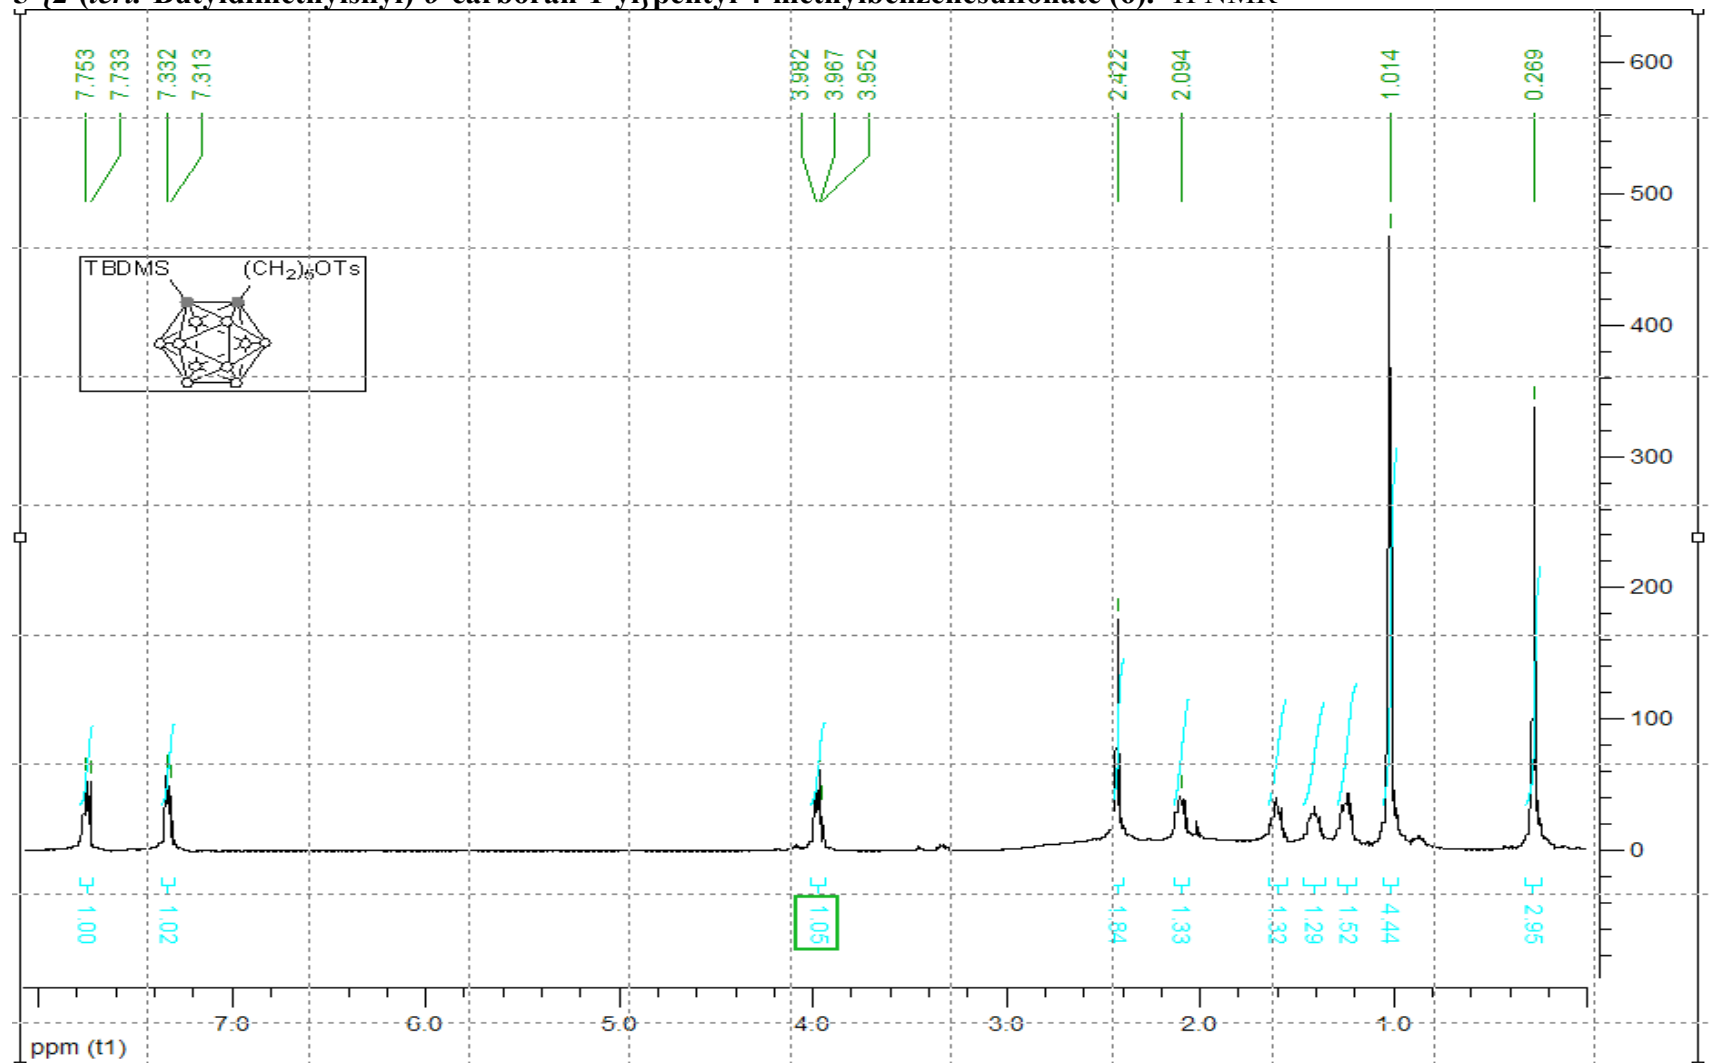

5-{2-(*tert.*-Butyldimethylsilyl)-*o*-carboran-1-yl}pentyl 4-methylbenzenesulfonate (6).  $^{13}\text{C}$  NMR

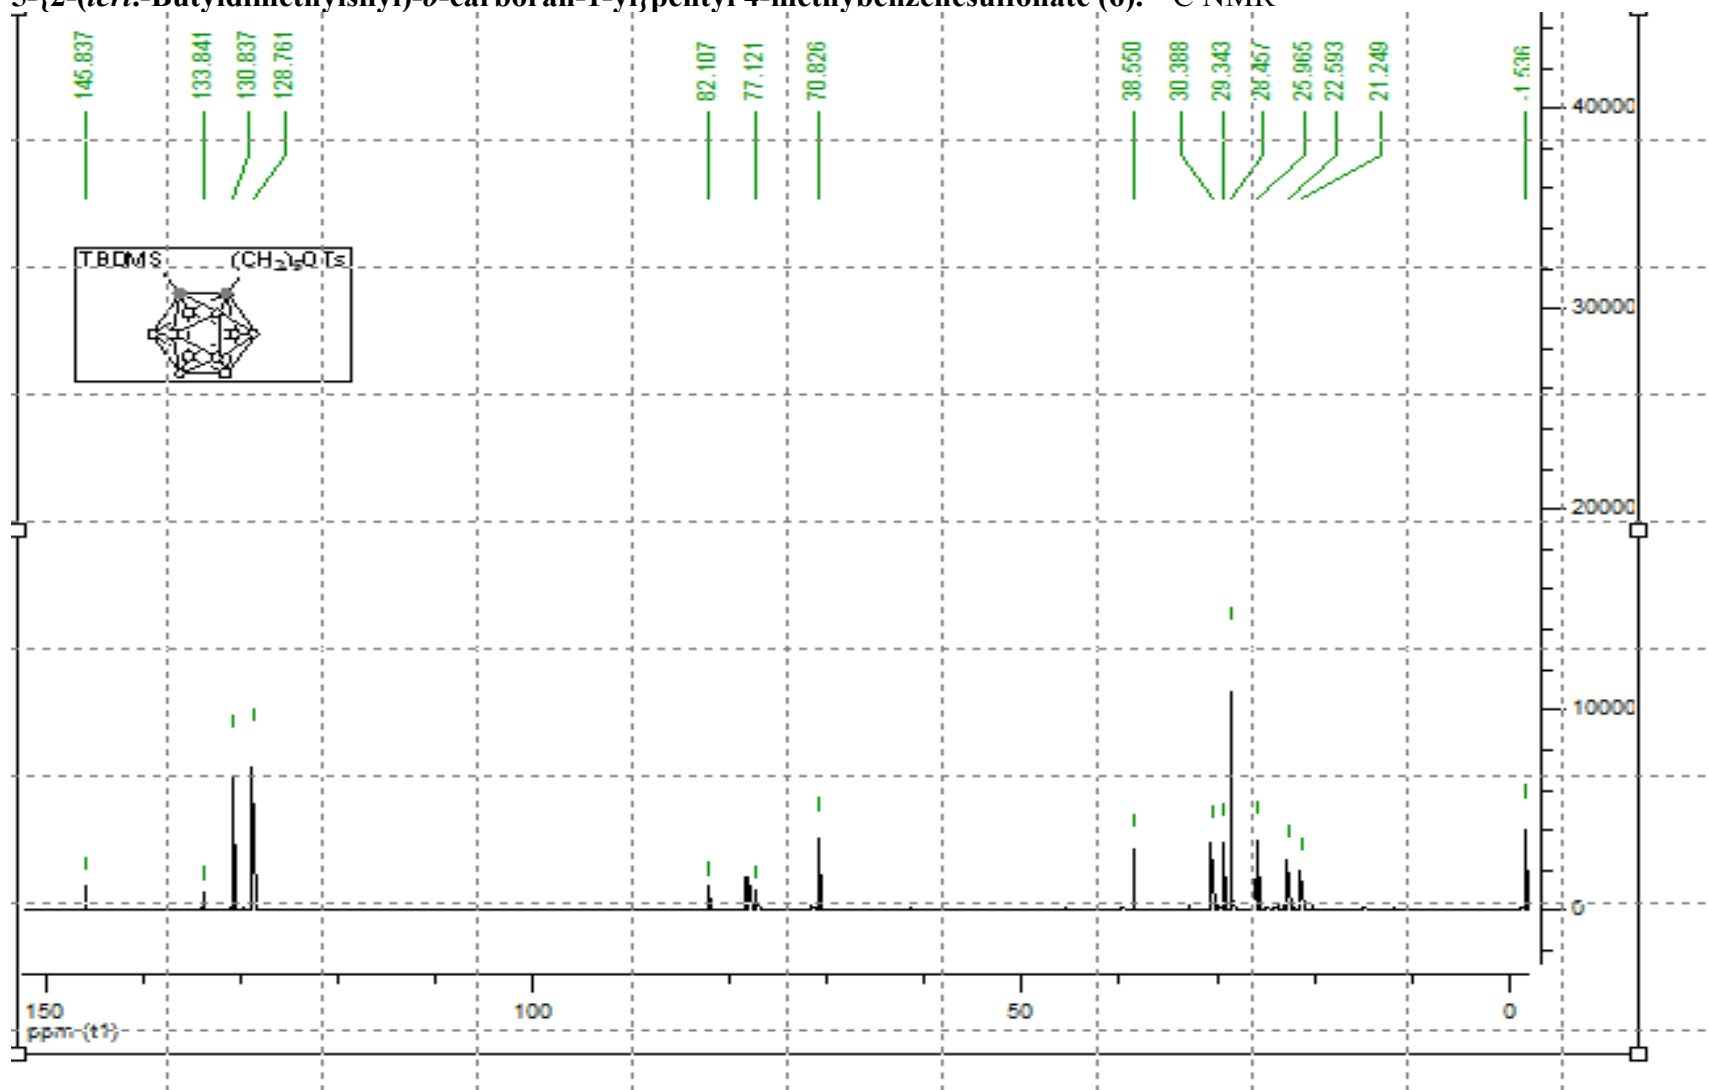

5-{2-(*tert.*-Butyldimethylsilyl)-*o*-carboran-1-yl}pentyl 4-methylbenzenesulfonate (6). HR-ESI-MS: found: m/z 521.3434

L0810081 281 (5.154) AM (Cen,4, 80.00, Ar,0.0,0.00,1.00); Sm (SG, 2x3.00); Cm (169:309)

TOF MS ES+  
9.78e5

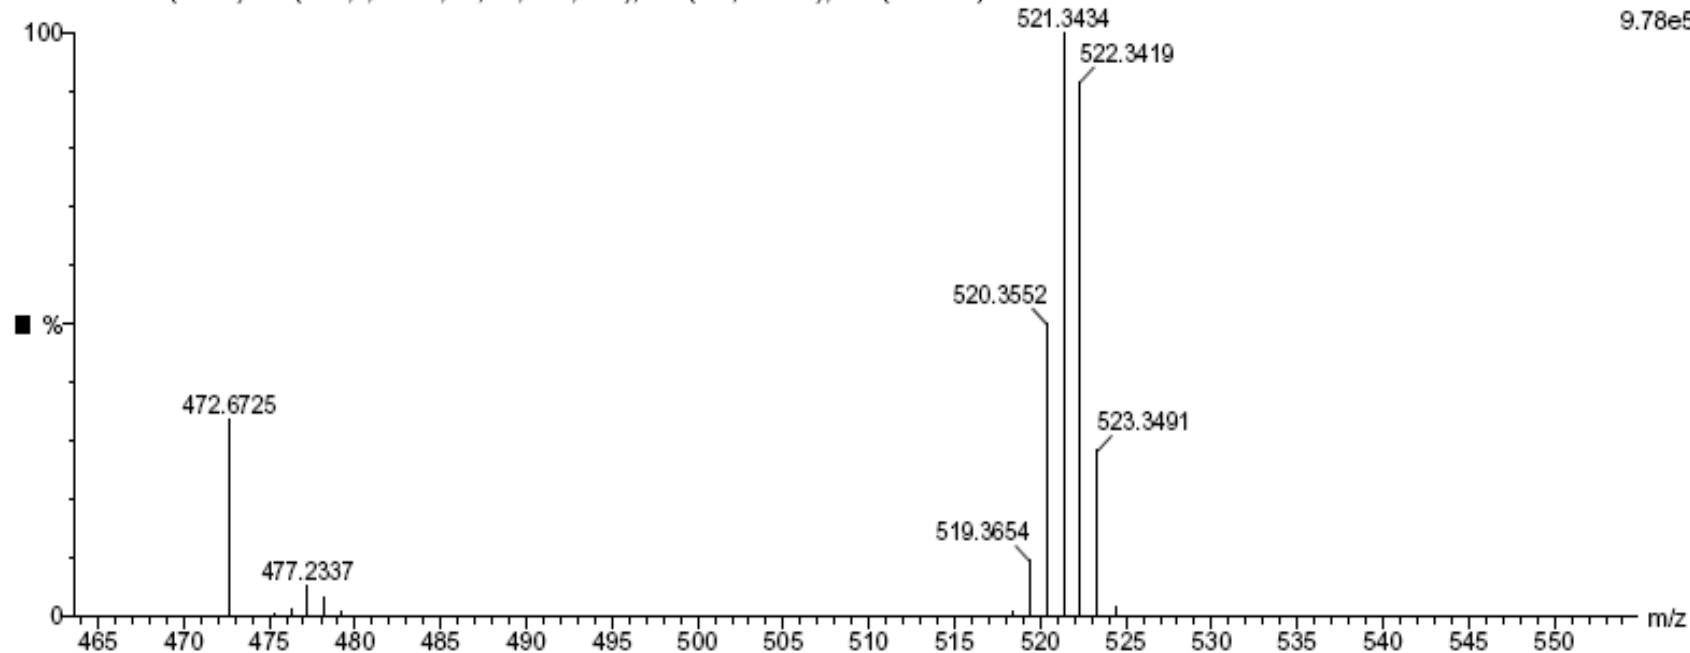

3-(5-{2-[*tert*-Butyldimethylsilyl]-*o*-carboran-1-yl}pentan-1-yl)thymidine (7). <sup>1</sup>H NMR

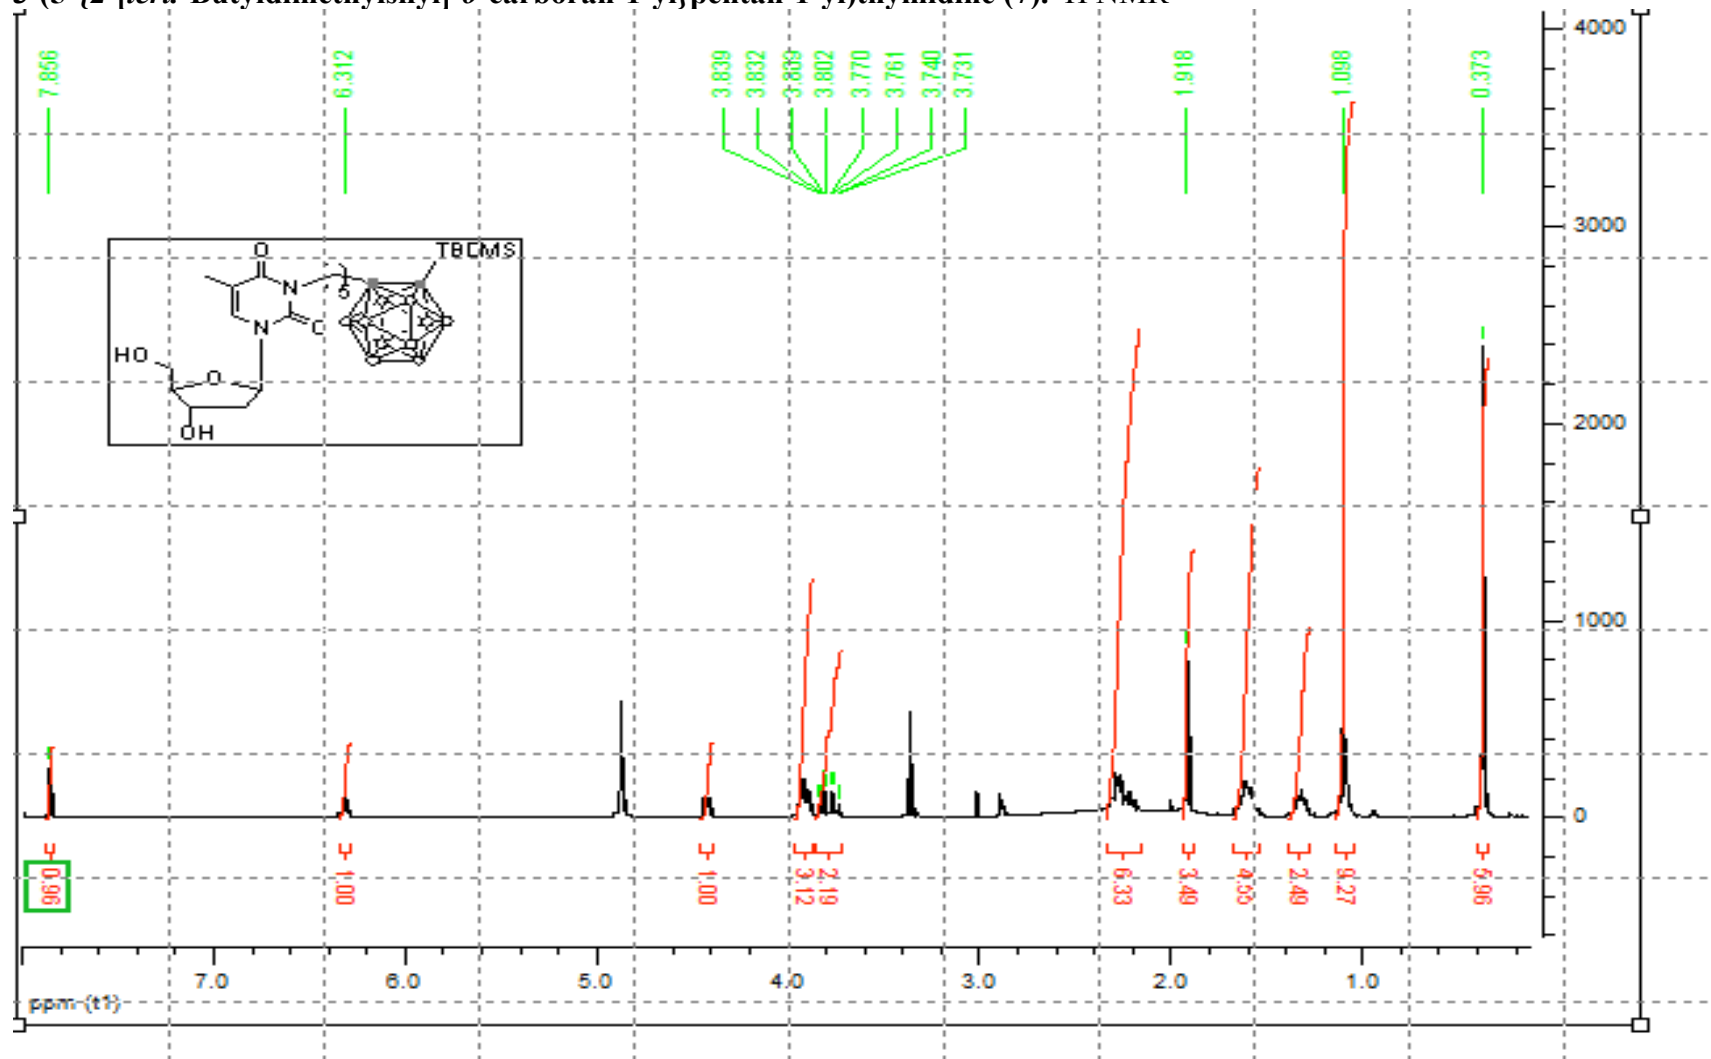

3-(5-{2-[*tert*-Butyldimethylsilyl]-*o*-carboran-1-yl}pentan-1-yl)thymidine (7). <sup>13</sup>C NMR

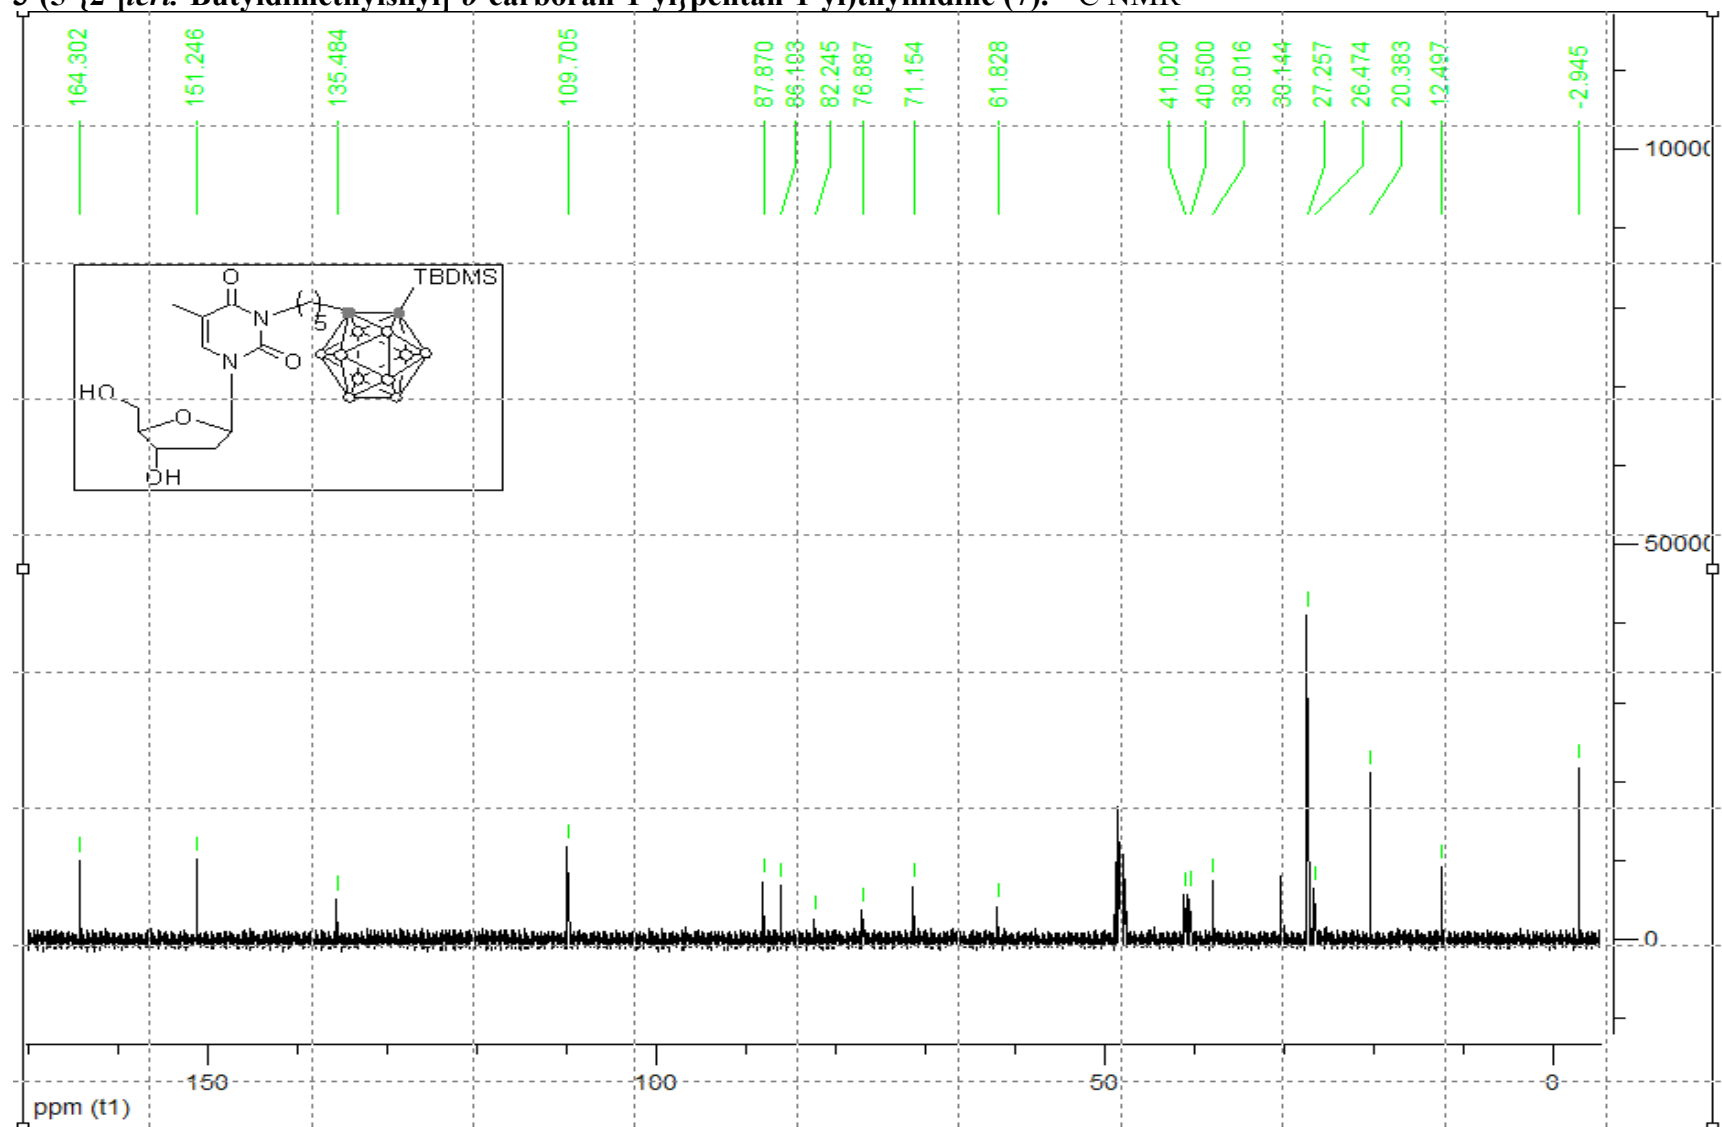

3-(5-{2-[*tert*-Butyldimethylsilyl]-*o*-carboran-1-yl}pentan-1-yl)thymidine (7). HR-ESI-MS: found:  $m/z$  591.4304.

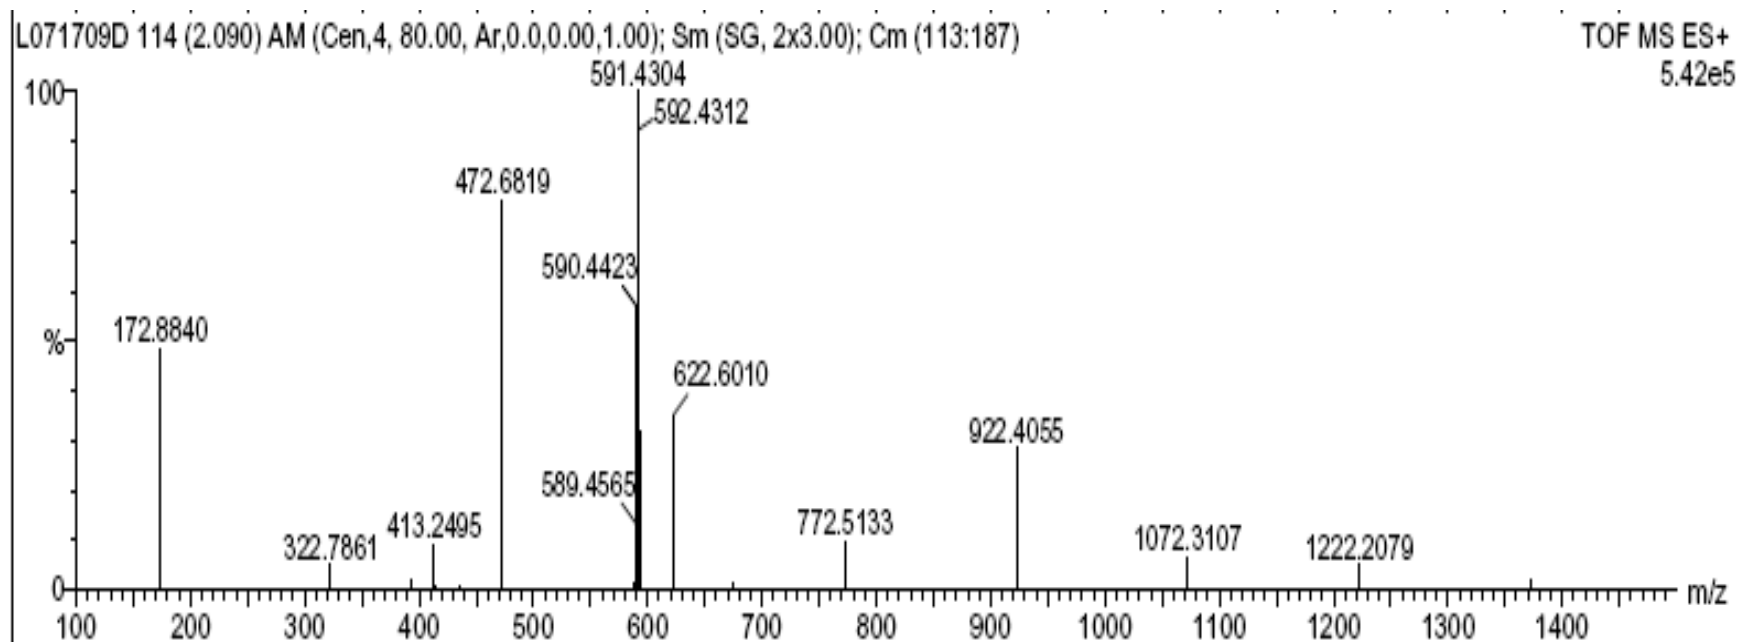



3-(5-{*o*-Carboran-1-yl}pentan-1-yl)thymidine (1). <sup>1</sup>H NMR

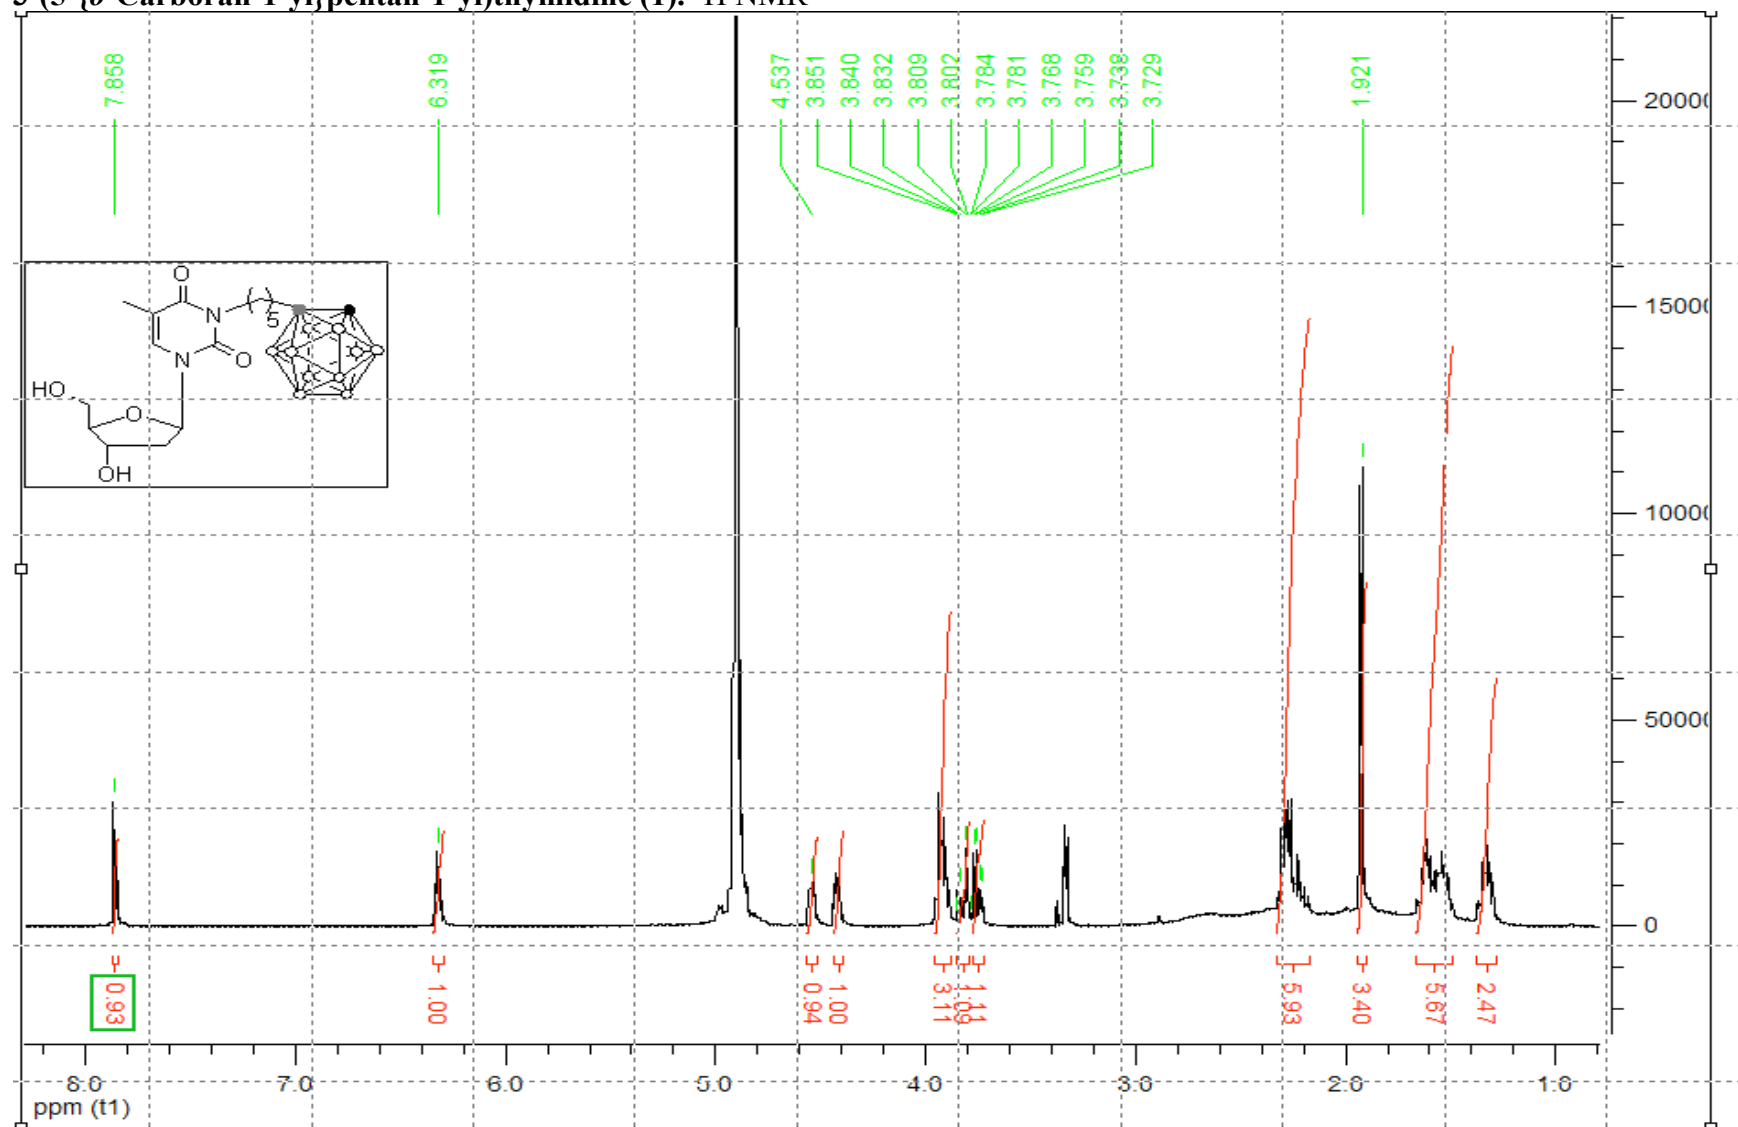

3-(5-*o*-Carboran-1-yl)pentan-1-ylthymidine (1). HR-ESI-MS: found: m/z 477.3546.

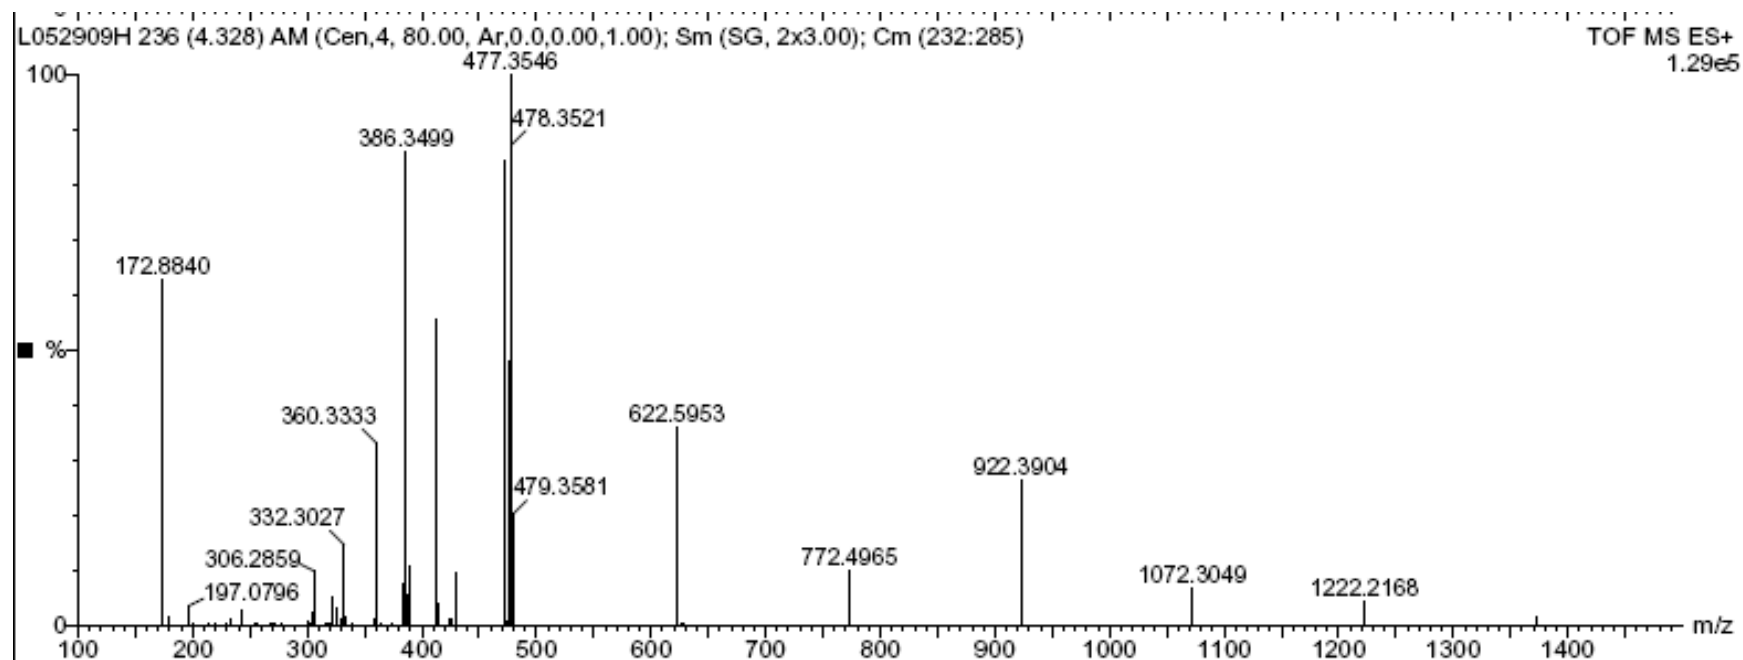

4-(2-{5-Iodopentyl}-*o*-carboran-1-yl)methyl-2,2-dimethyl-1,3-dioxolane (9).  $^1\text{H}$  NMR

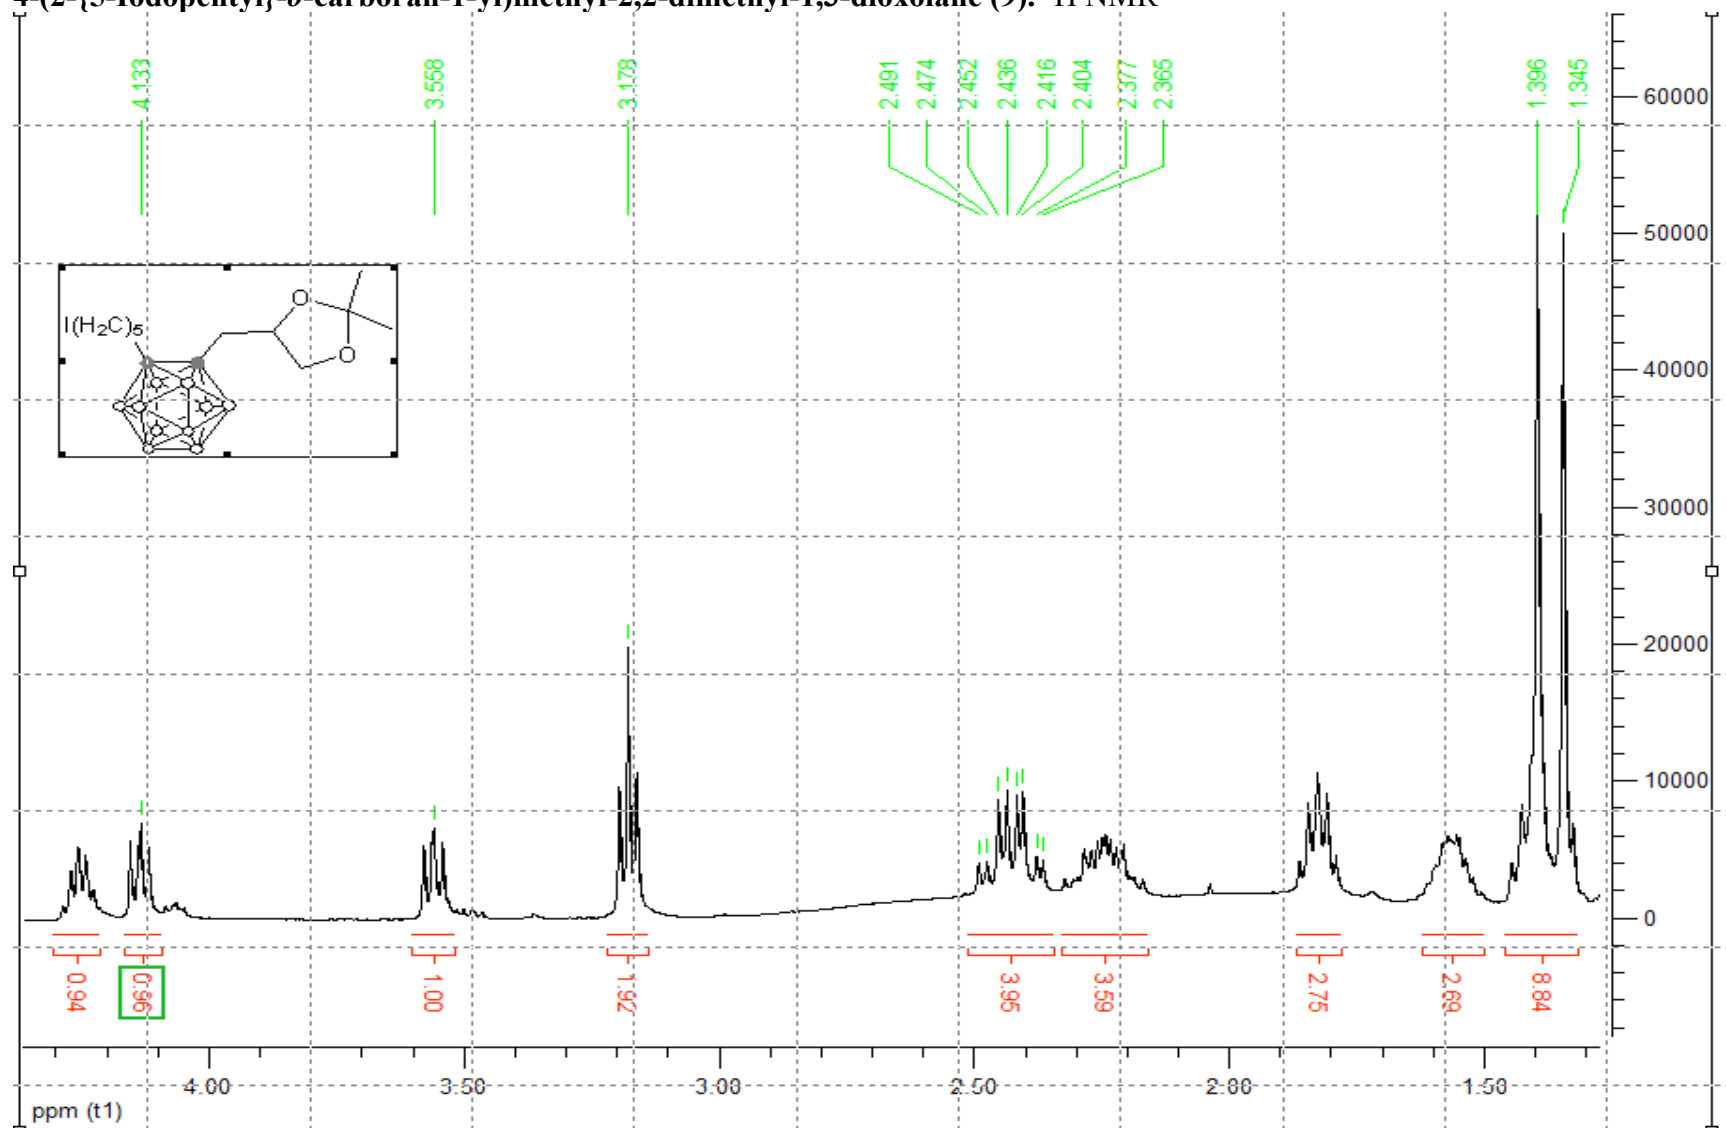

4-(2-{5-Iodopentyl}-*o*-carboran-1-yl)methyl-2,2-dimethyl-1,3-dioxolane (9).  $^{13}\text{C}$  NMR

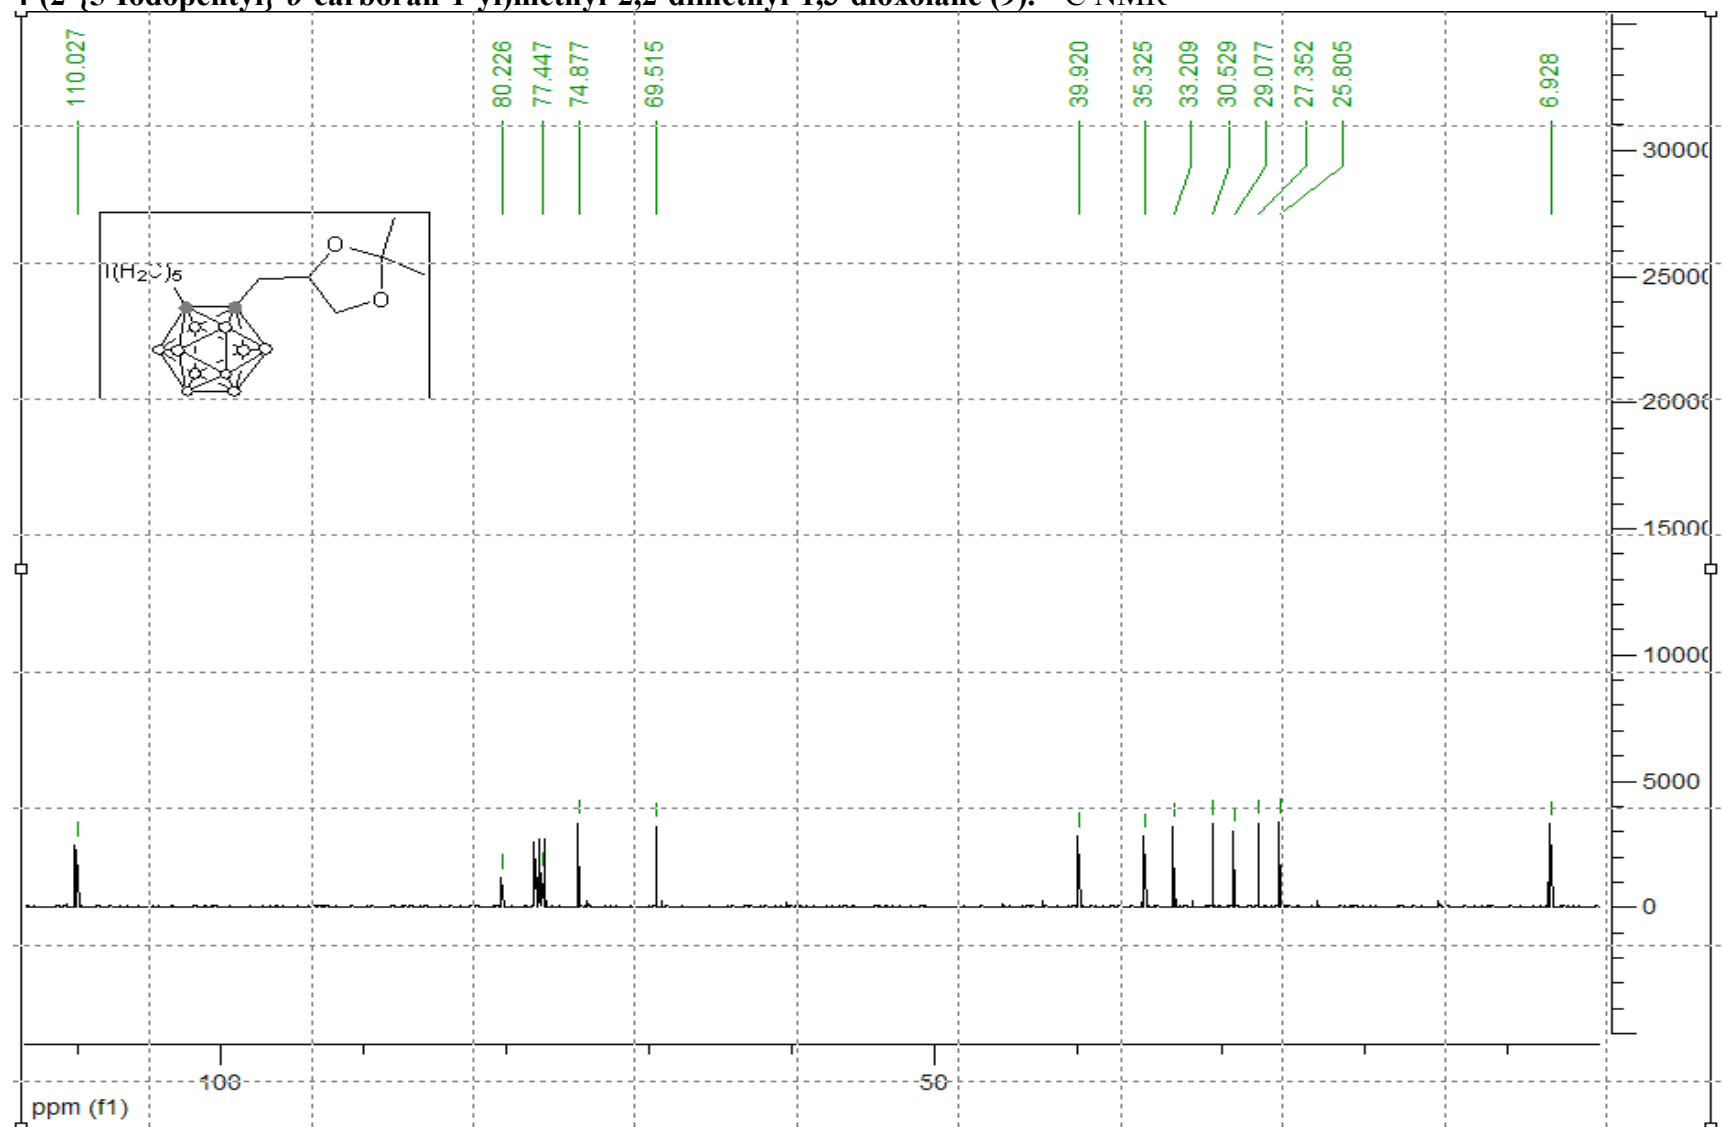

4-(2-{5-Iodopentyl}-*o*-carboran-1-yl)methyl-2,2-dimethyl-1,3-dioxolane (9). HR-ESI-MS: found: m/z 477.2257.

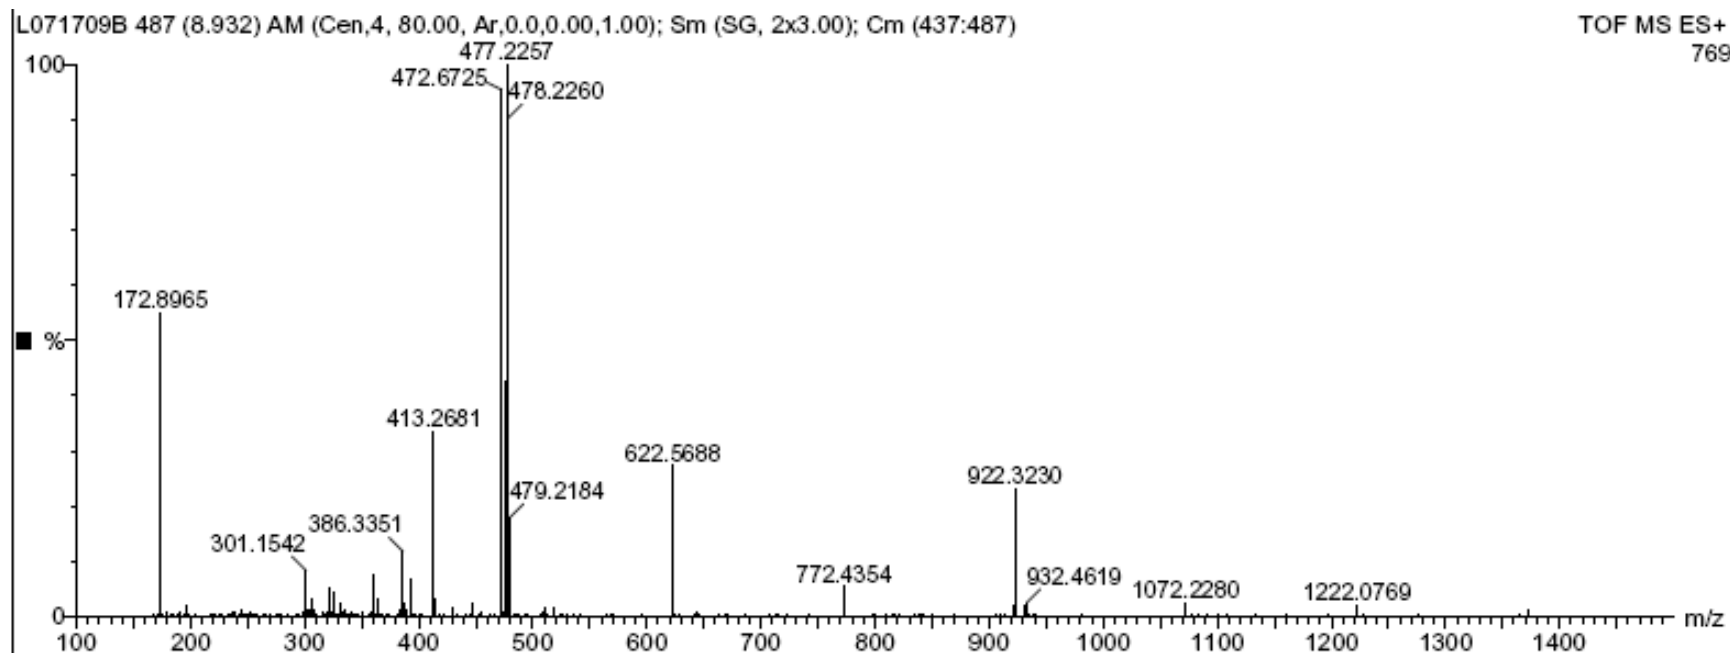

3-(5-{2-[(2,2-Dimethyl-1,3-dioxolane-4-yl)methyl]-*o*-carboran-1-yl}pentyl)thymidine (10). <sup>1</sup>H NMR

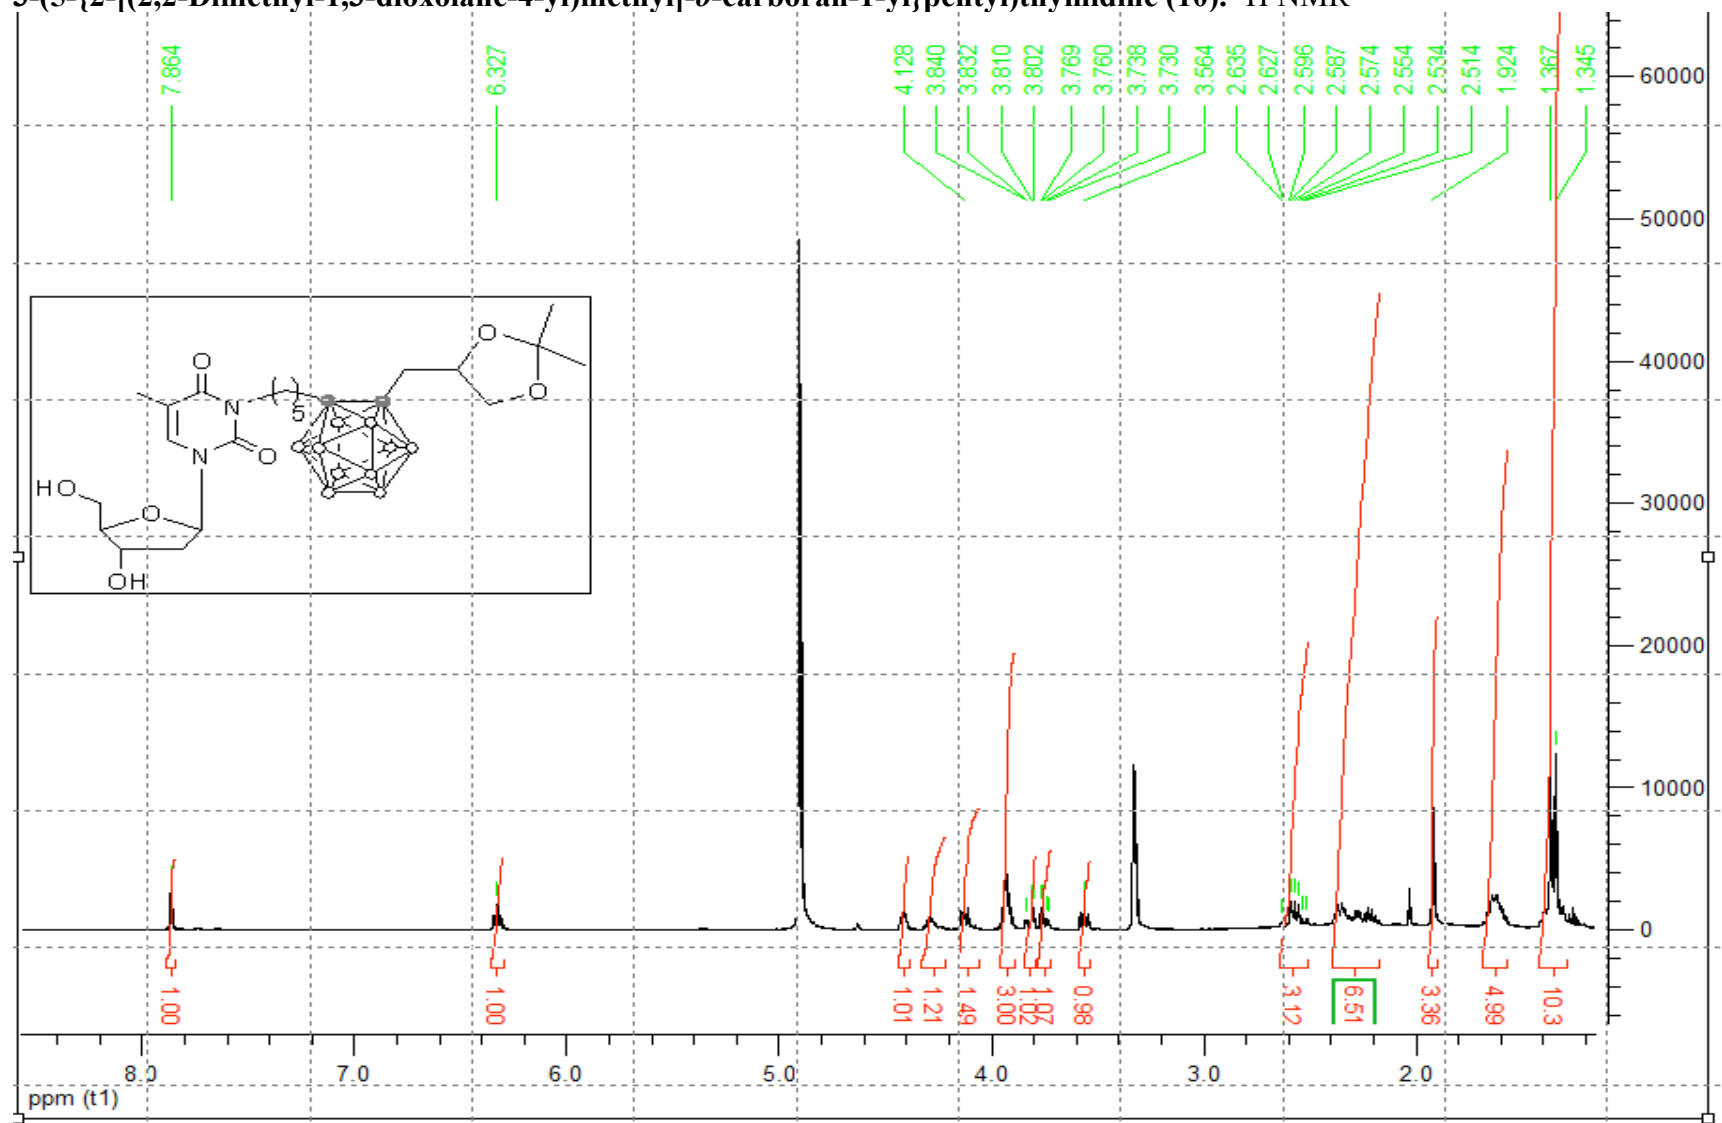

3'-L-Valyl-3-(5-{*o*-carboran-1-yl}pentyl)thymidine (11). <sup>1</sup>H NMR

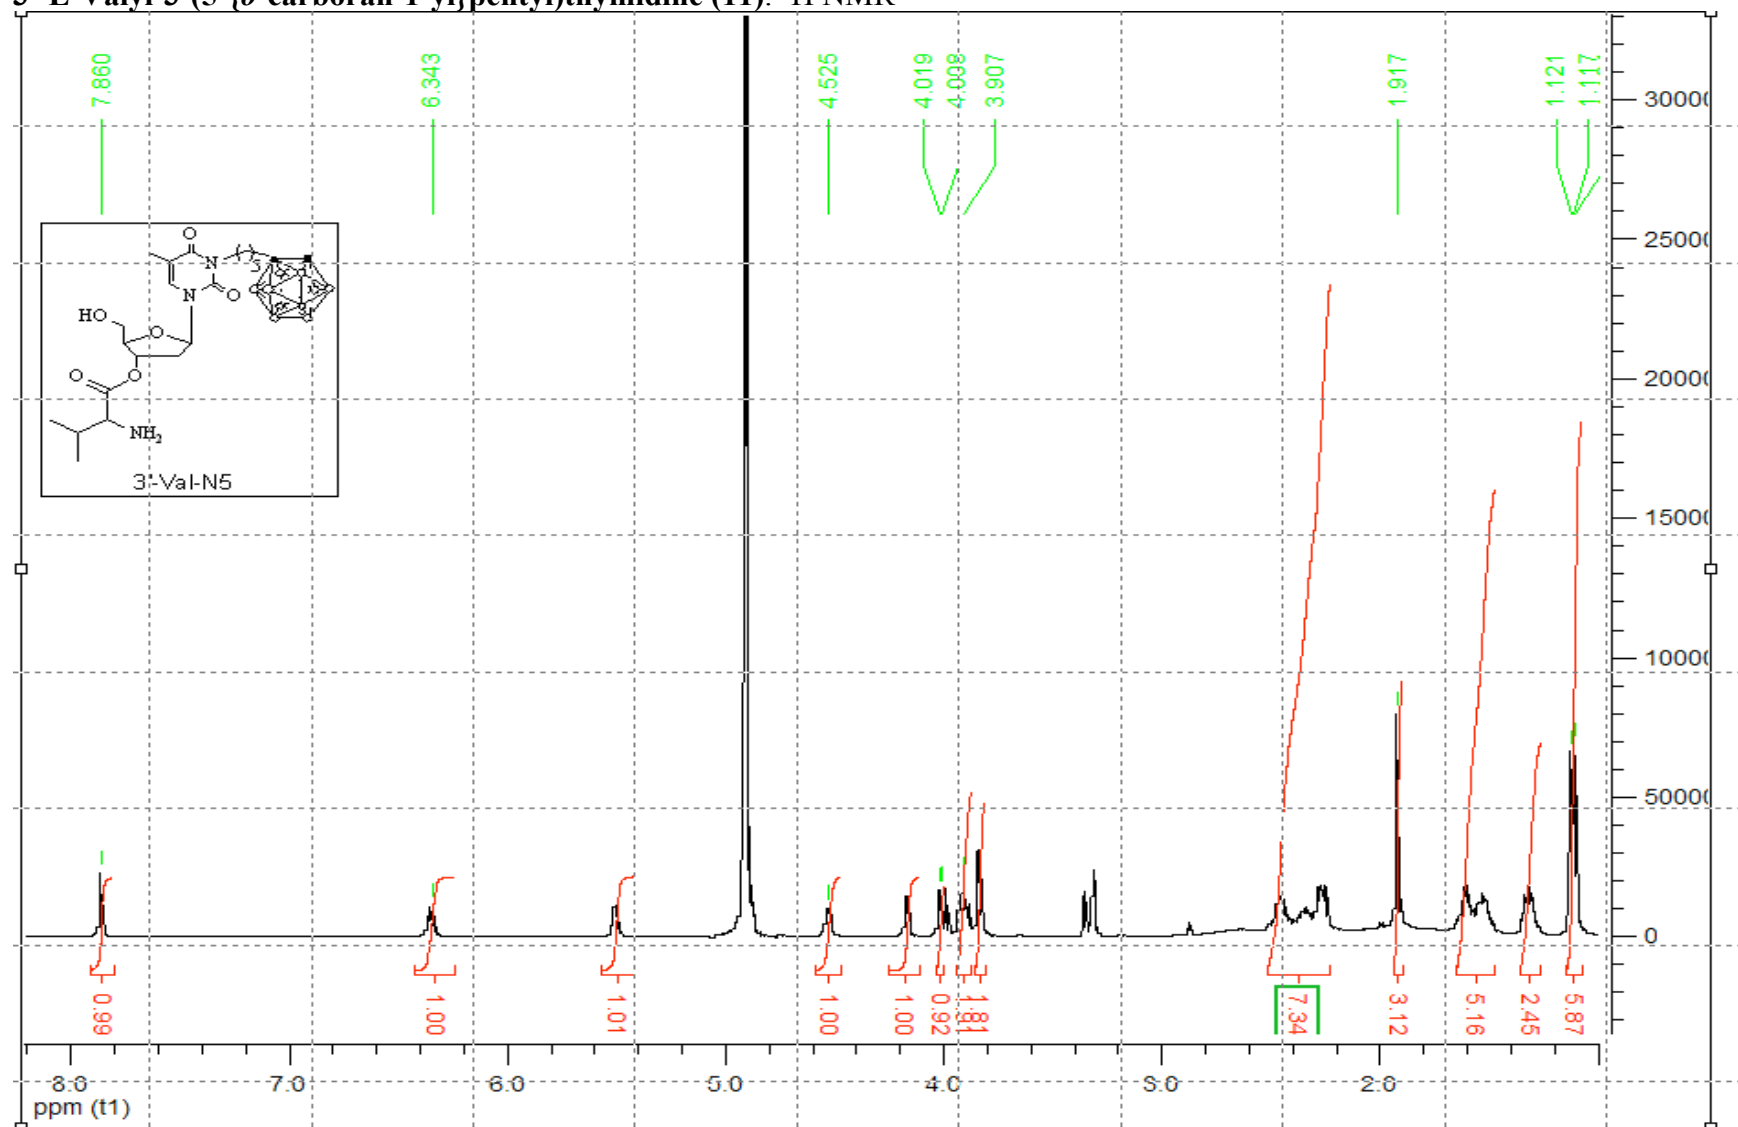

3'-L-Valyl-3-(5-{*o*-carboran-1-yl}pentan-1-yl)thymidine (11). <sup>13</sup>C NMR

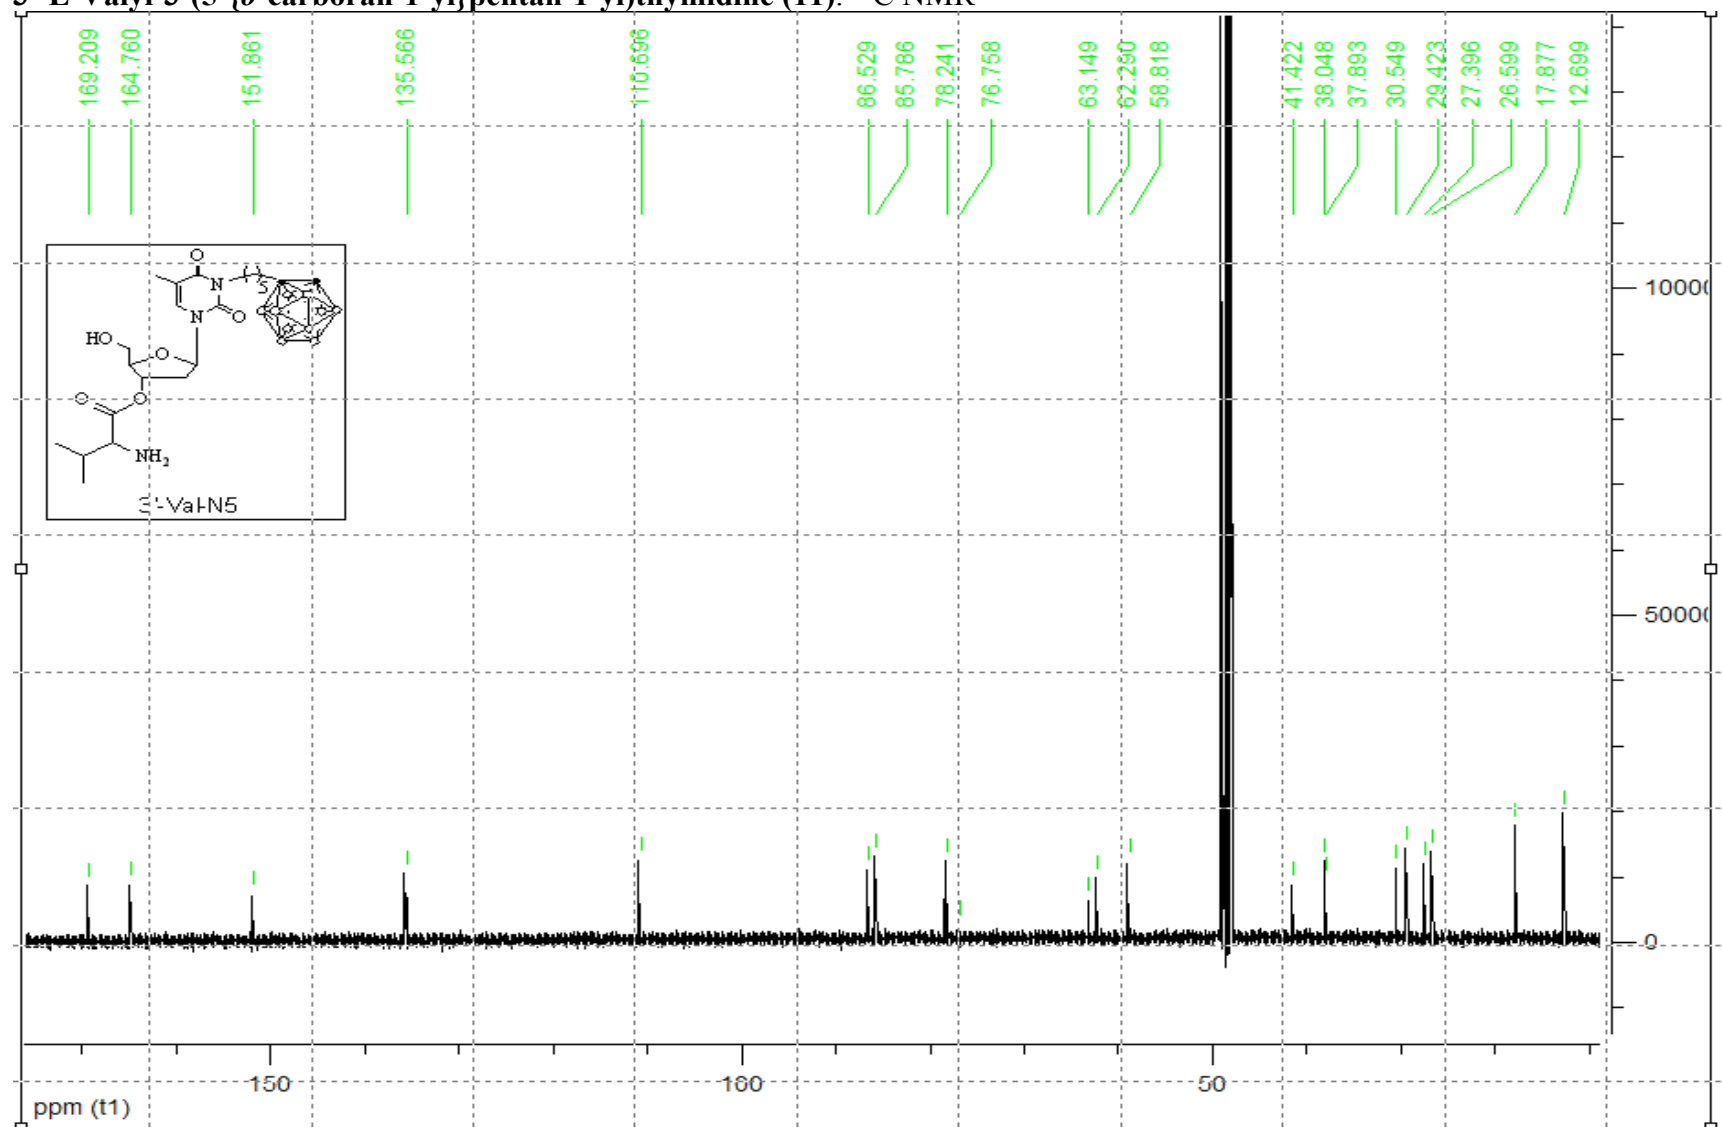



**3'-L-Valyl-3-(5-{*o*-carboran-1-yl}pentan-1-yl)thymidine (11).** HR-ESI-MS: found: m/z 554.4145.

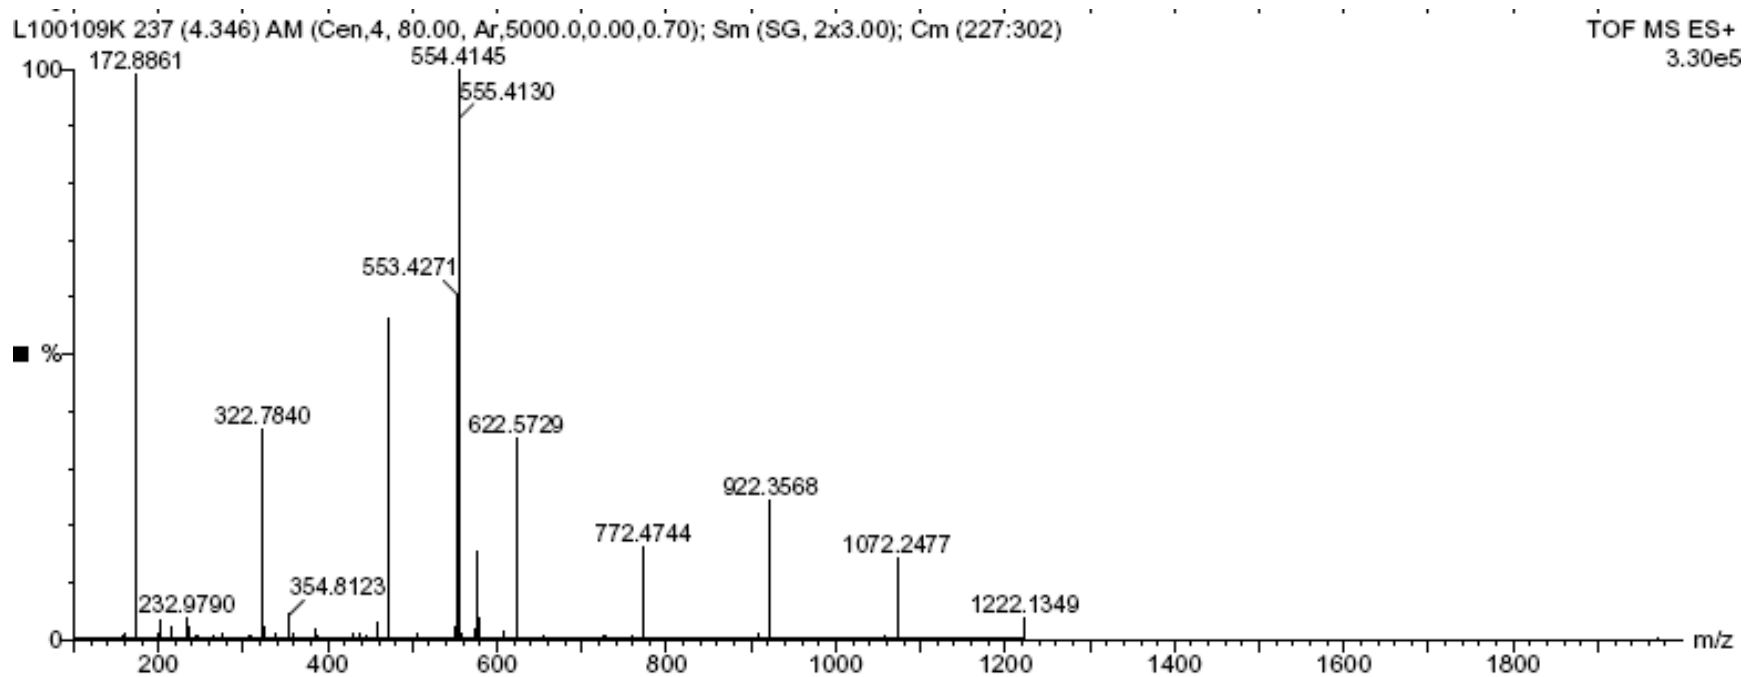

**3'-L-Valyl-3-(5-{*o*-carboran-1-yl}pentan-1-yl)thymidine (11)**. HPLC chromatogram (method A1, Table 3 in manuscript), retention time: 18.82 min.

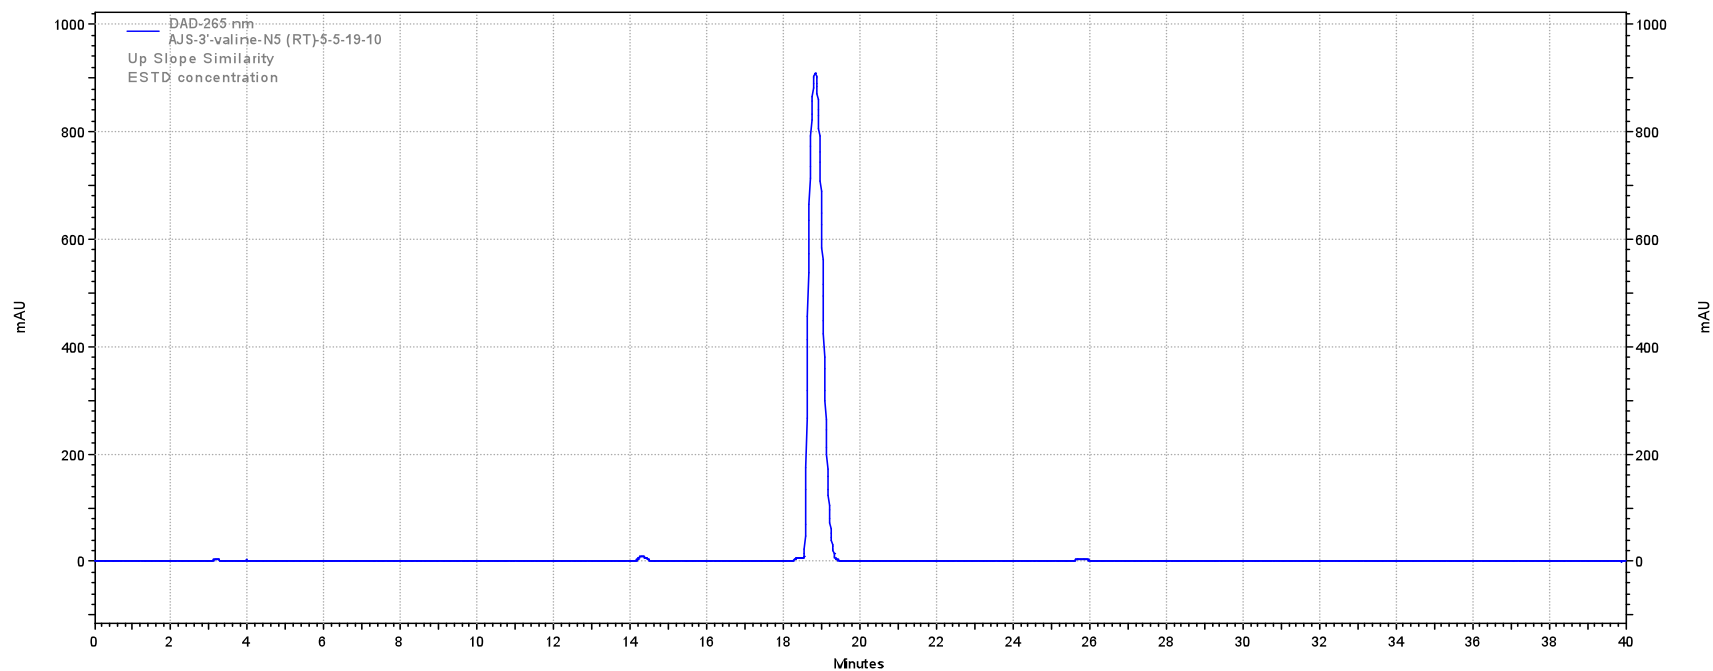

**3'-L-Valyl-3-(5-{*o*-carboran-1-yl}pentan-1-yl)thymidine (11)**. HPLC chromatogram (method B1, Table 3 in manuscript), retention time: 33.03 min.

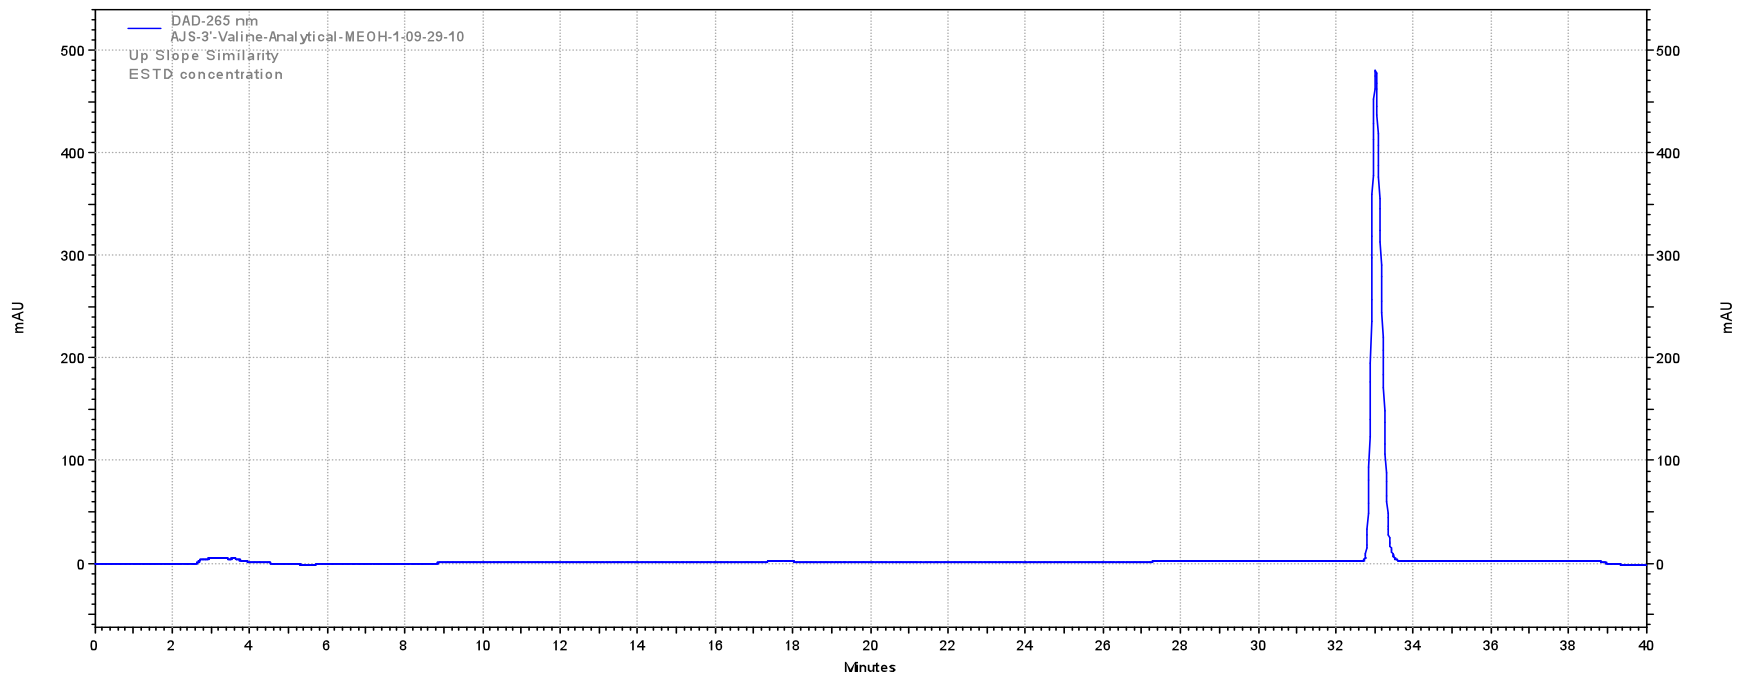

5'-L-Valyl-3-(5-{*o*-carboran-1-yl}pentyl)thymidine (12). <sup>1</sup>H NMR

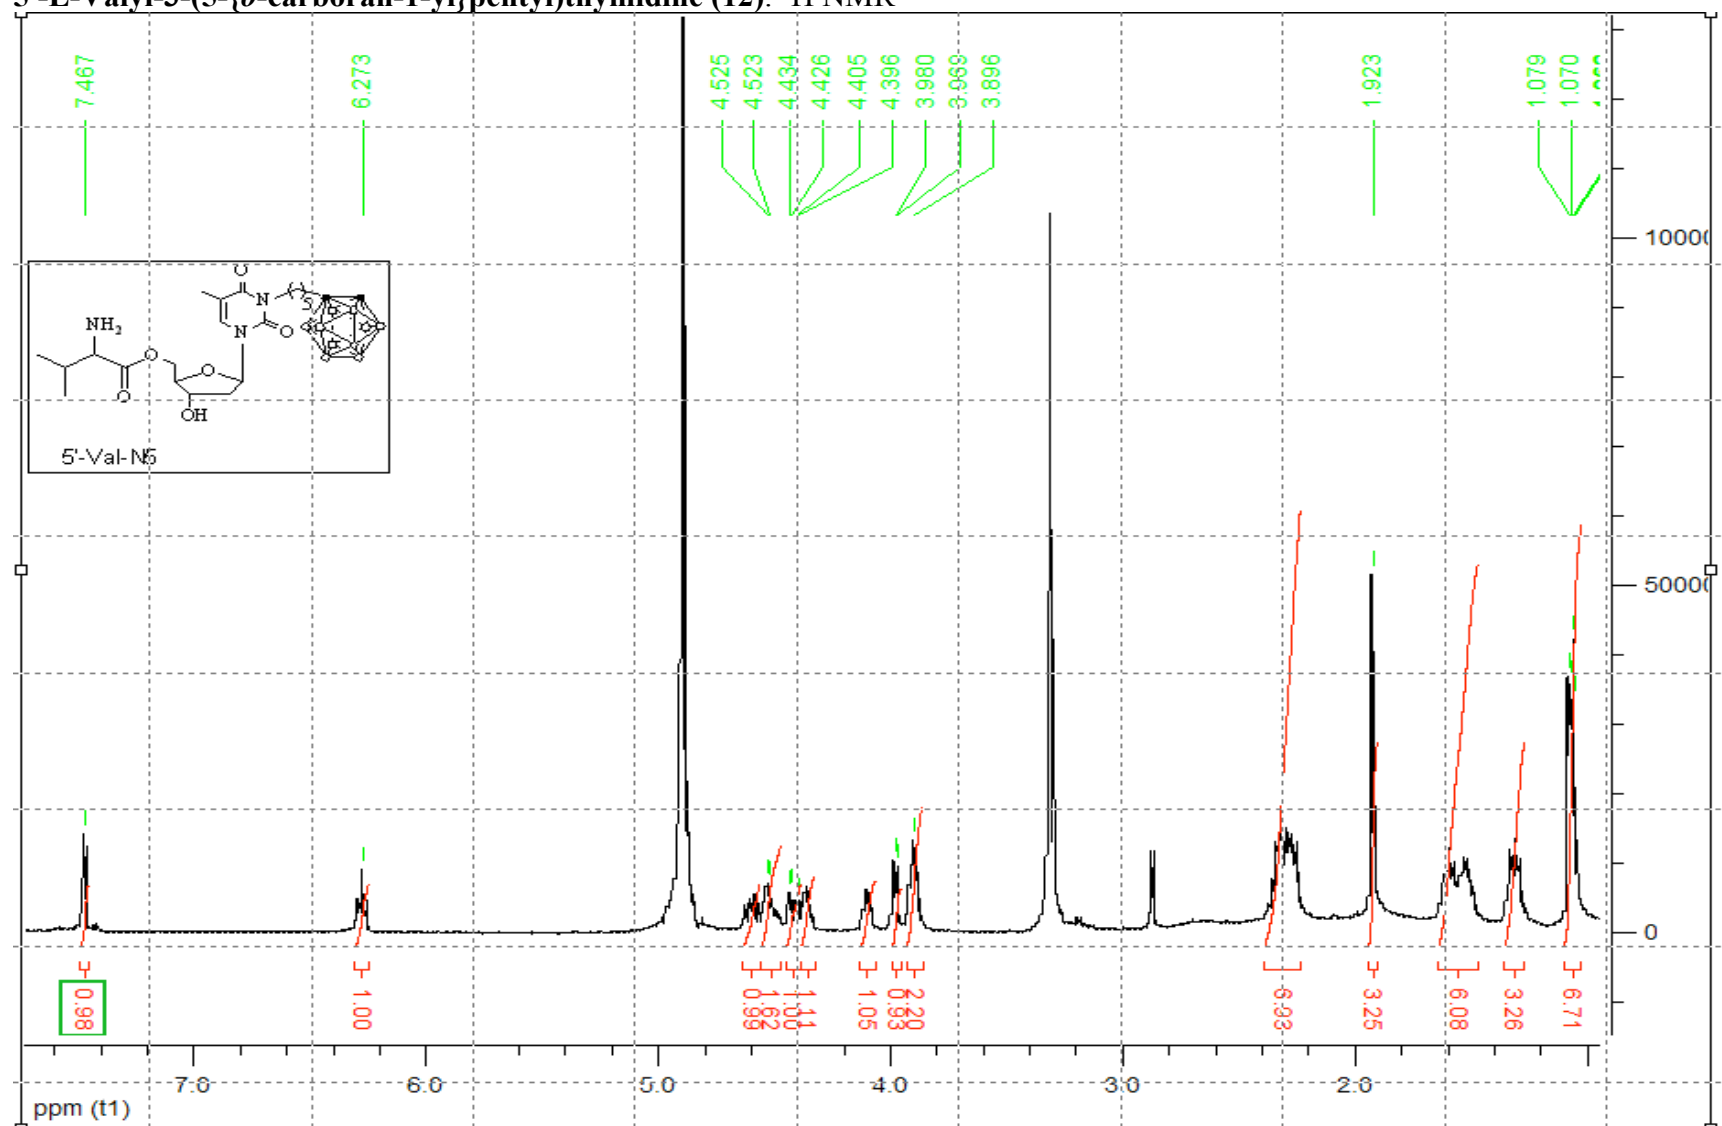

5'-L-Valyl-3-(5-{*o*-carboran-1-yl}pentyl)thymidine (12). <sup>13</sup>C NMR

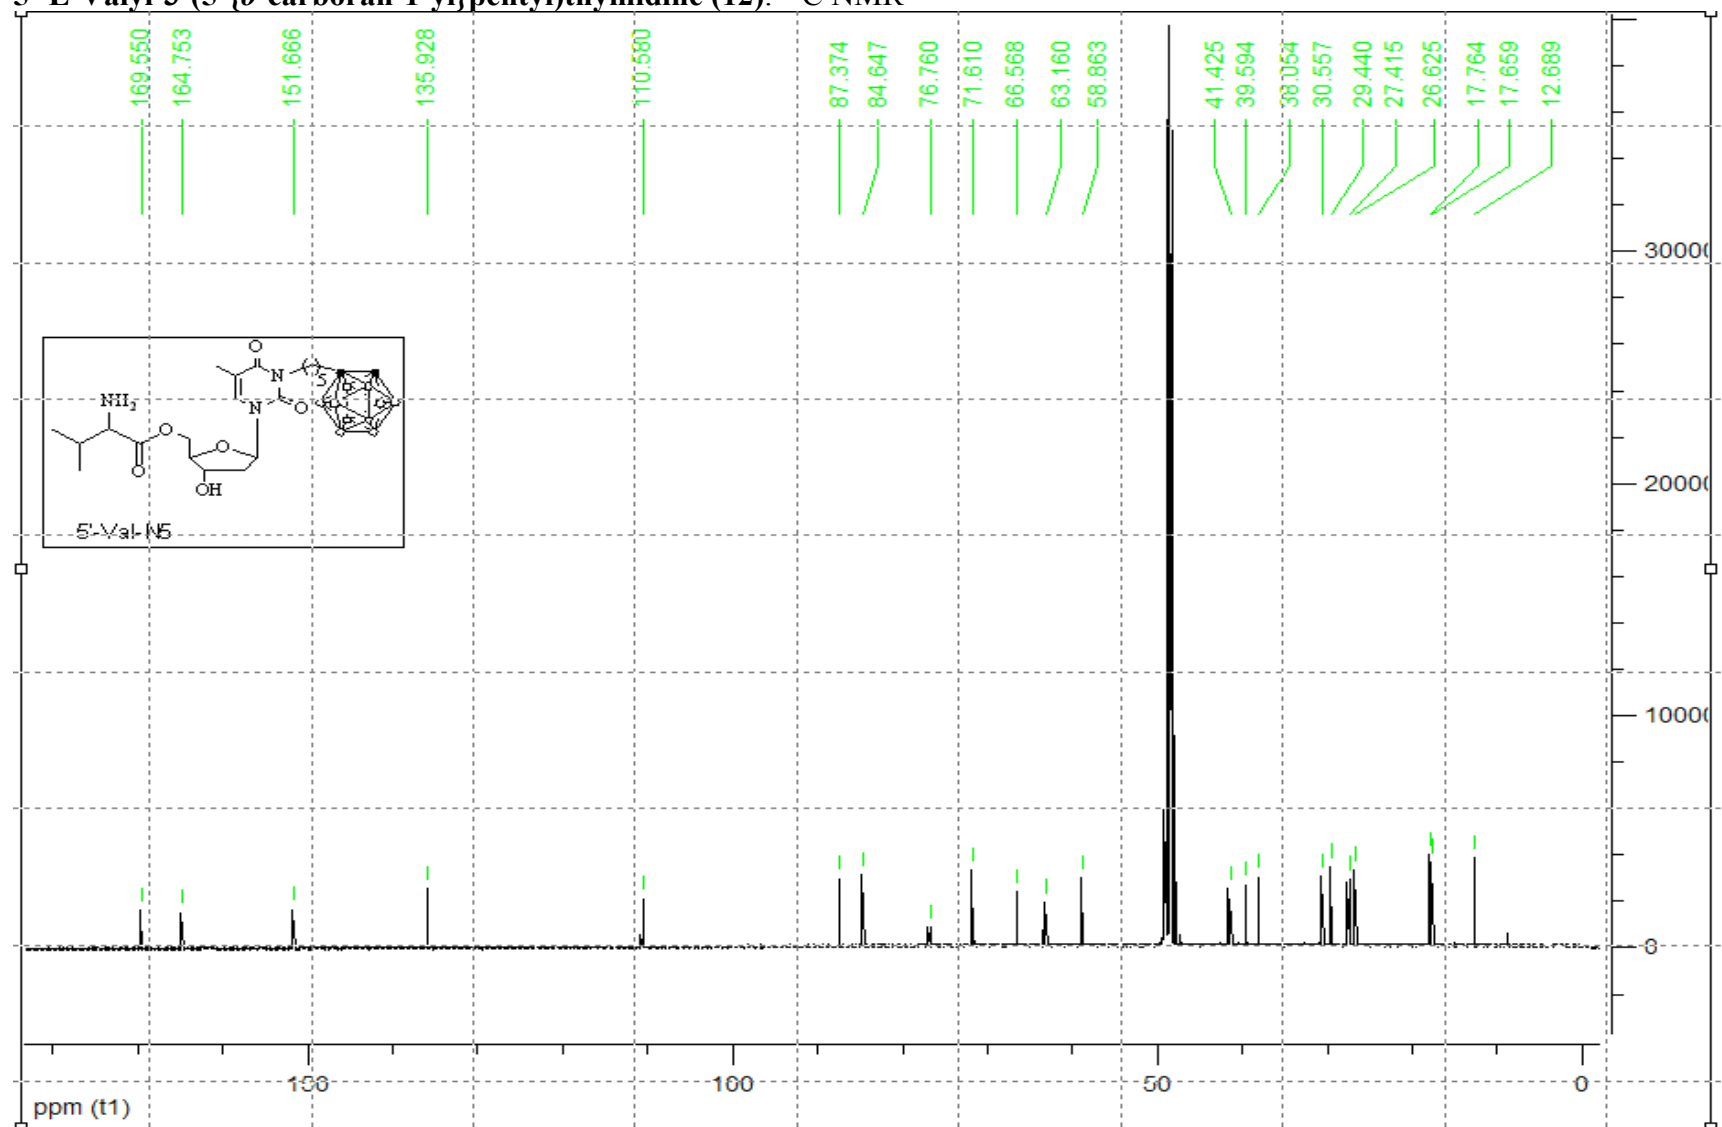

**5'-L-Valyl-3-(5-{*o*-carboran-1-yl}pentan-1-yl)thymidine (12).** HR-ESI-MS: found:  $m/z$  554.4227, and 576.4076.

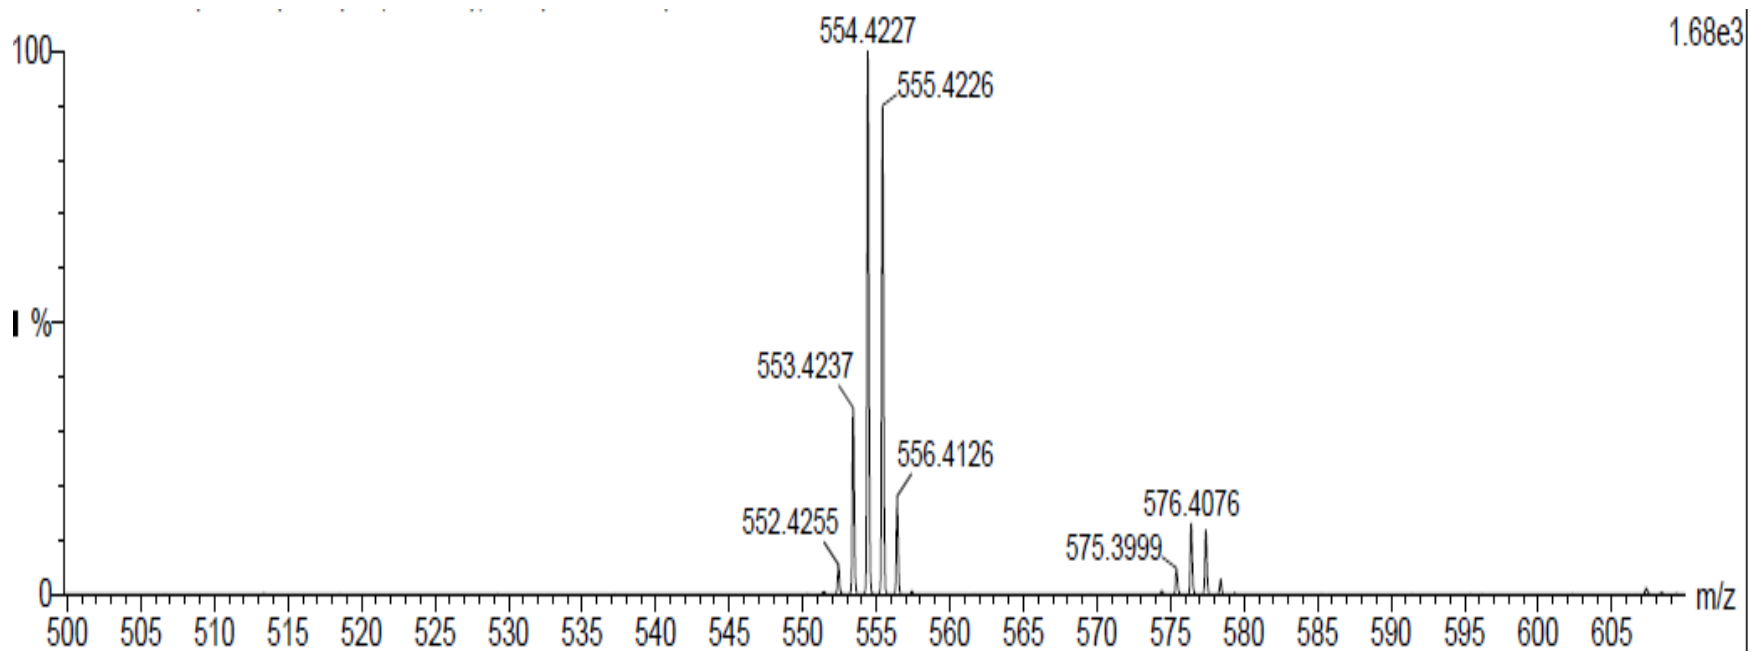

**5'-L-Valyl-3-(5-{*o*-carboran-1-yl}pentan-1-yl)thymidine (12).** HPLC chromatogram (method **A1**, Table 3 in manuscript), retention time: 18.09 min.

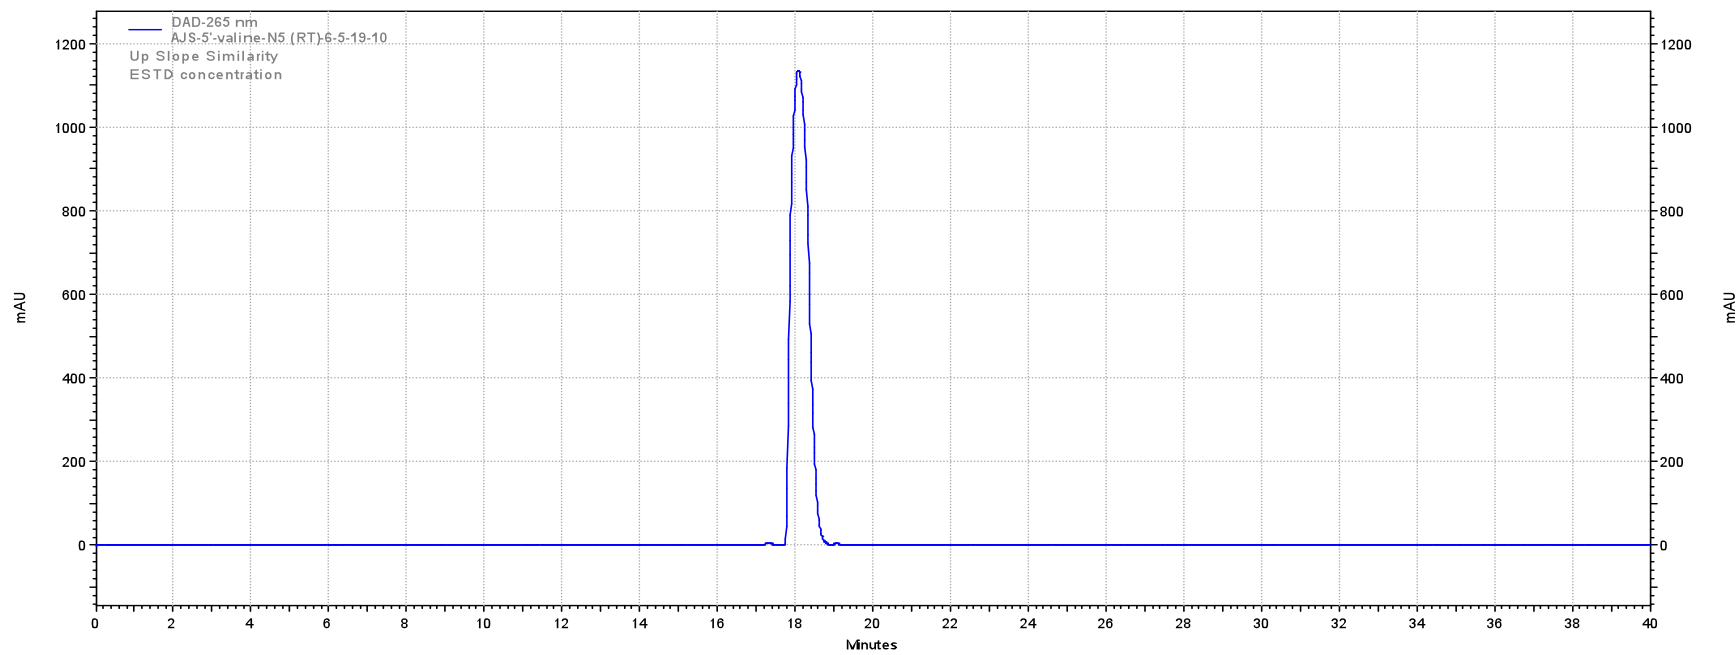

**5'-L-Valyl-3-(5-{*o*-carboran-1-yl}pentan-1-yl)thymidine (12).** HPLC chromatogram (method B1, Table 3 in manuscript), retention time: 31.29 min.

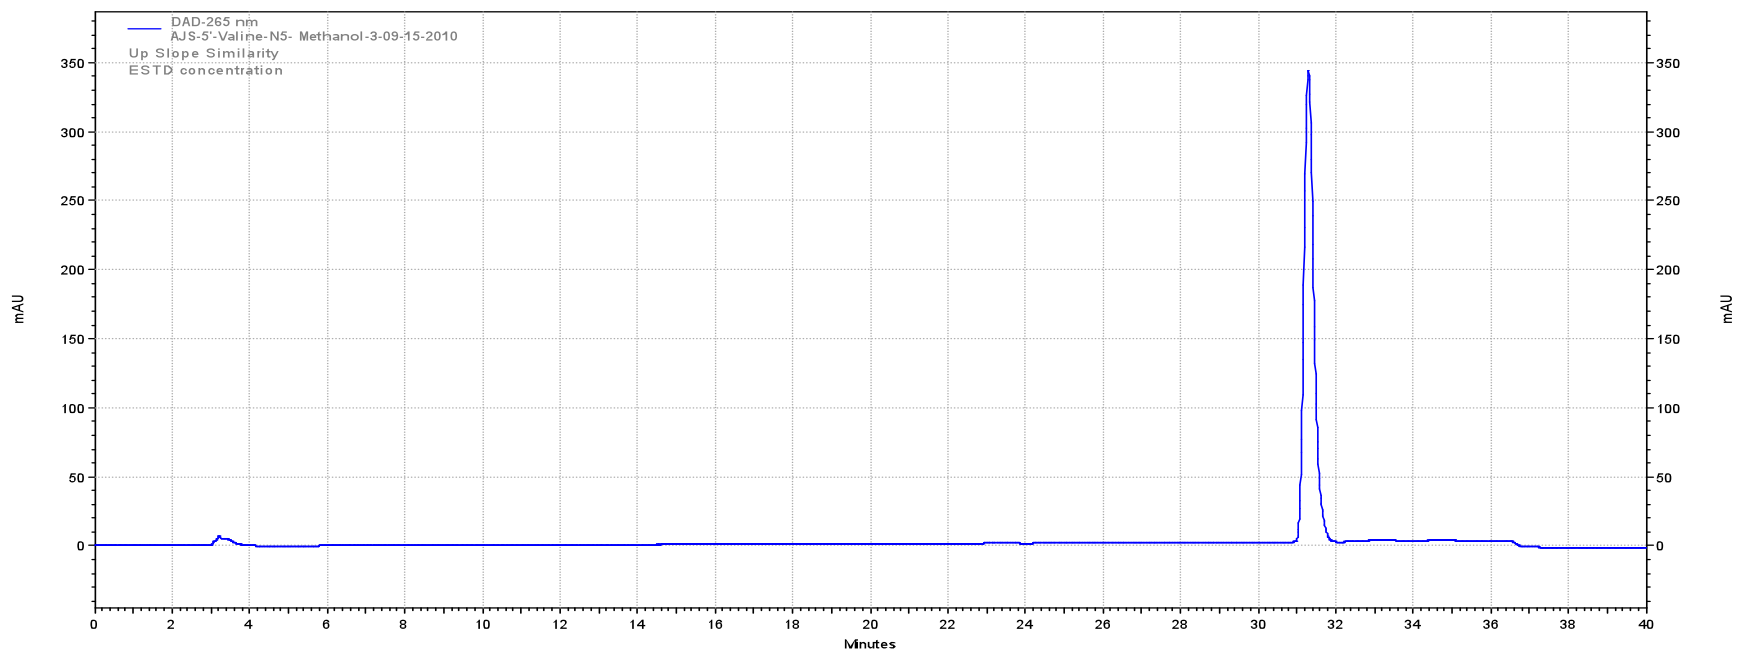



3',5'-Di-L-valyl-3-(5-{*o*-carboran-1-yl}pentan-1-yl)thymidine (13). <sup>1</sup>H NMR

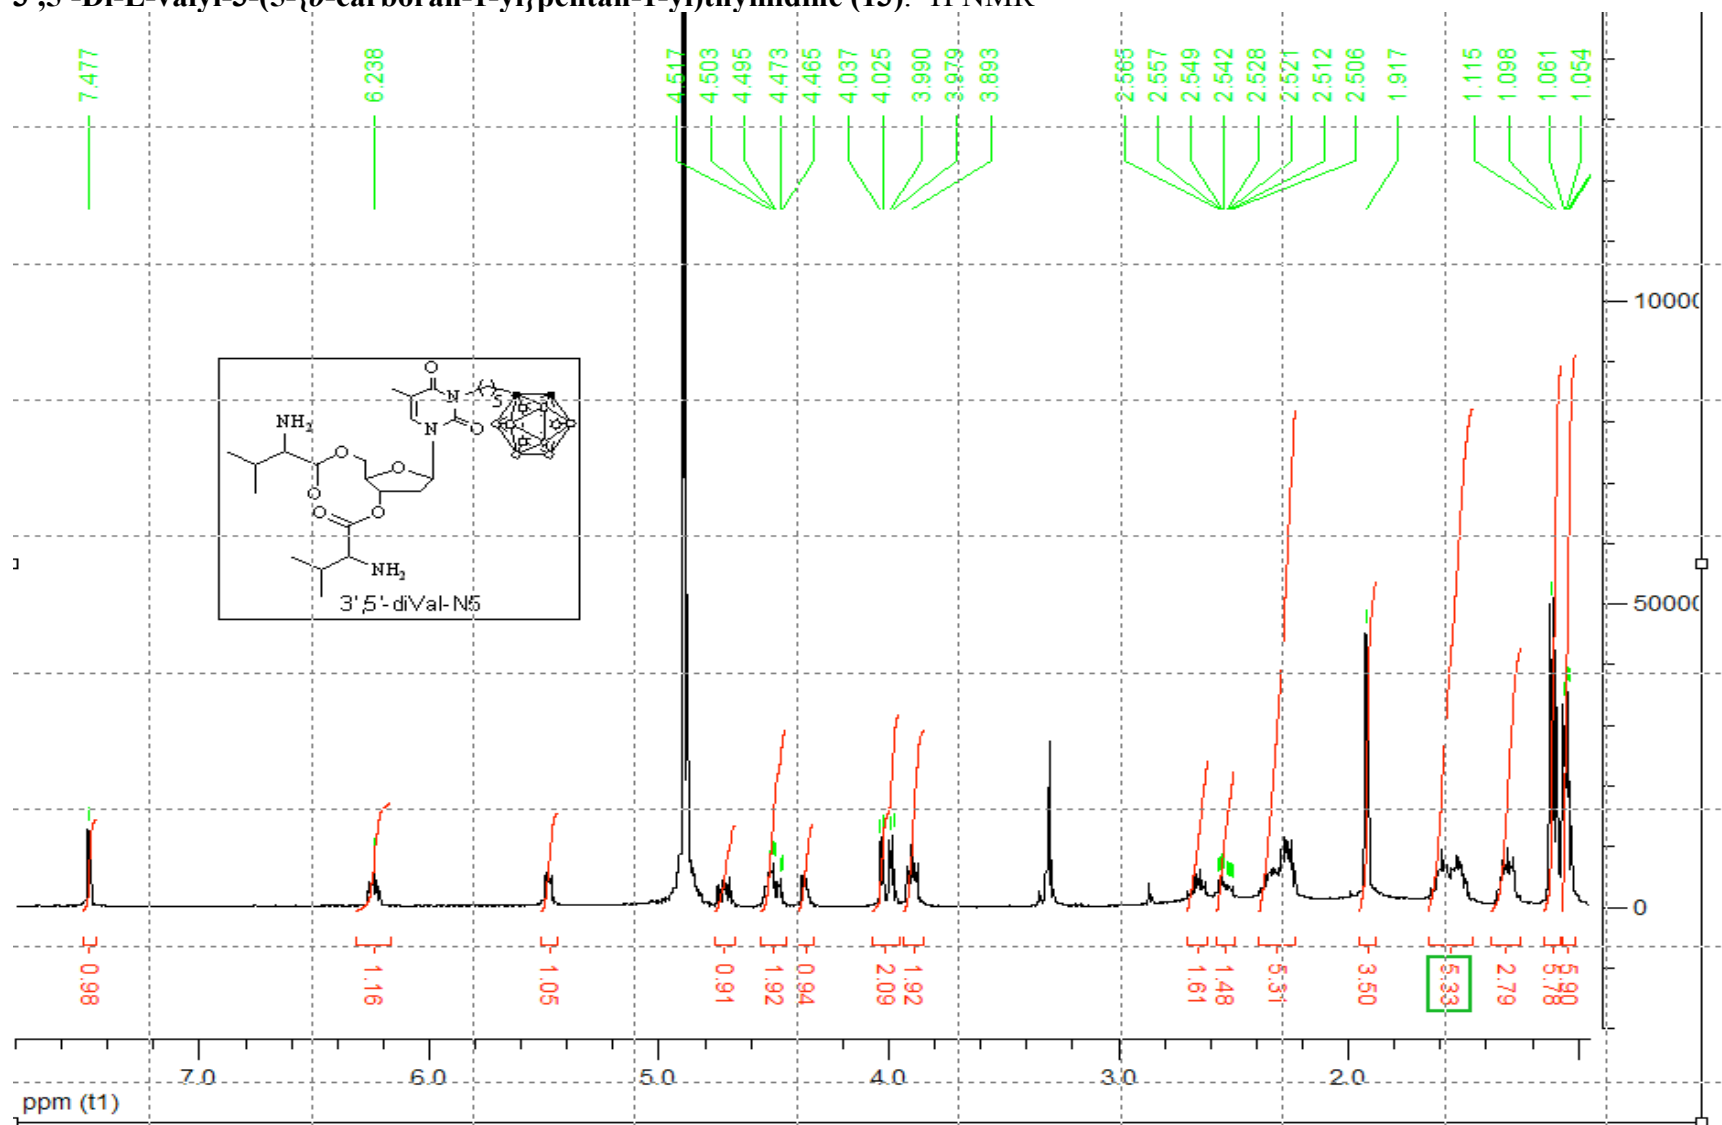

3',5'-Di-L-valyl-3-(5-{*o*-carboran-1-yl}pentn-1-yl)thymidine (13). <sup>13</sup>C NMR

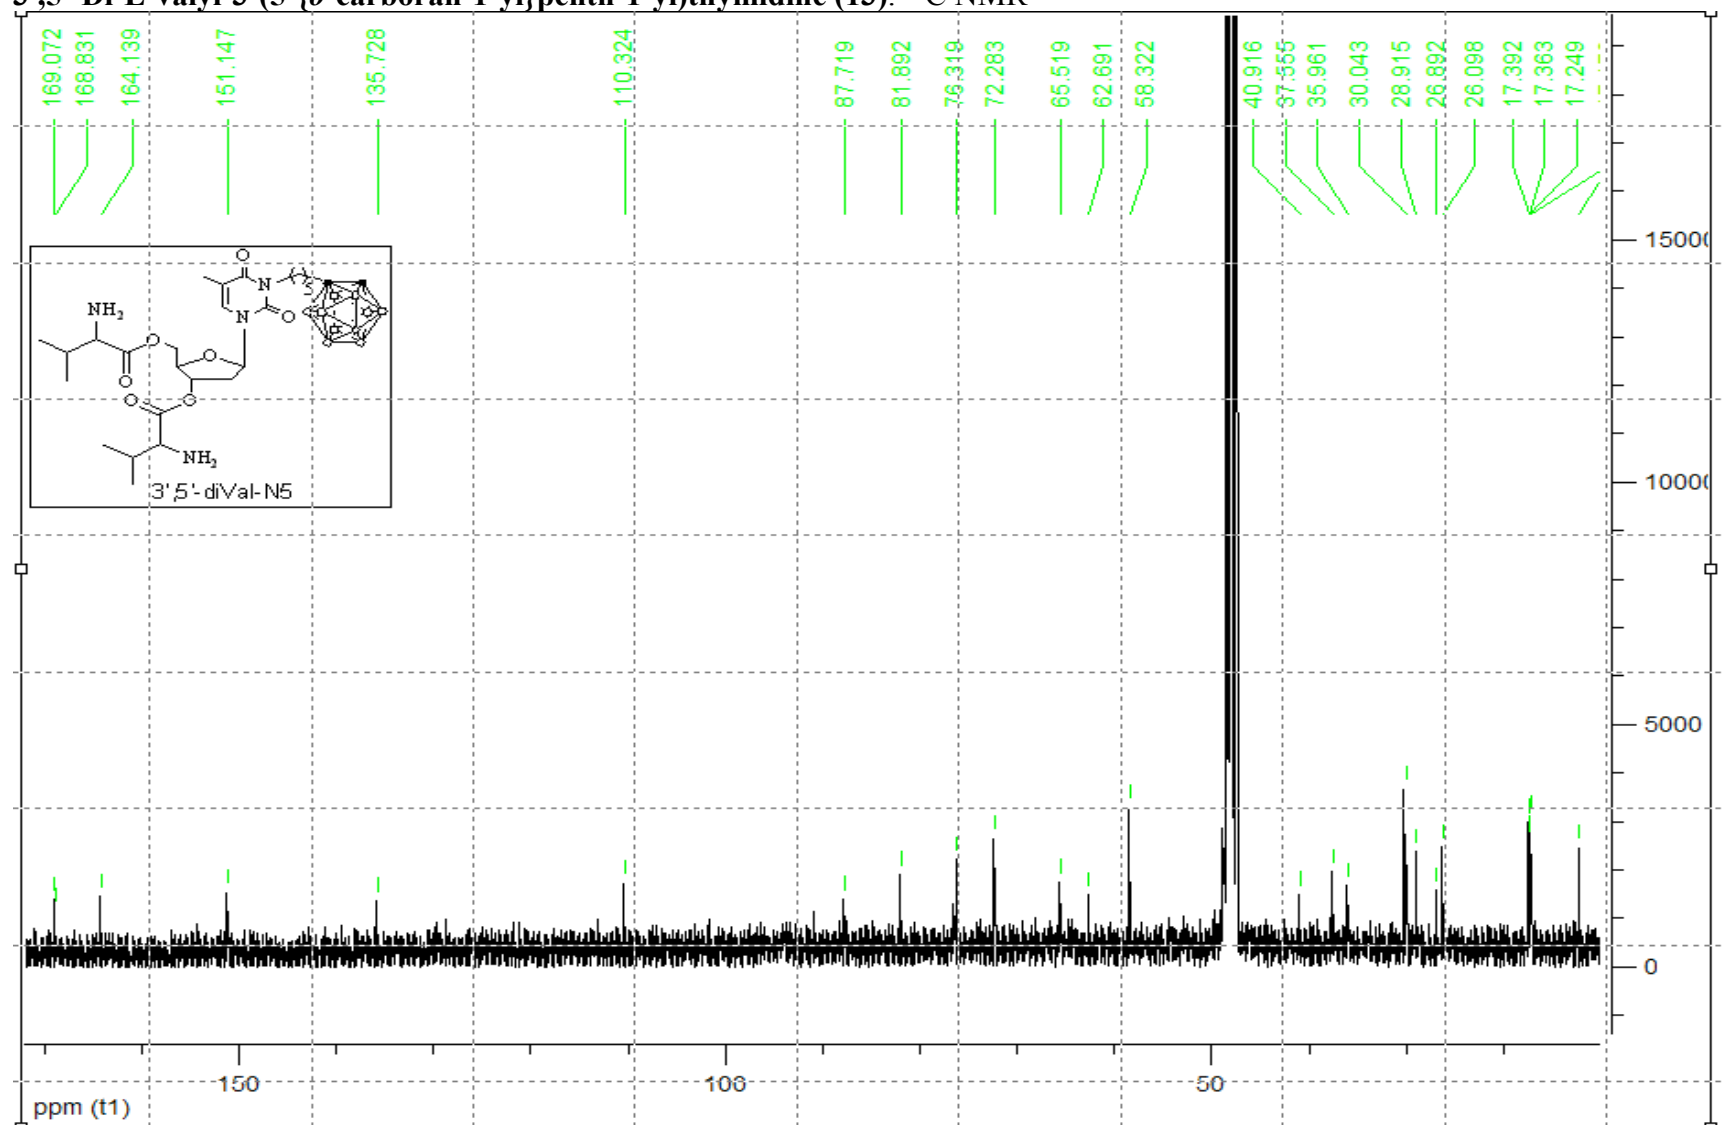

**3',5'-Di-L-valyl-3-(5-{*o*-carboran-1-yl}pentan-1-yl)thymidine (13).** HR-ESI-MS: found:  $m/z$  653.4932.

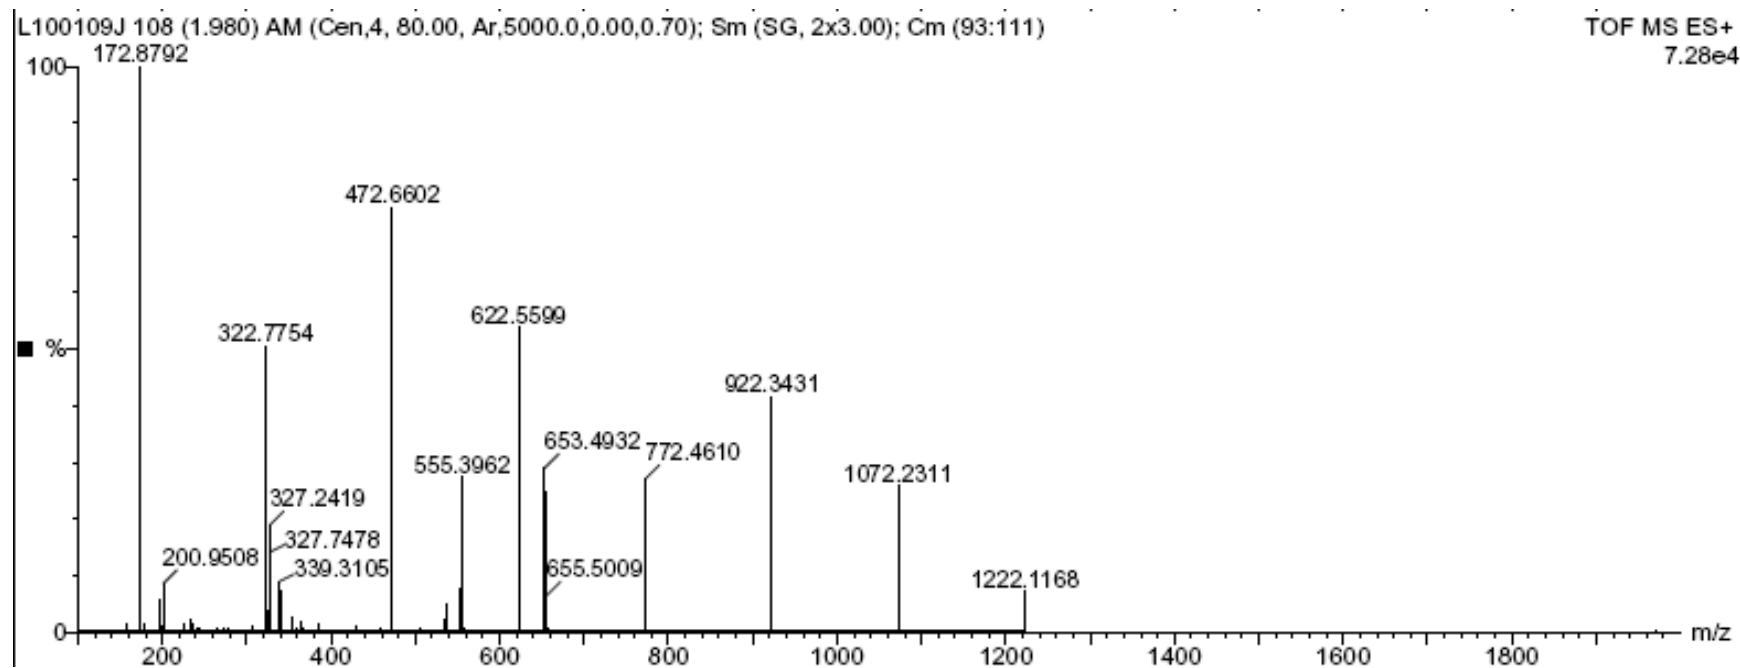

**3',5'-Di-L-valyl-3-(5-{*o*-carboran-1-yl}pentan-1-yl)thymidine (13).** HPLC chromatogram (method A1, Table 3 in manuscript), retention time (13.91).

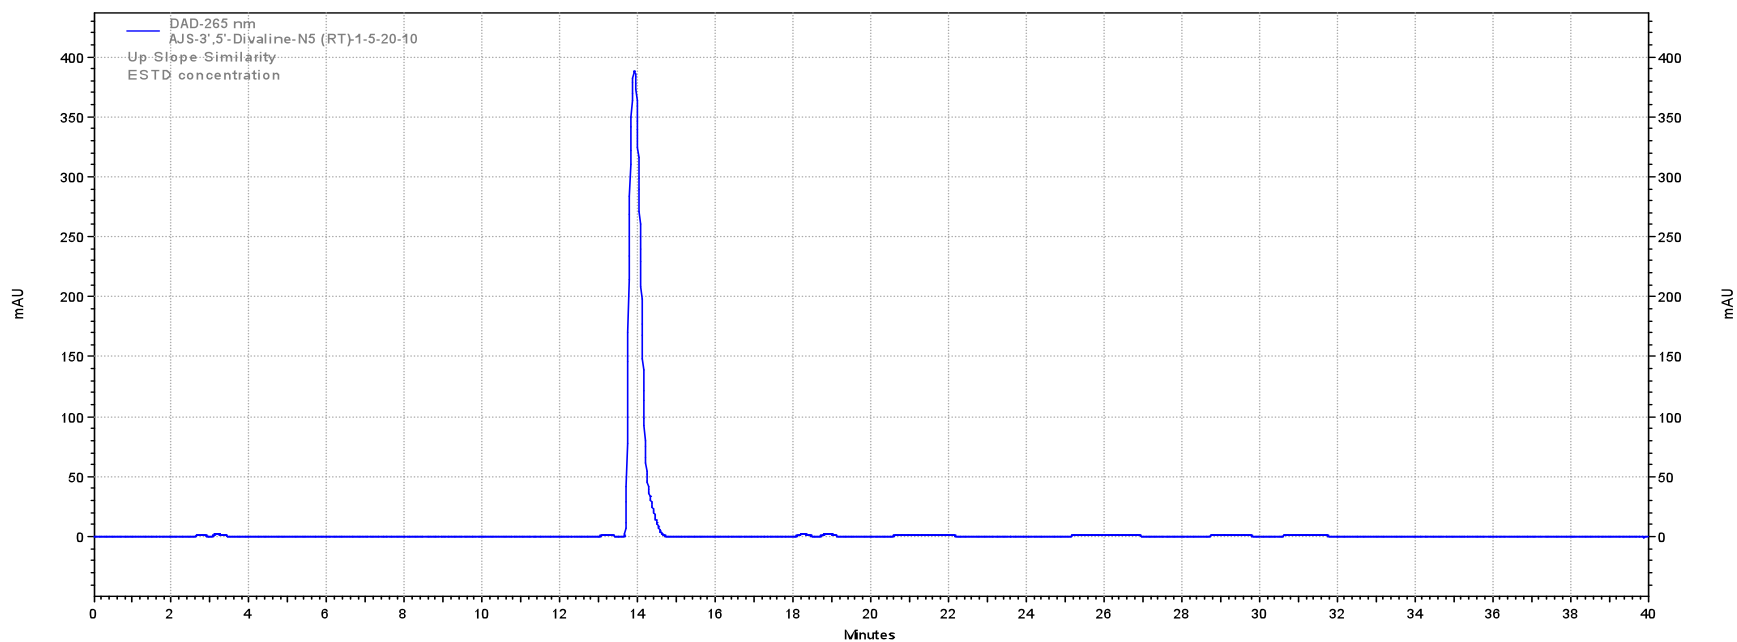

**3',5'-Di-L-valyl-3-(5-{*o*-carboran-1-yl}pentan-1-yl)thymidine (13).** HPLC chromatogram (method B1, Table 3 in manuscript), retention time: 27.63 min.

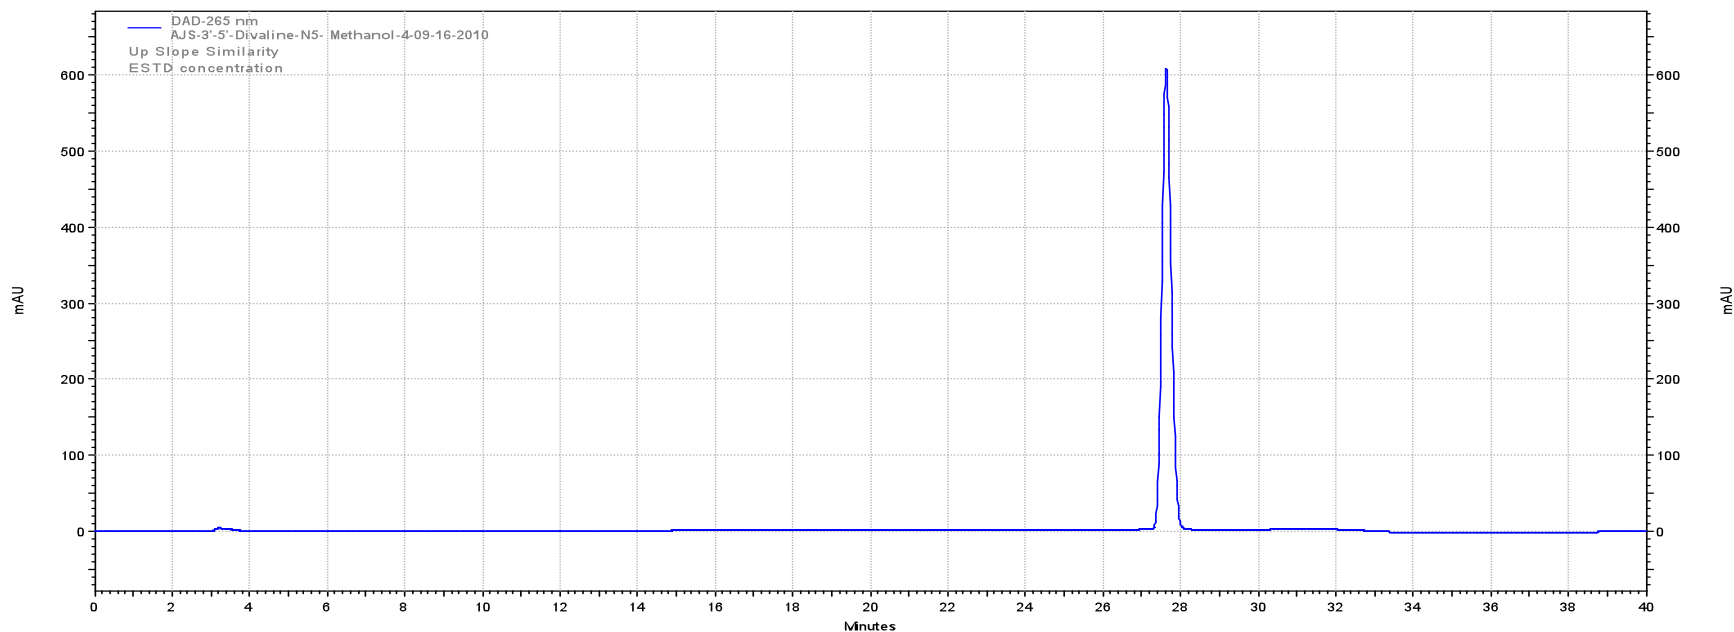

3'-Glycyl-3-(5-{*o*-carboran-1-yl}pentan-1-yl)thymidine (14). <sup>1</sup>H NMR

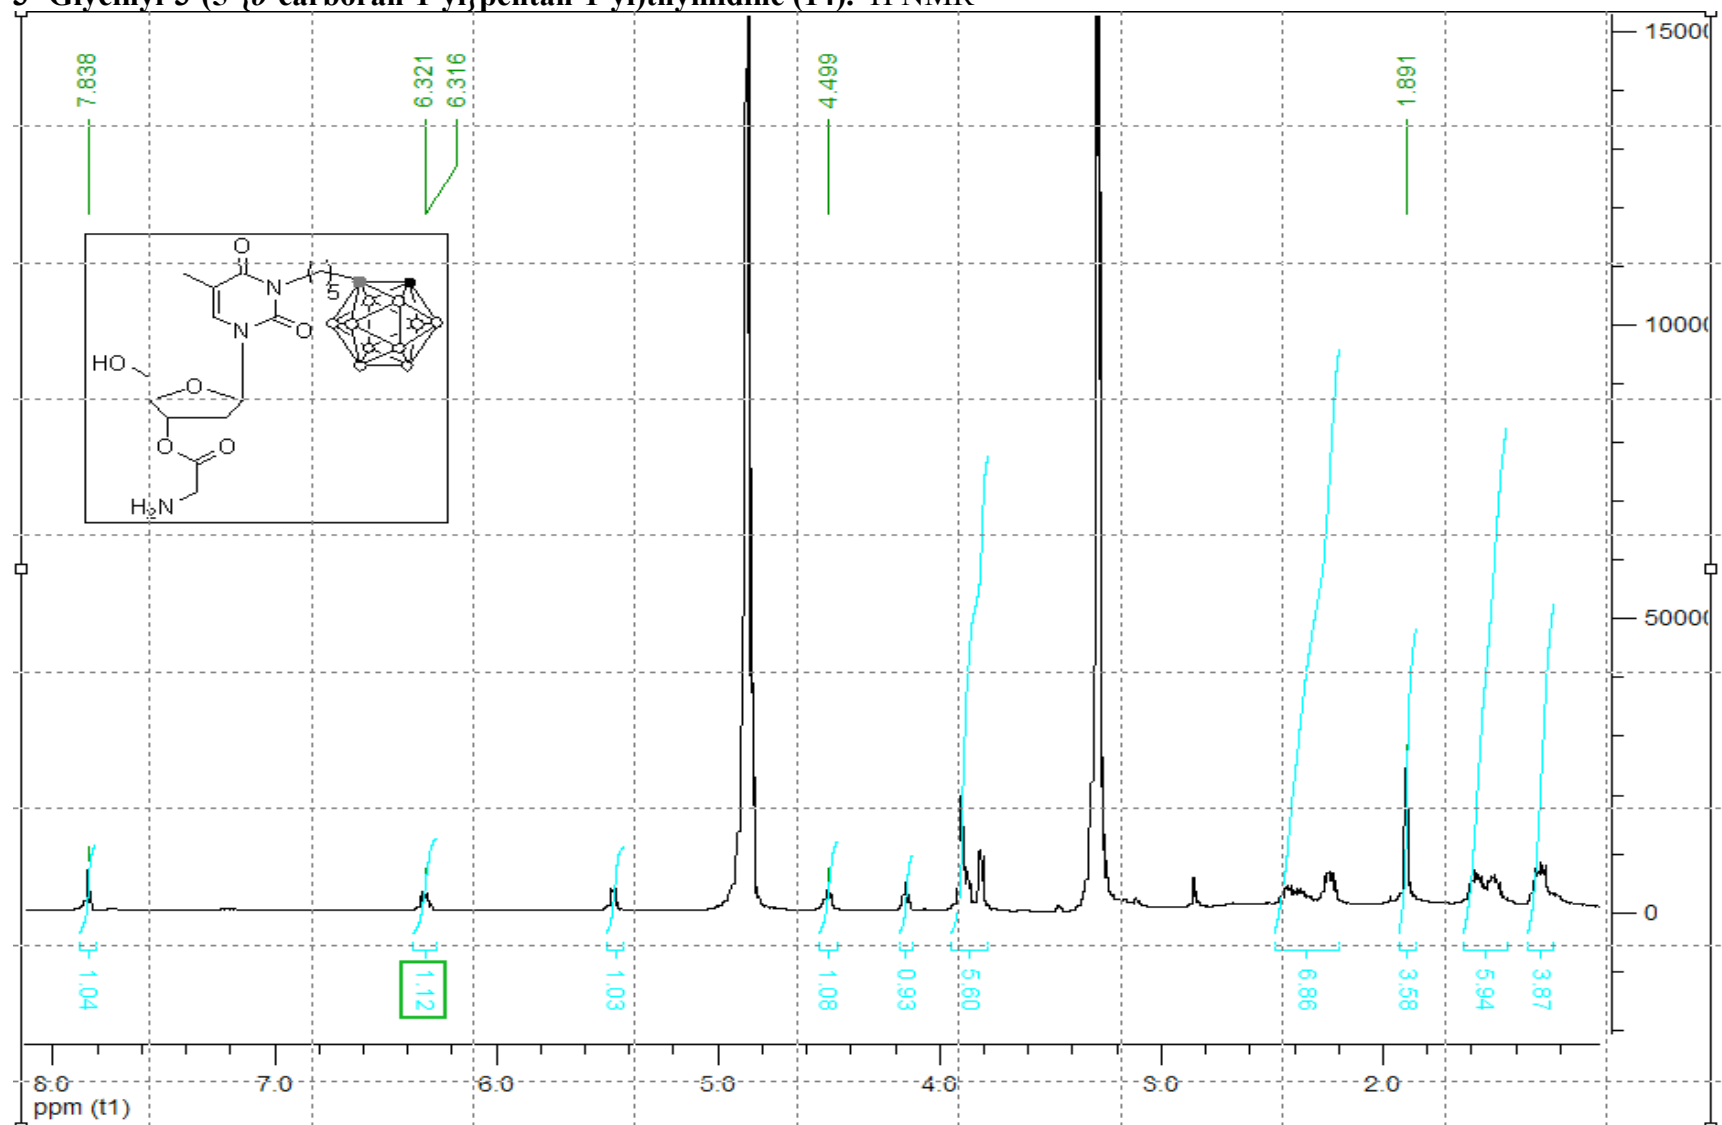

3'-Glycyl-3-(5-{*o*-carboran-1-yl}pentan-1-yl)thymidine (14). <sup>13</sup>C NMR

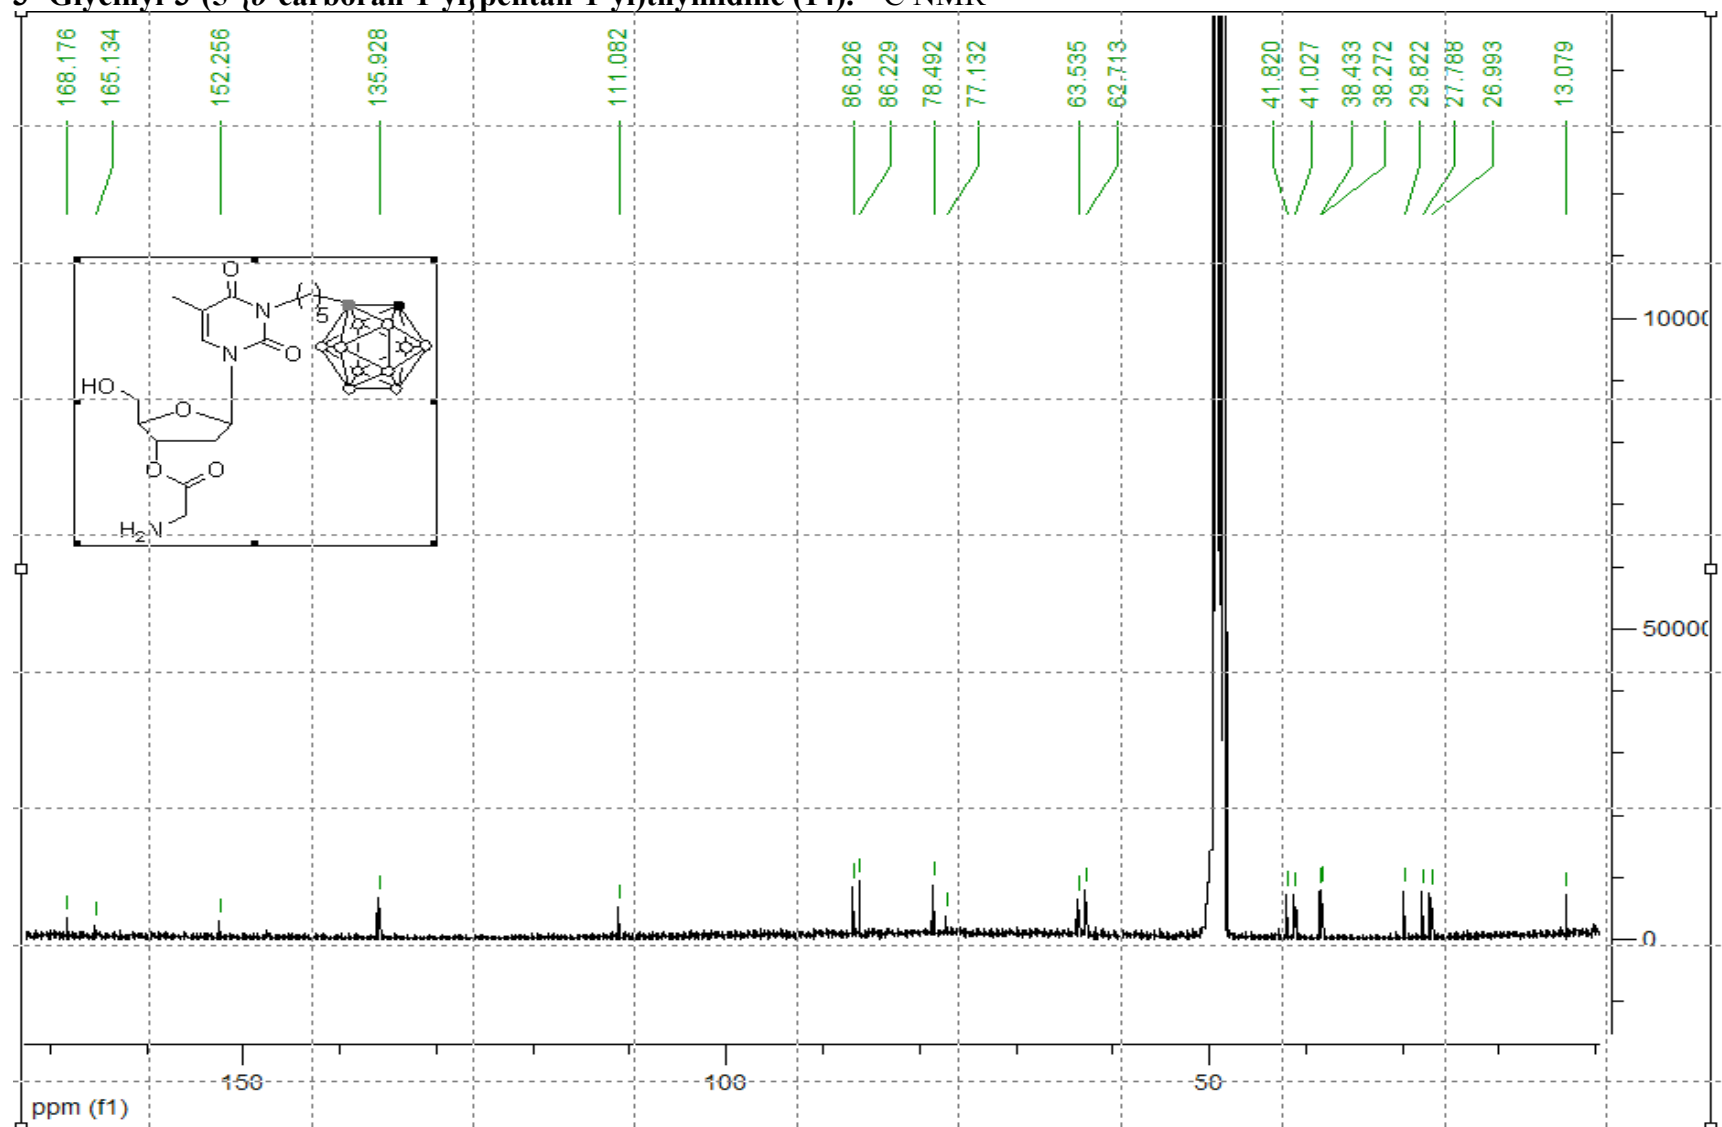

**3'-Glycynyl-3-(5-{*o*-carboran-1-yl}pentan-1-yl)thymidine (14).** HR-ESI-MS: found:  $m/z$  512.5839.

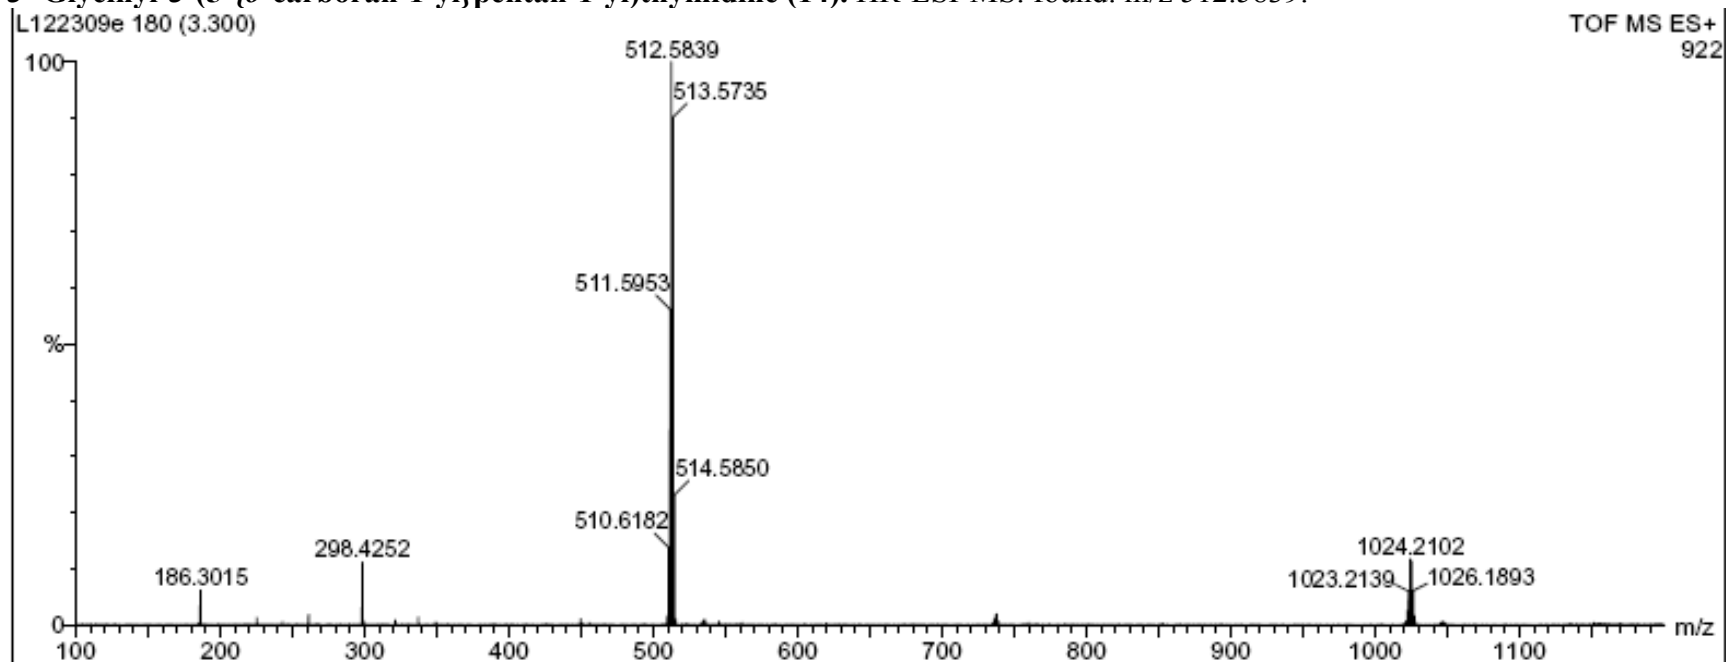



**3'-Glycyl-3-(5-{*o*-carboran-1-yl}pentan-1-yl)thymidine (14).** HPLC chromatogram (method A2, Table 3 in manuscript), retention time: 18.43 min.

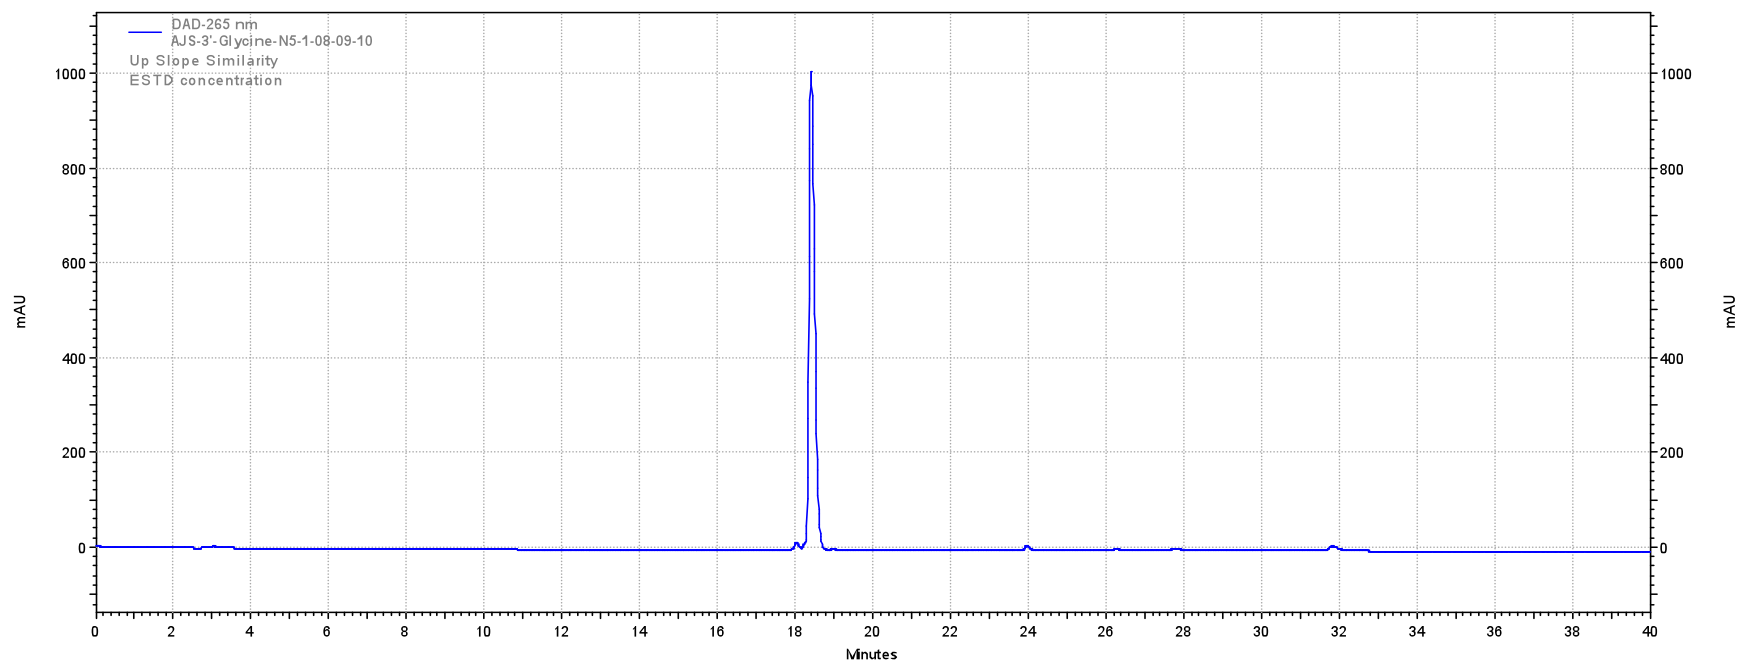

**3'-Glyciny-3-(5-{*o*-carboran-1-yl}pentan-1-yl)thymidine (14).** HPLC chromatogram (method B2, Table 3 in manuscript), retention time: 30.61min.

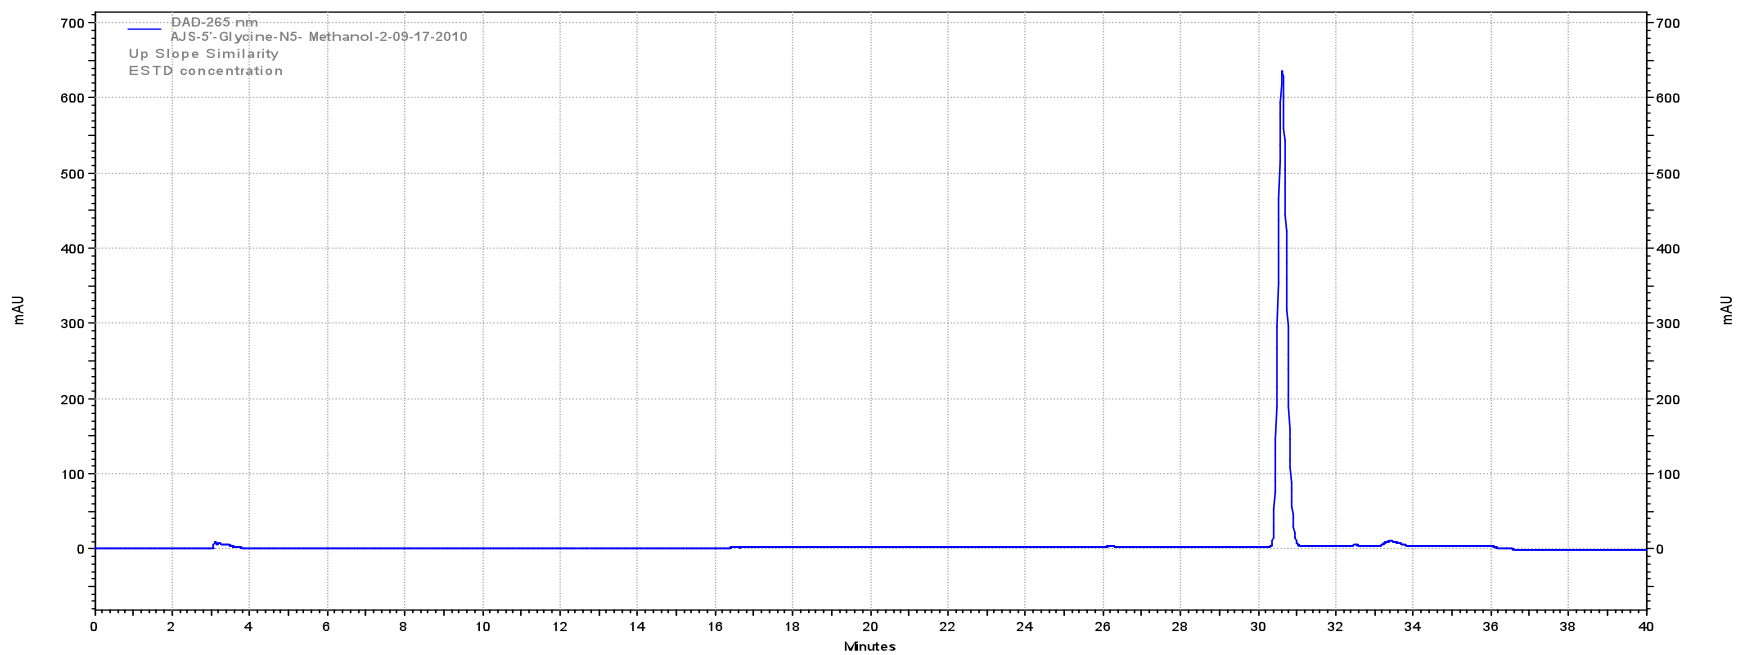

5'-Glycyl-3-(5-{*o*-carboran-1-yl}pentan-1-yl)thymidine (15). <sup>1</sup>H NMR

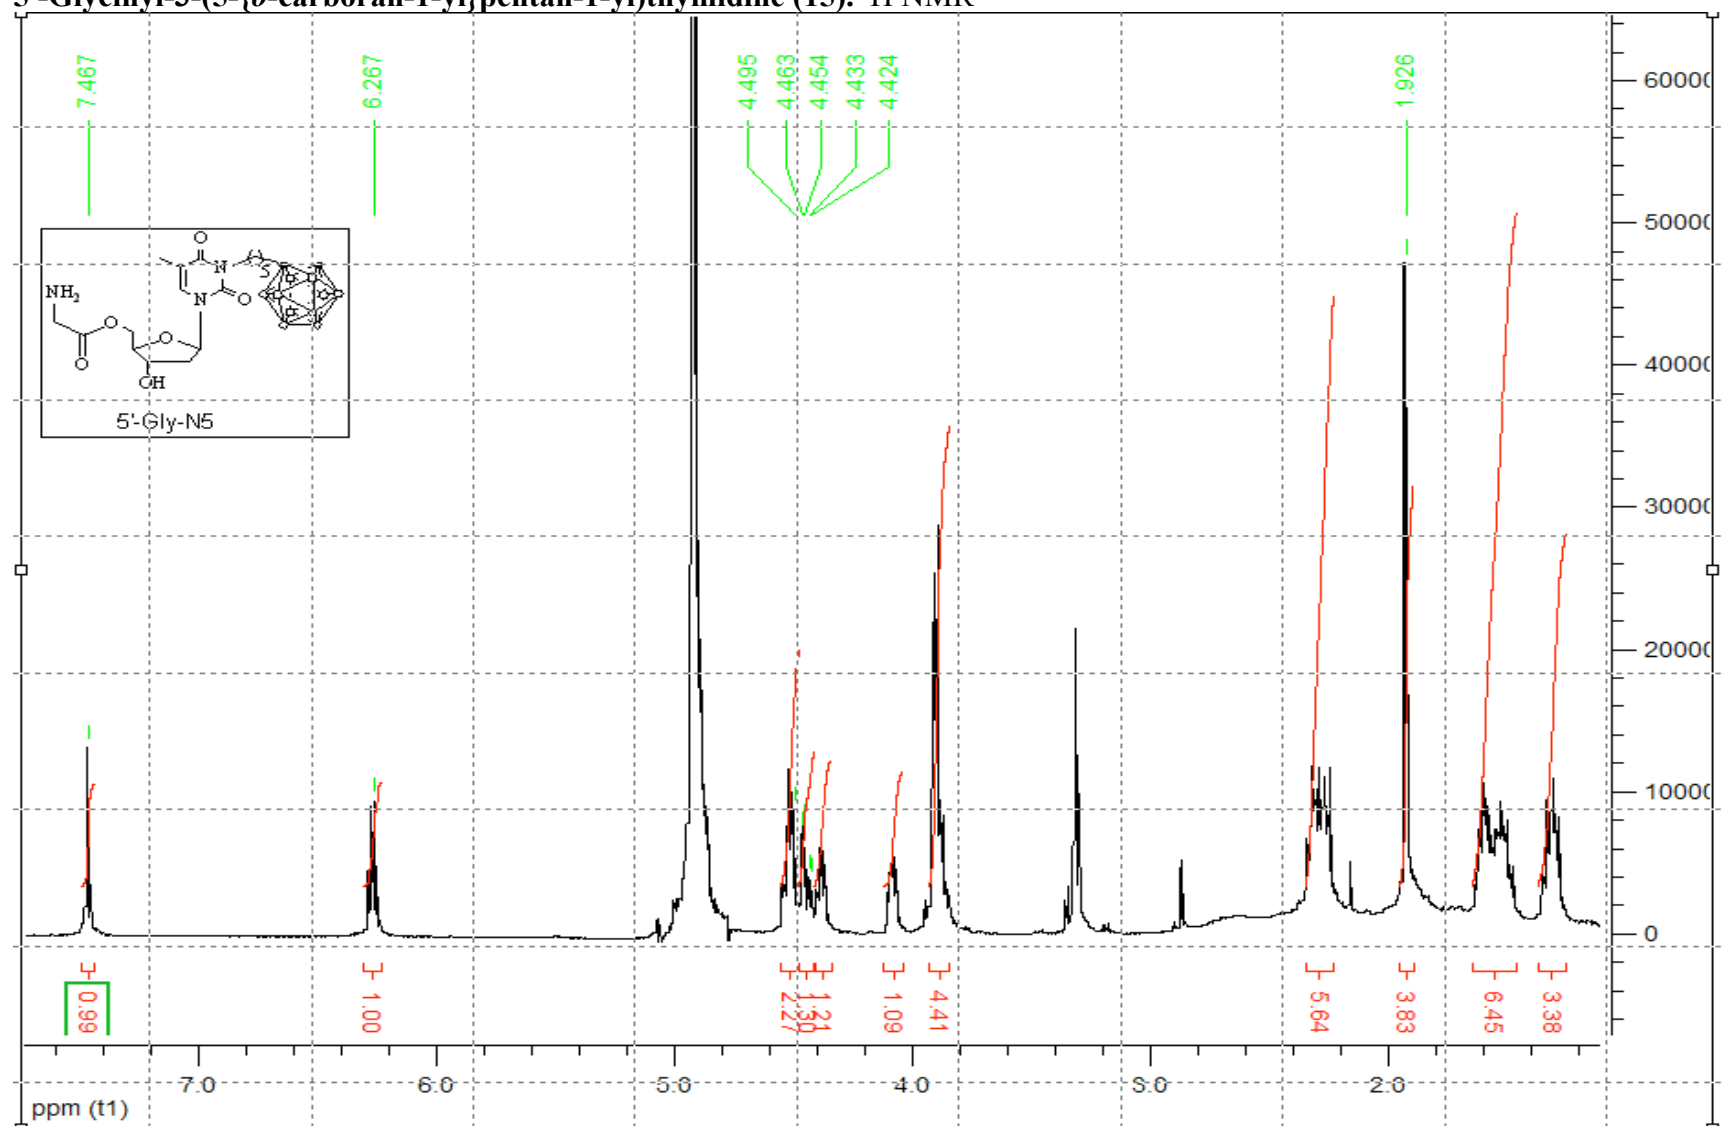

5'-Glycyl-3-(5-{*o*-carboran-1-yl}pentan-1-yl)thymidine (15). <sup>13</sup>C NMR

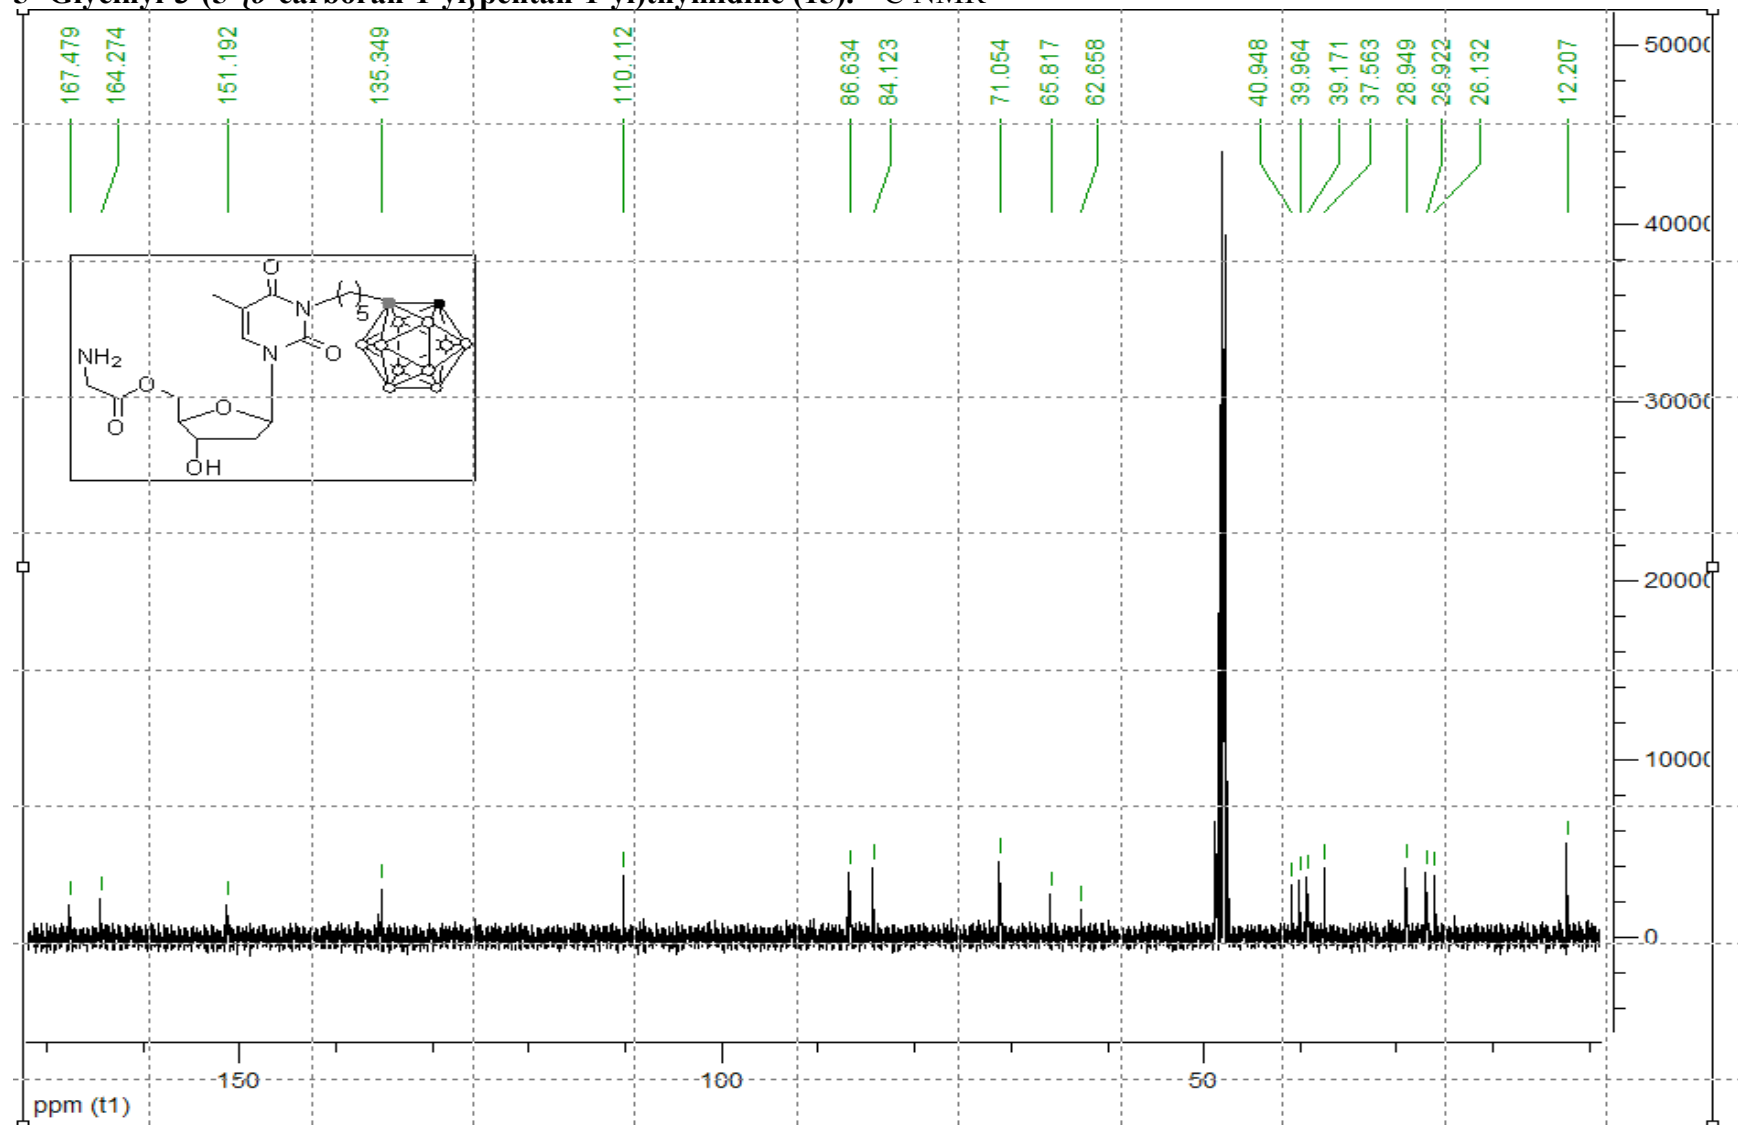

**5'-Glycyl-3-(5-*o*-carboran-1-yl)pentan-1-yl)thymidine (15).** HR-ESI-MS: found: m/z 512.3798.

L122309e 386 (7.080) AM (Cen,4, 80.00, Ar,5000.0,0.00,0.70); Sm (SG, 2x3.00); Cm (369:436)

TOF MS ES+  
6.67e4

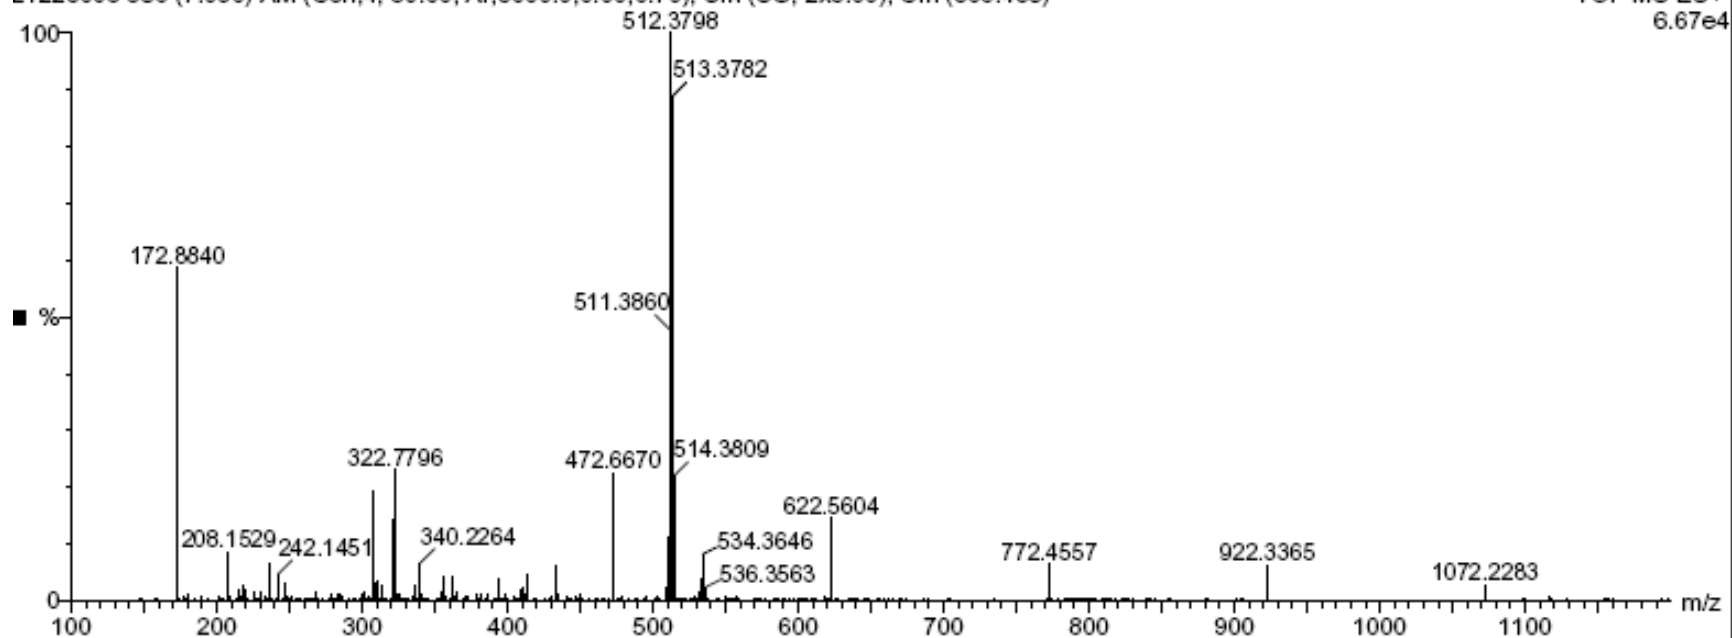

**5'-Glycinyl-3-(5-{*o*-carboran-1-yl}pentan-1-yl)thymidine (15).** HPLC chromatogram (method A2, Table 3 in manuscript), retention time: 17.57 min.

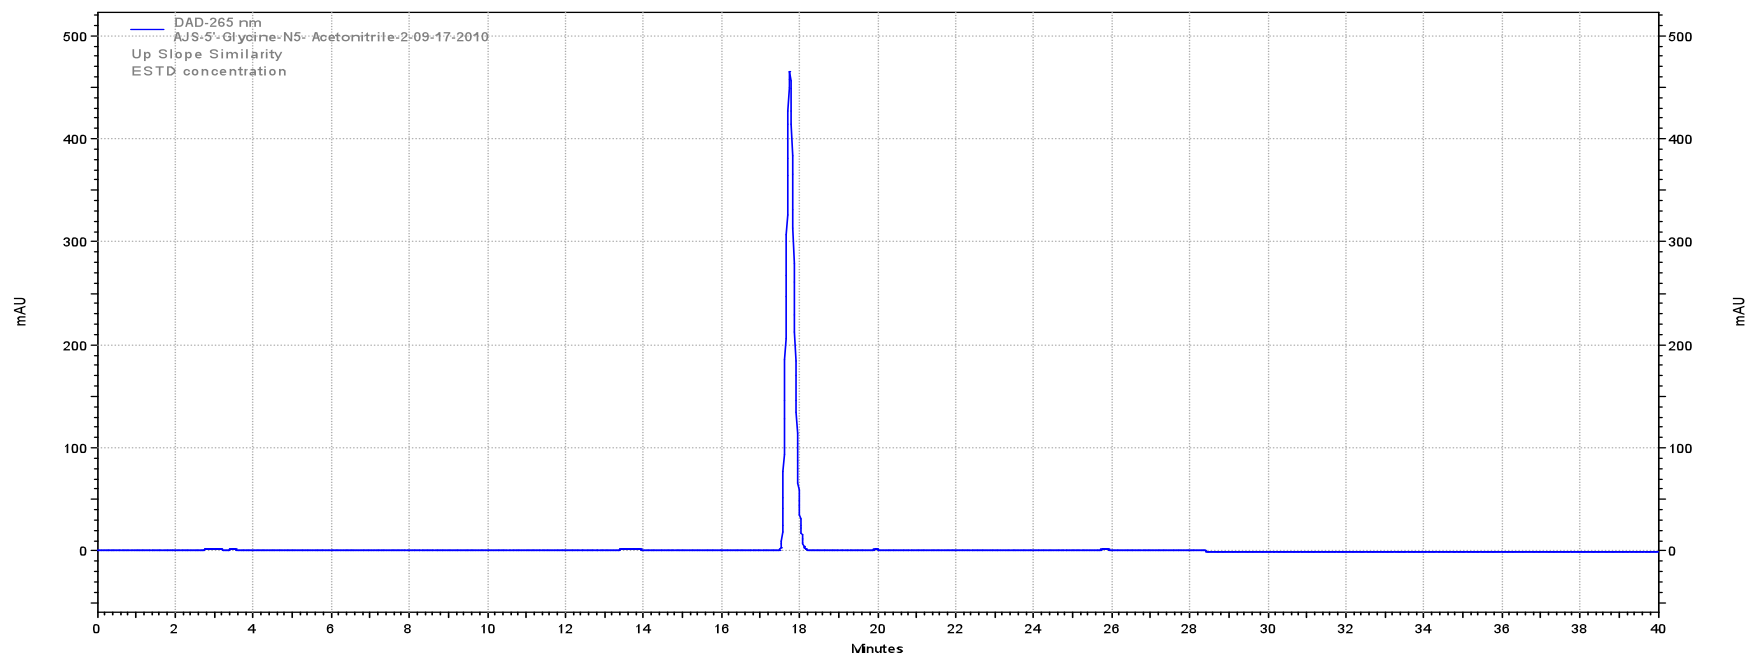

**5'-Glycinyl-3-(5-{*o*-carboran-1-yl}pentan-1-yl)thymidine (15).** HPLC chromatogram (method B2, Table 3 in manuscript), retention time: 30.40 min.

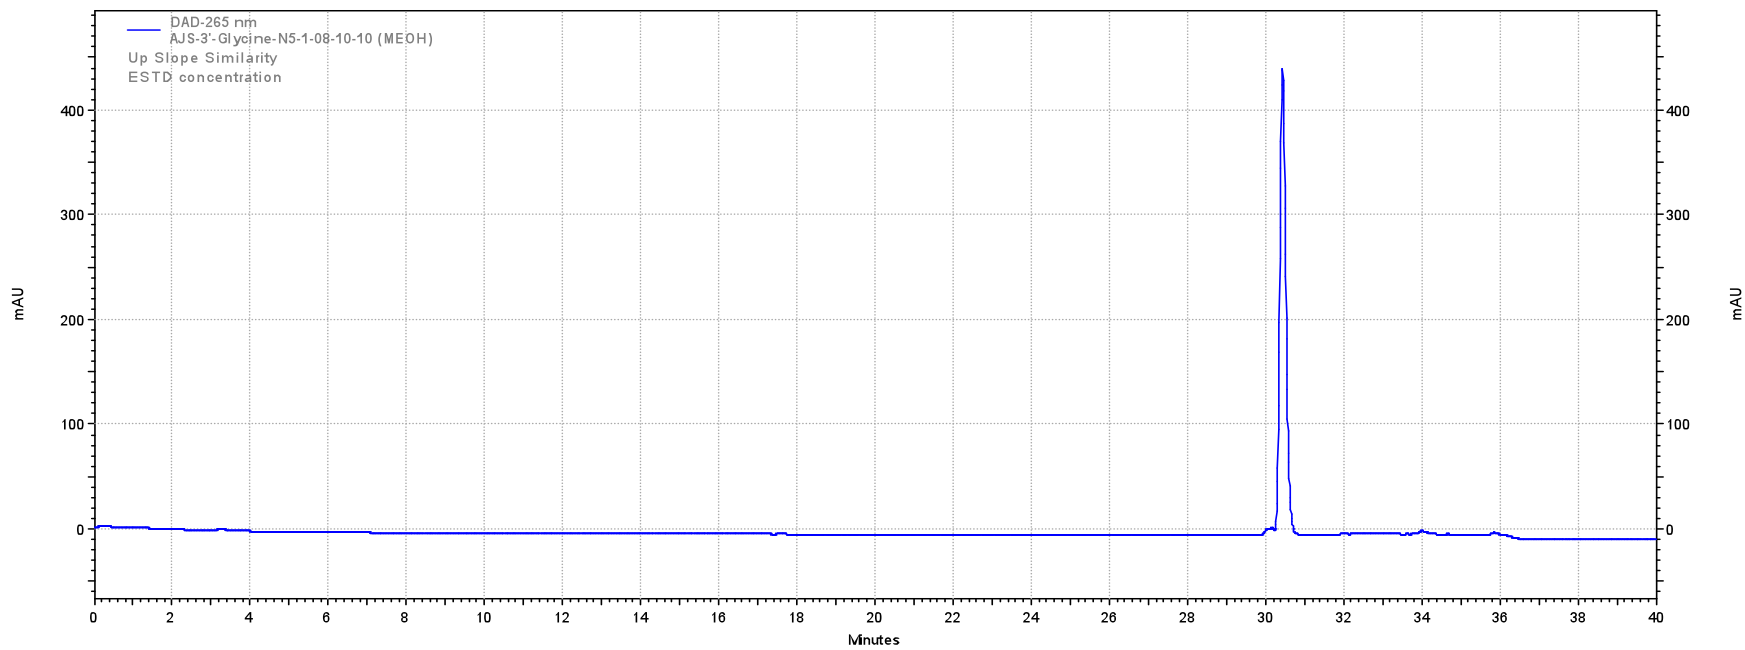

3',5'-Di-glycinyl-3-(5-{*o*-carboran-1-yl}pentan-1-yl)thymidine (16). <sup>1</sup>H NMR

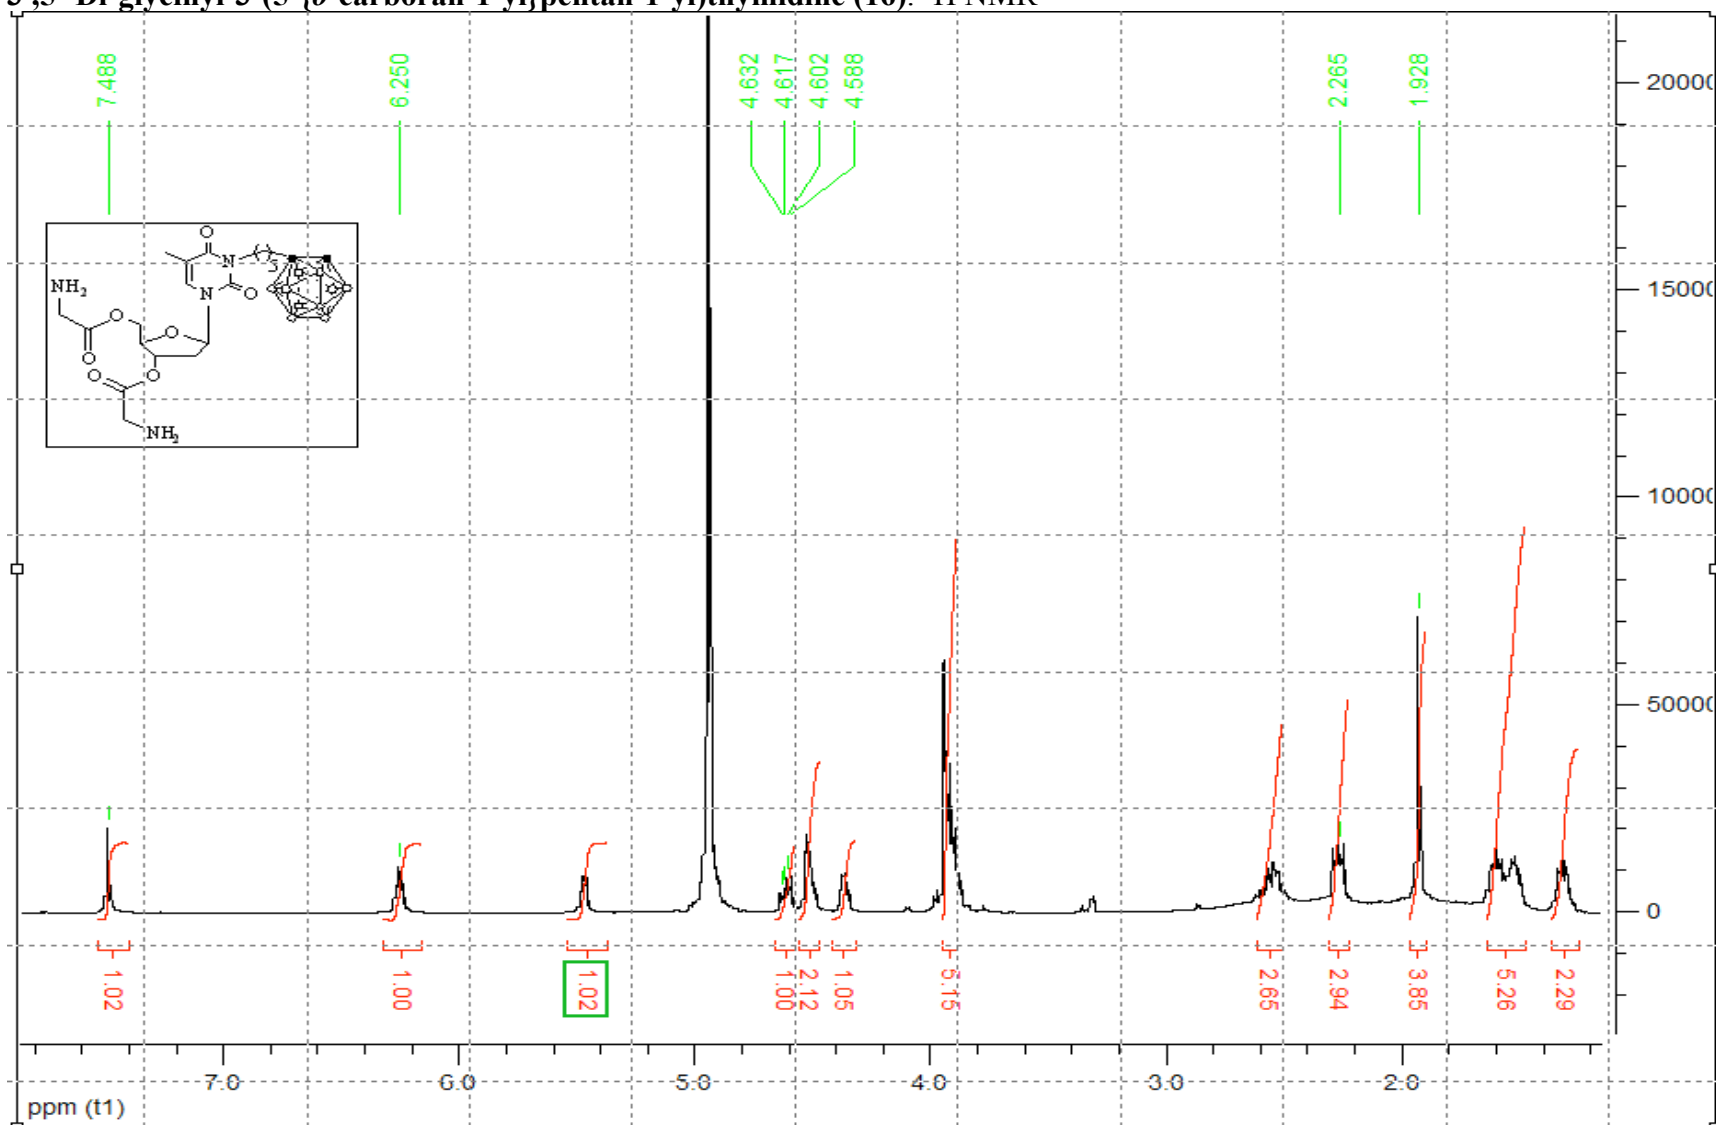



3',5'-Di-glycinyl-3-(5-{*o*-carboran-1-yl}pentan-1-yl)thymidine (16). <sup>13</sup>C NMR

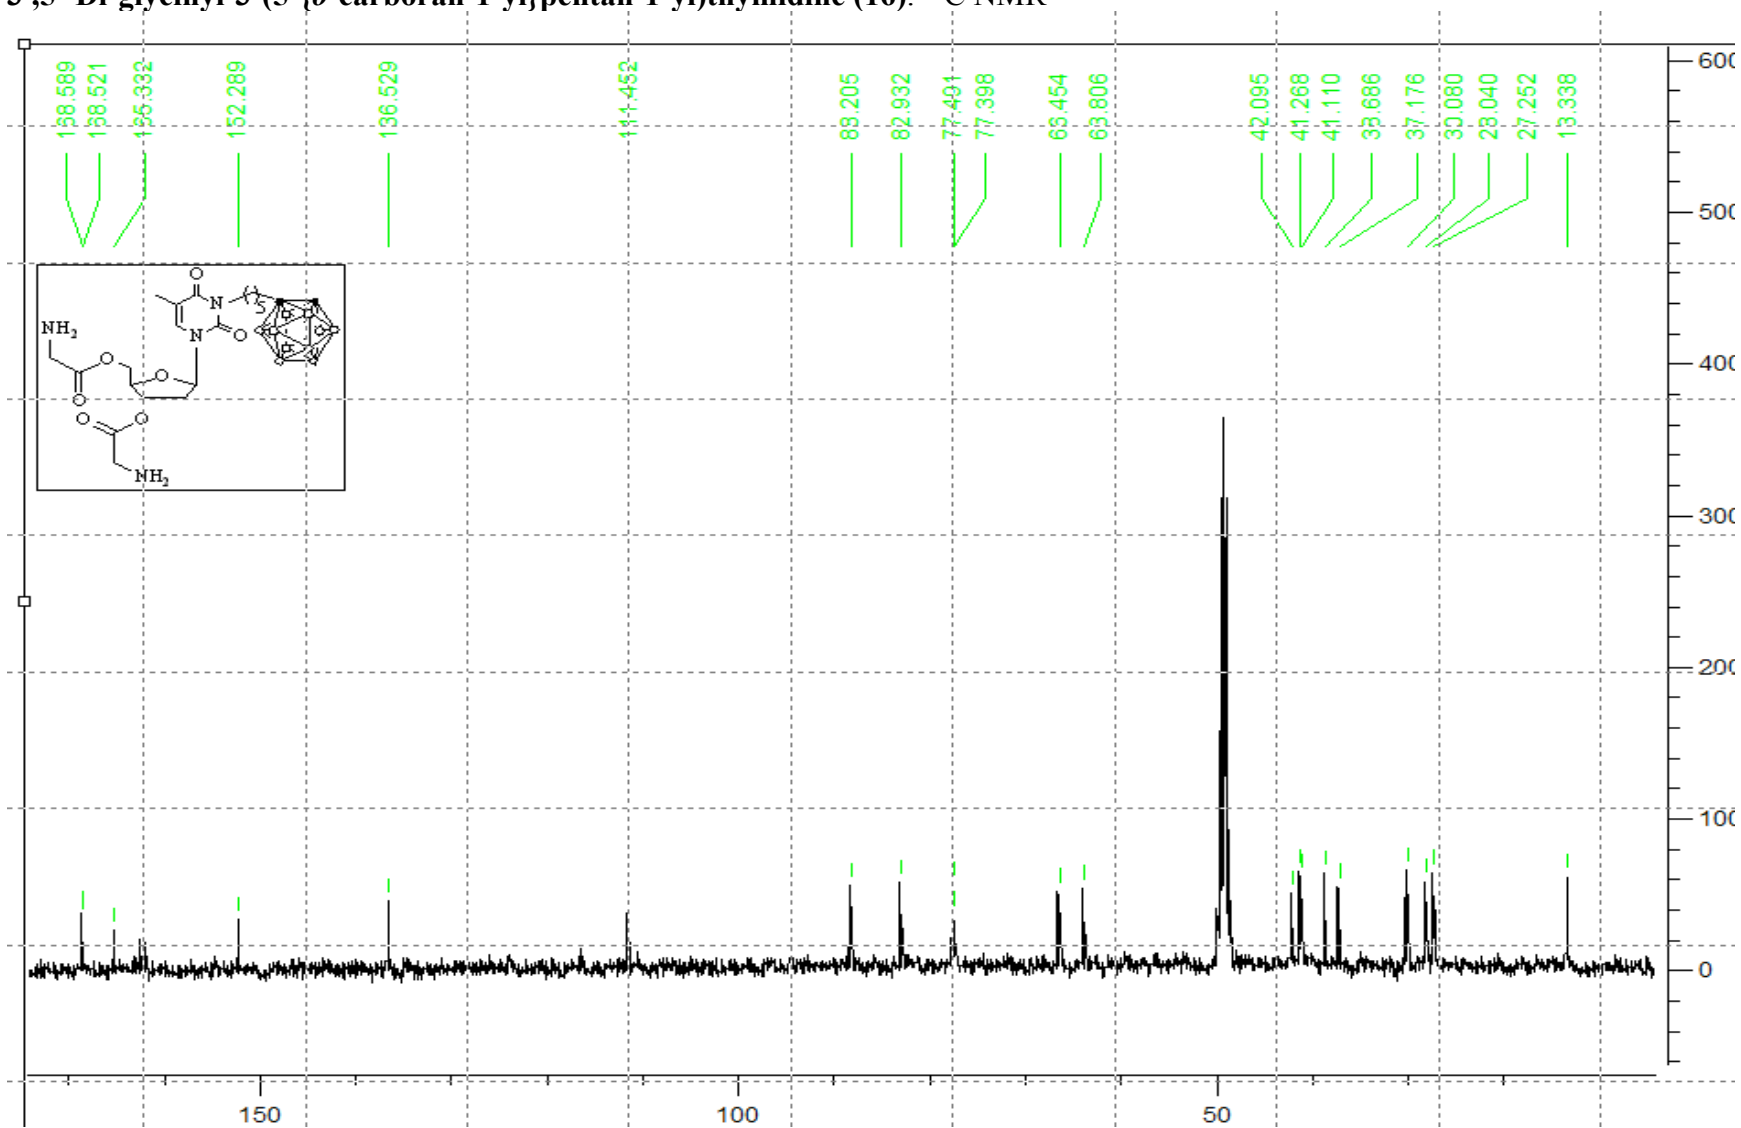

**3',5'-Di-glycinyl-3-(5-{*o*-carboran-1-yl}pentan-1-yl)thymidine (16).** HR-ESI-MS: found:  $m/z$  569.3975.

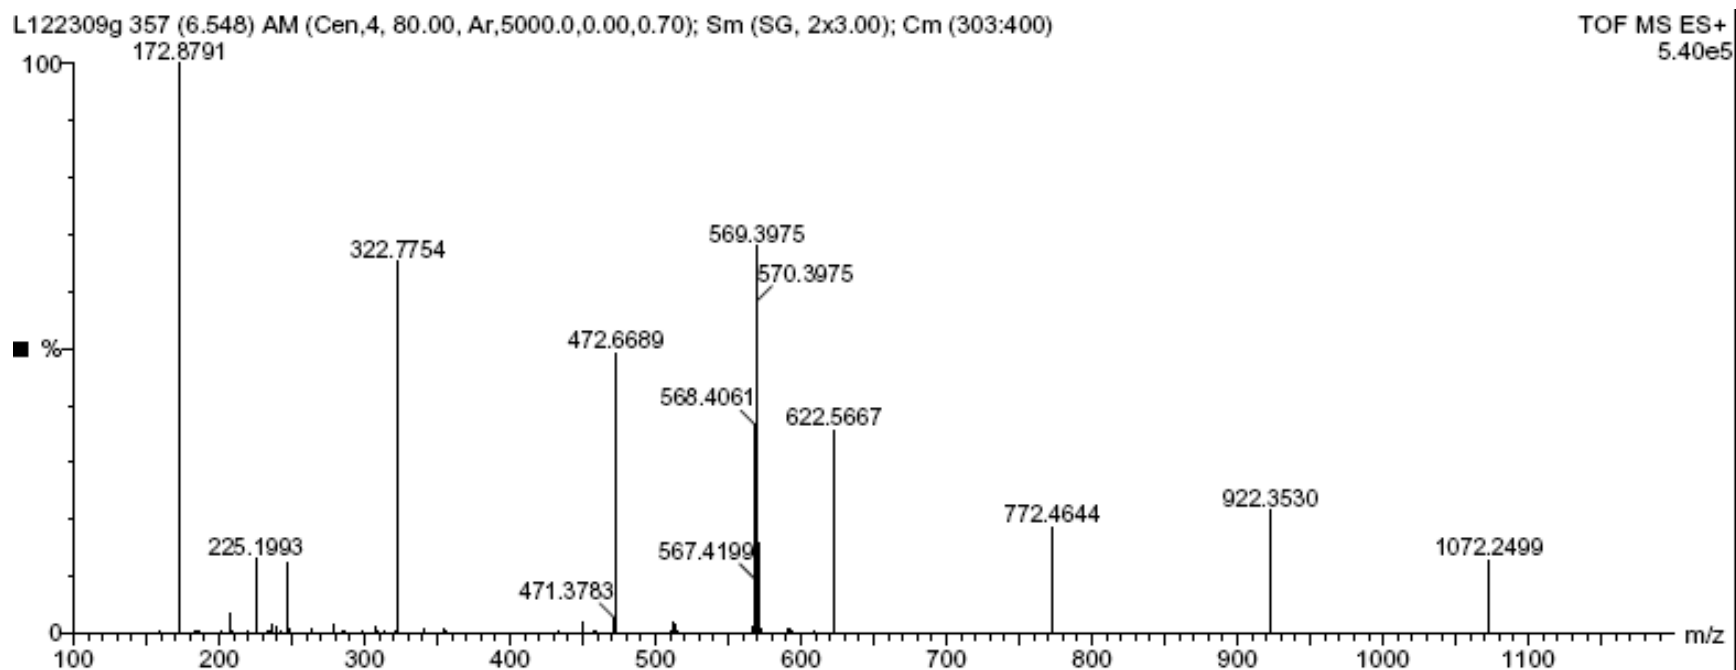

**3',5'-Di-glycinyl-3-(5-{*o*-carboran-1-yl}pentan-1-yl)thymidine (16).** HPLC chromatogram (method A2, Table 3 in manuscript), retention time: 14.67 min.

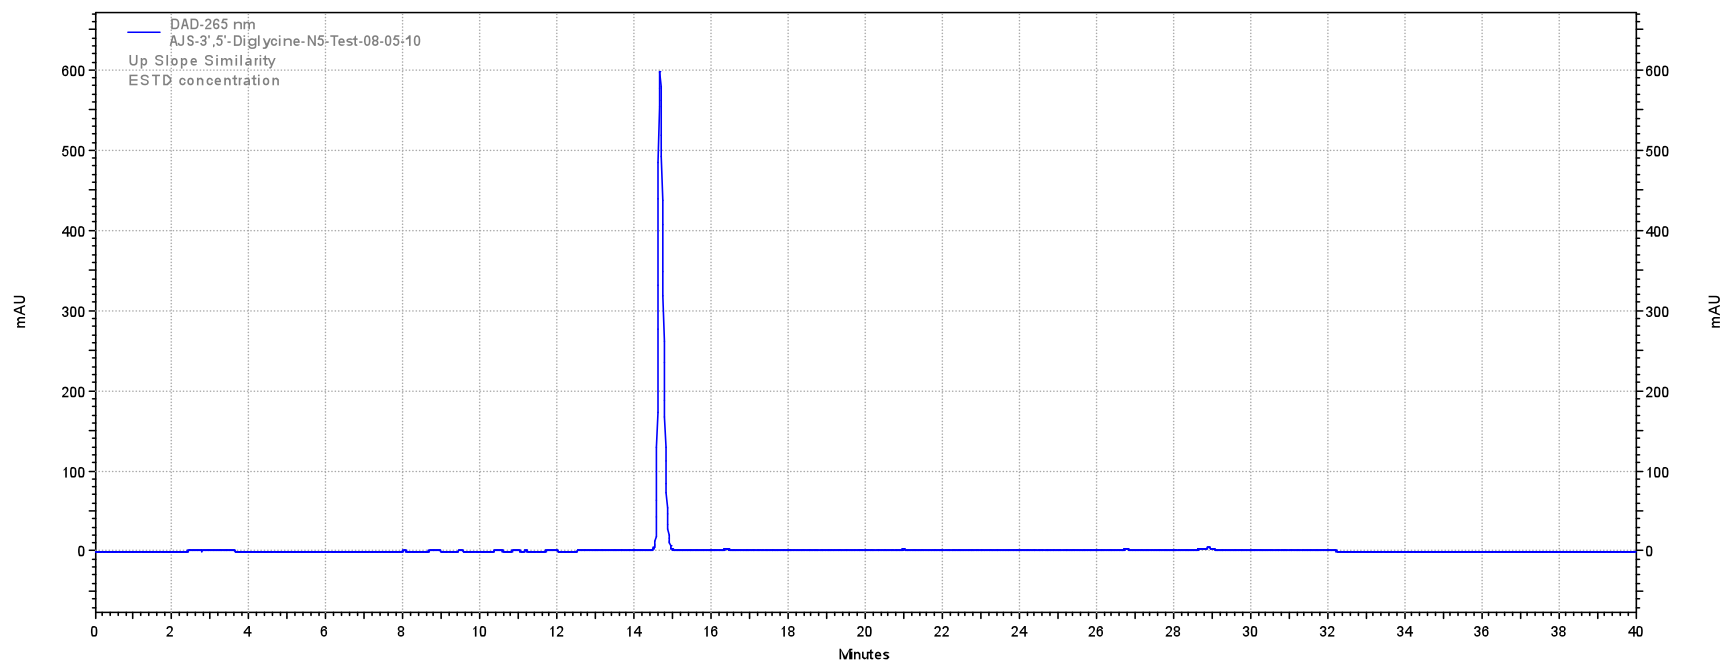

**3',5'-Di-glycinyl-3-(5-{*o*-carboran-1-yl}pentan-1-yl)thymidine (16).** HPLC chromatogram (method B2, Table 3 in manuscript), retention time: 26.45 min.

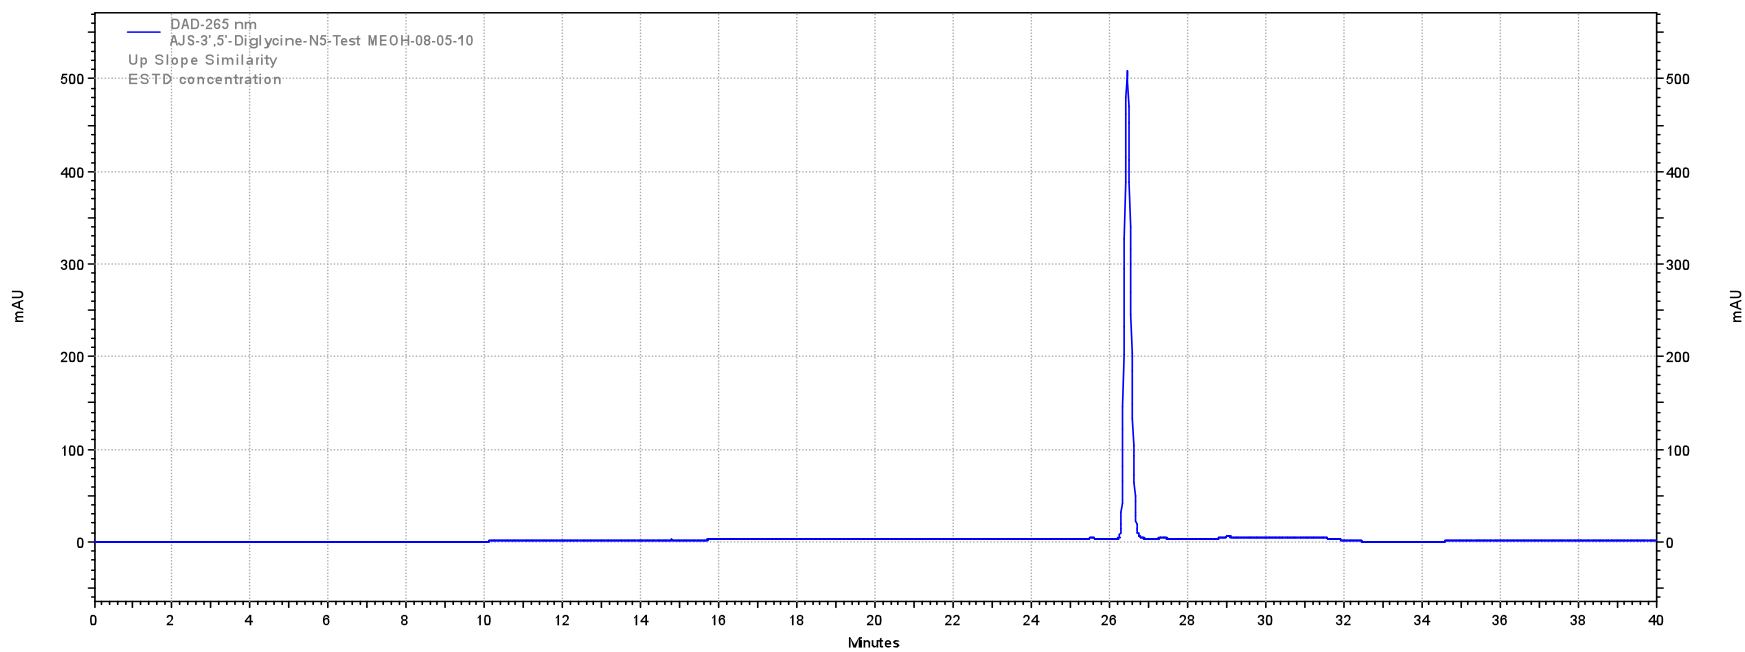

3'-L-Glutam-5-yl-3-(5-{*o*-carboran-1-yl}pentan-1-yl)thymidine (17). <sup>1</sup>H NMR

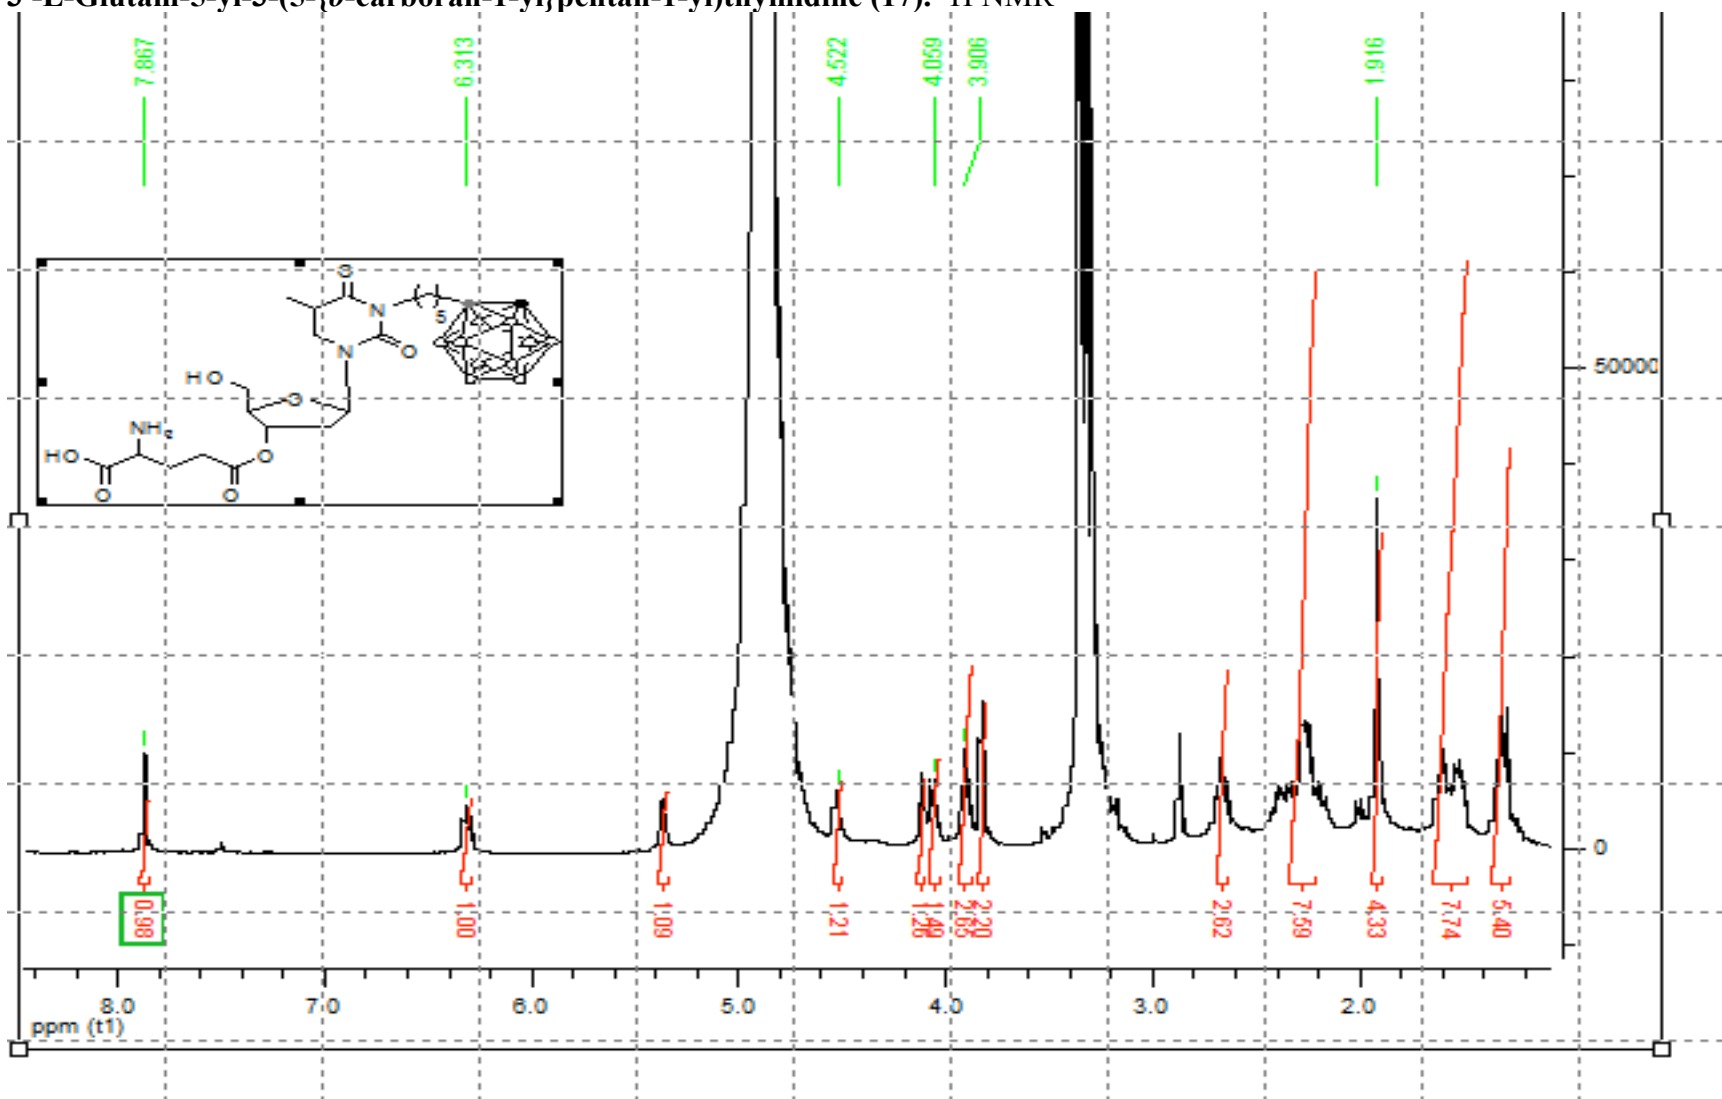

3'-L-Glutam-5-yl-3-(5-{*o*-carboran-1-yl}pentan-1-yl)thymidine (17). <sup>13</sup>C NMR

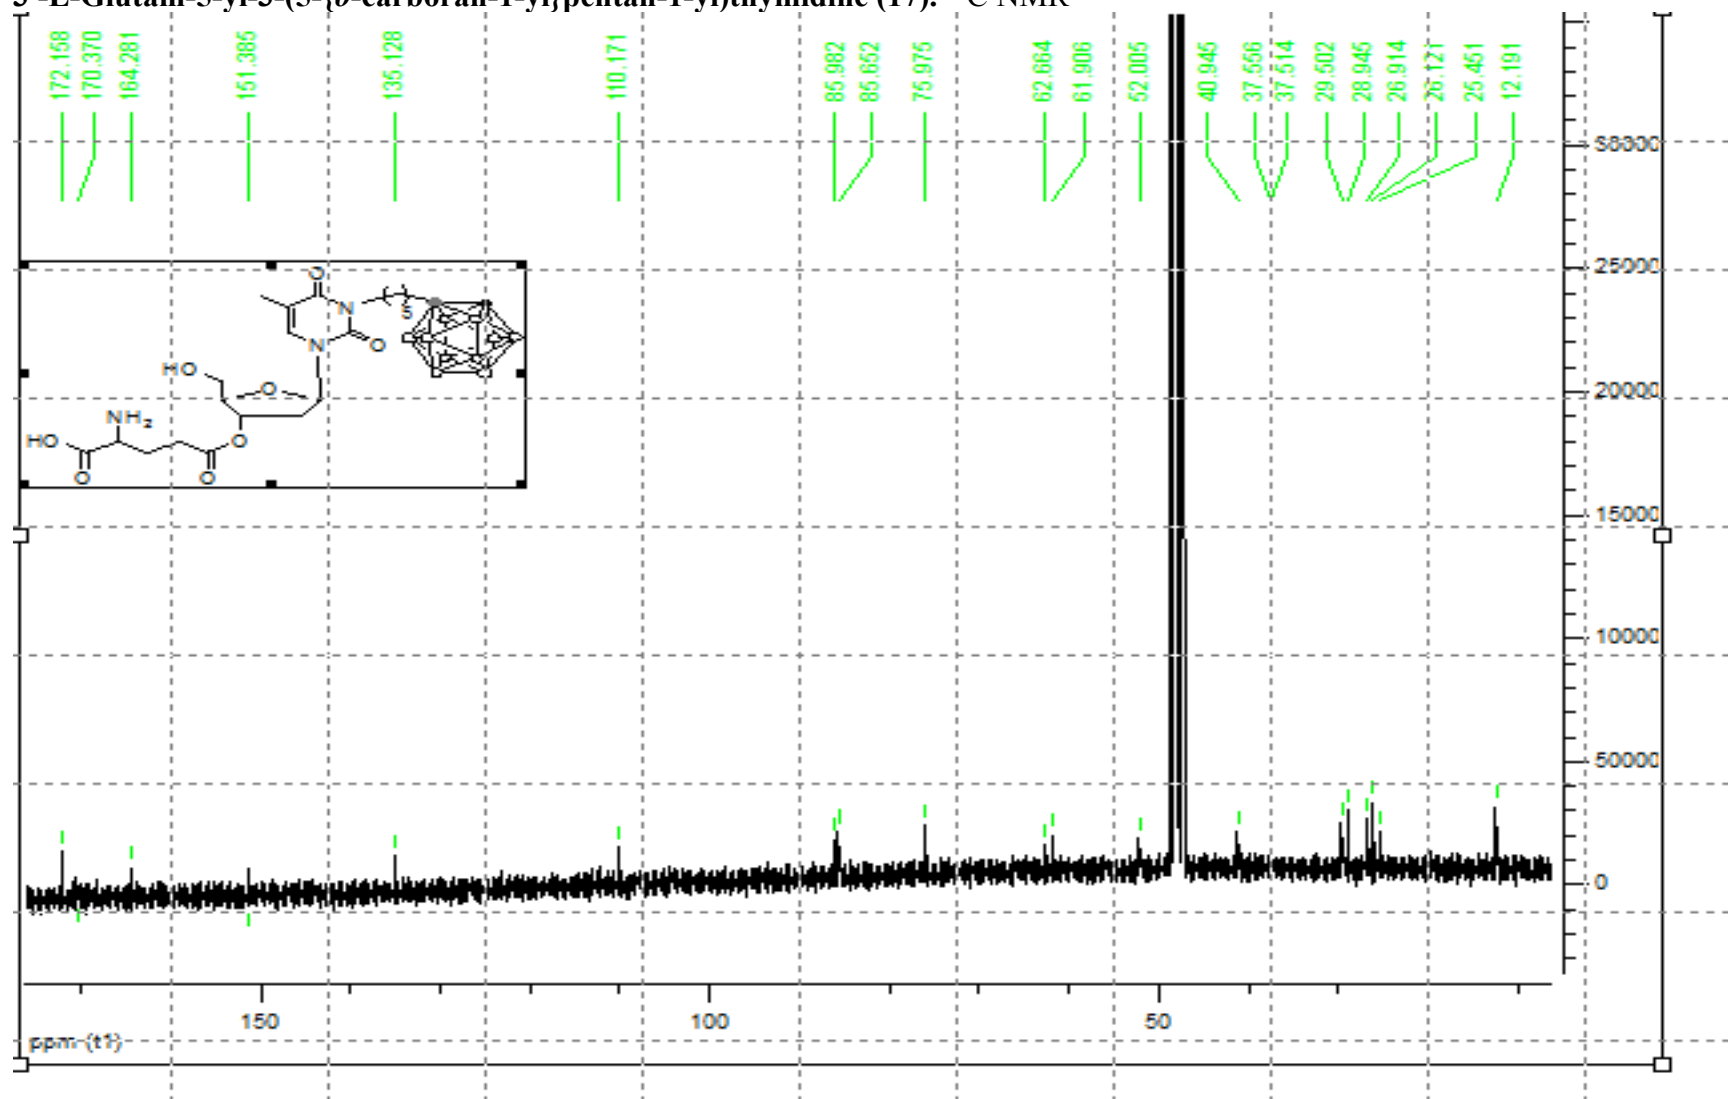

**3'-L-Glutam-5-yl-3-(5-{*o*-carboran-1-yl}pentan-1-yl)thymidine (17).** HR-ESI-MS: found: m/z 606.3813.

TOF MS ES+  
2.31e5

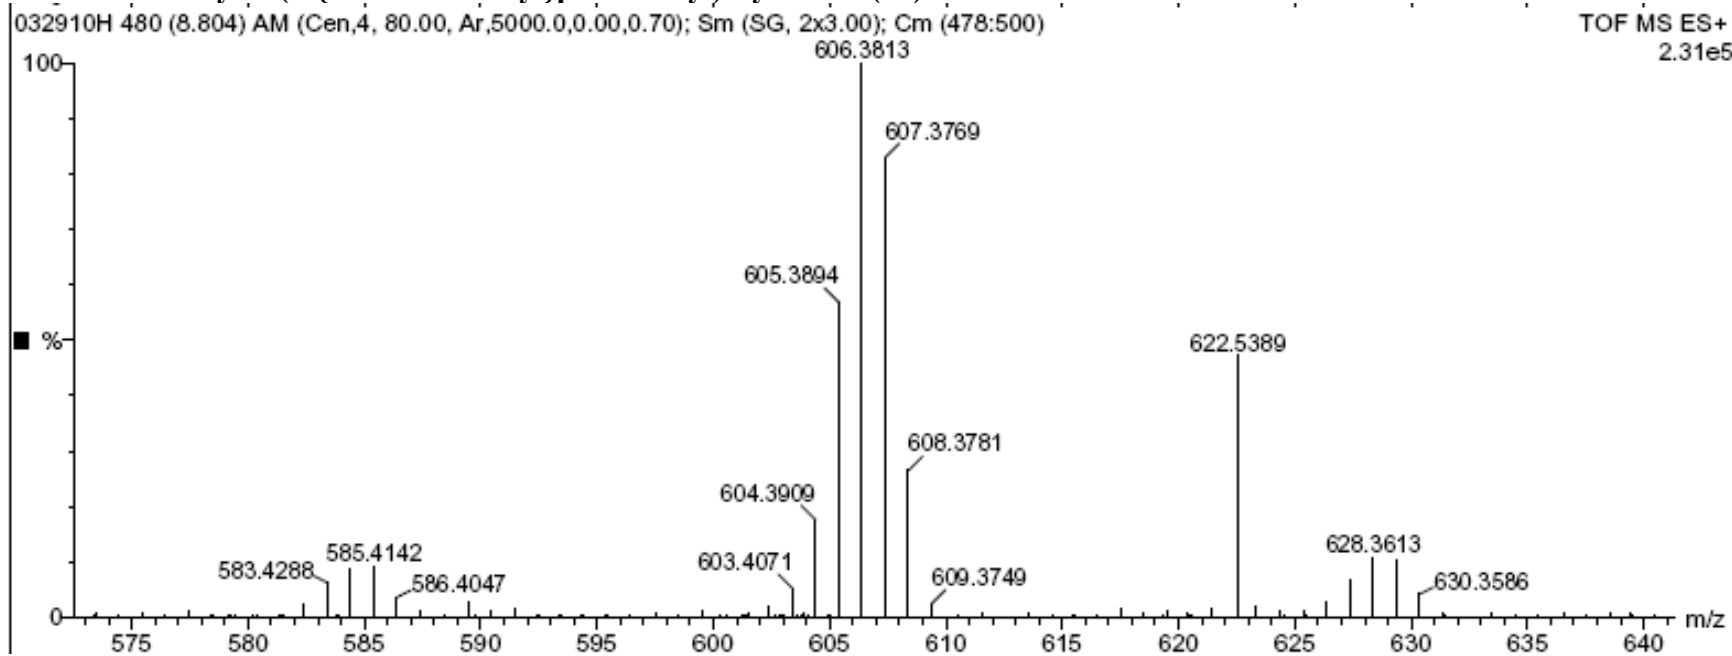

**3'-L-Glutam-5-yl-3-(5-{*o*-carboran-1-yl}pentan-1-yl)thymidine (17).** HPLC chromatogram (method A3, Table 3 in manuscript), retention time: 13.99 min.

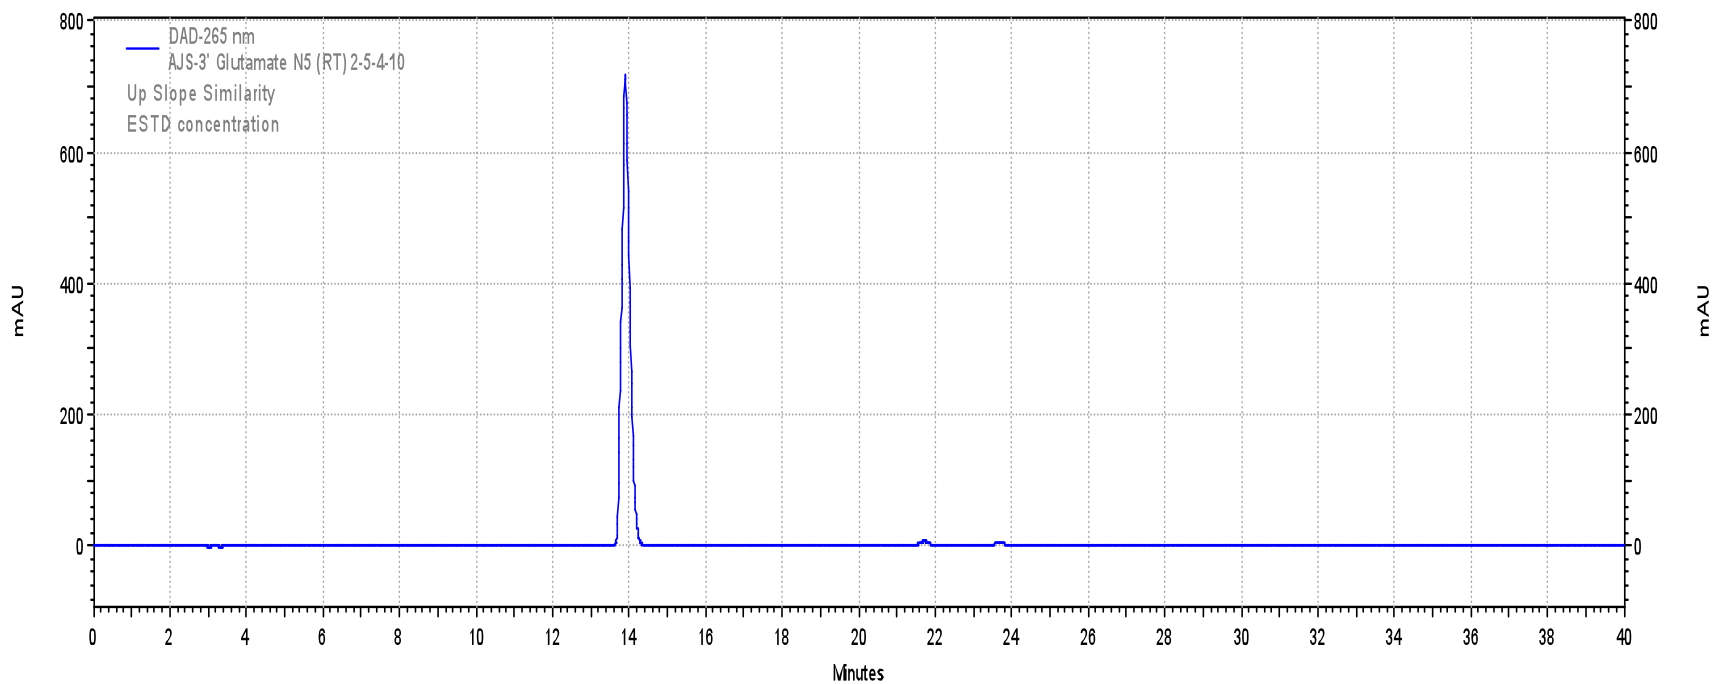



**3'-L-Glutam-5-yl-3-(5-{*o*-carboran-1-yl}pentan-1-yl)thymidine (17)** . HPLC chromatogram (method B3, Table 3 in manuscript), retention time: 32.05 min.

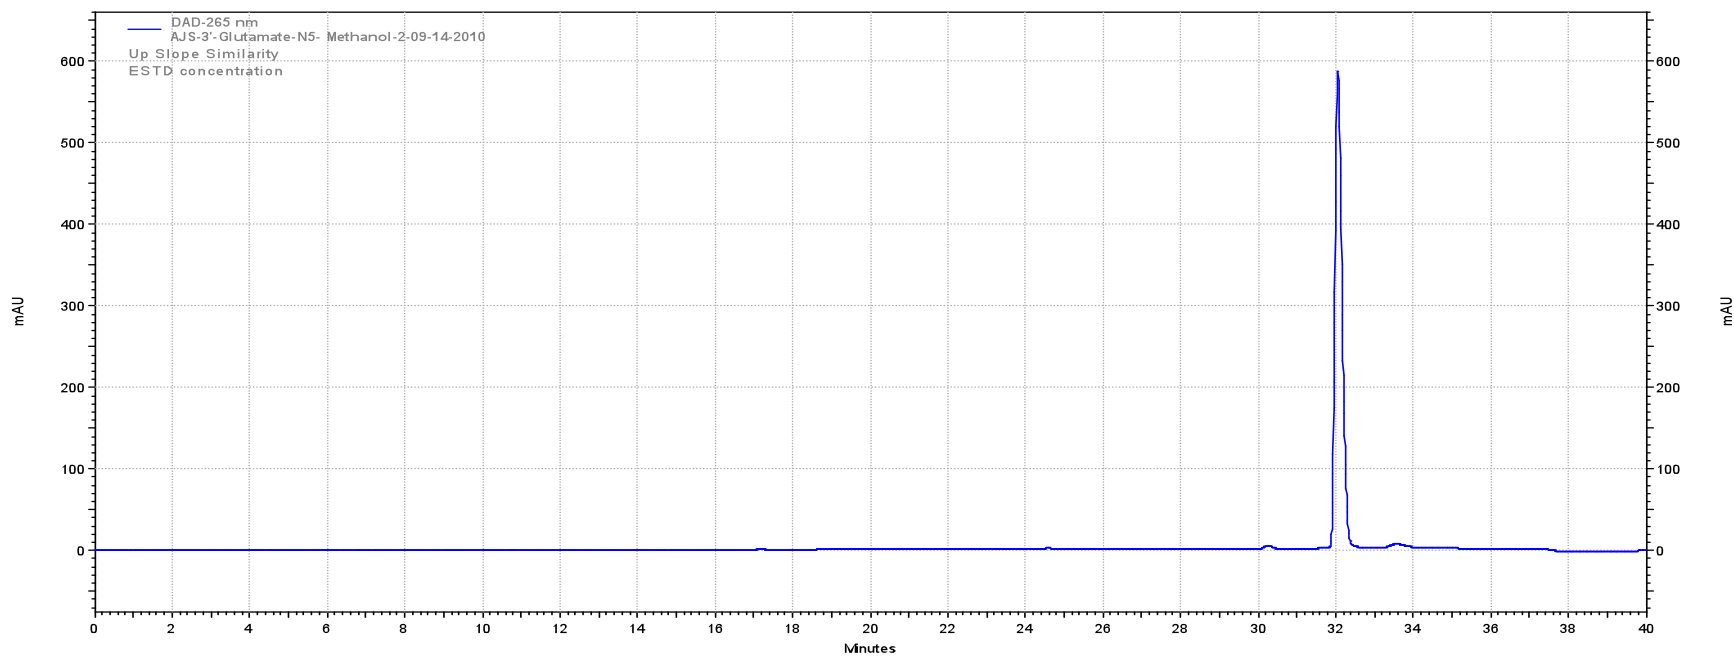

5'-L-Glutam-5-yl-3-(5-{*o*-carboran-1-yl}pentan-1-yl)thymidine (18). <sup>1</sup>H NMR

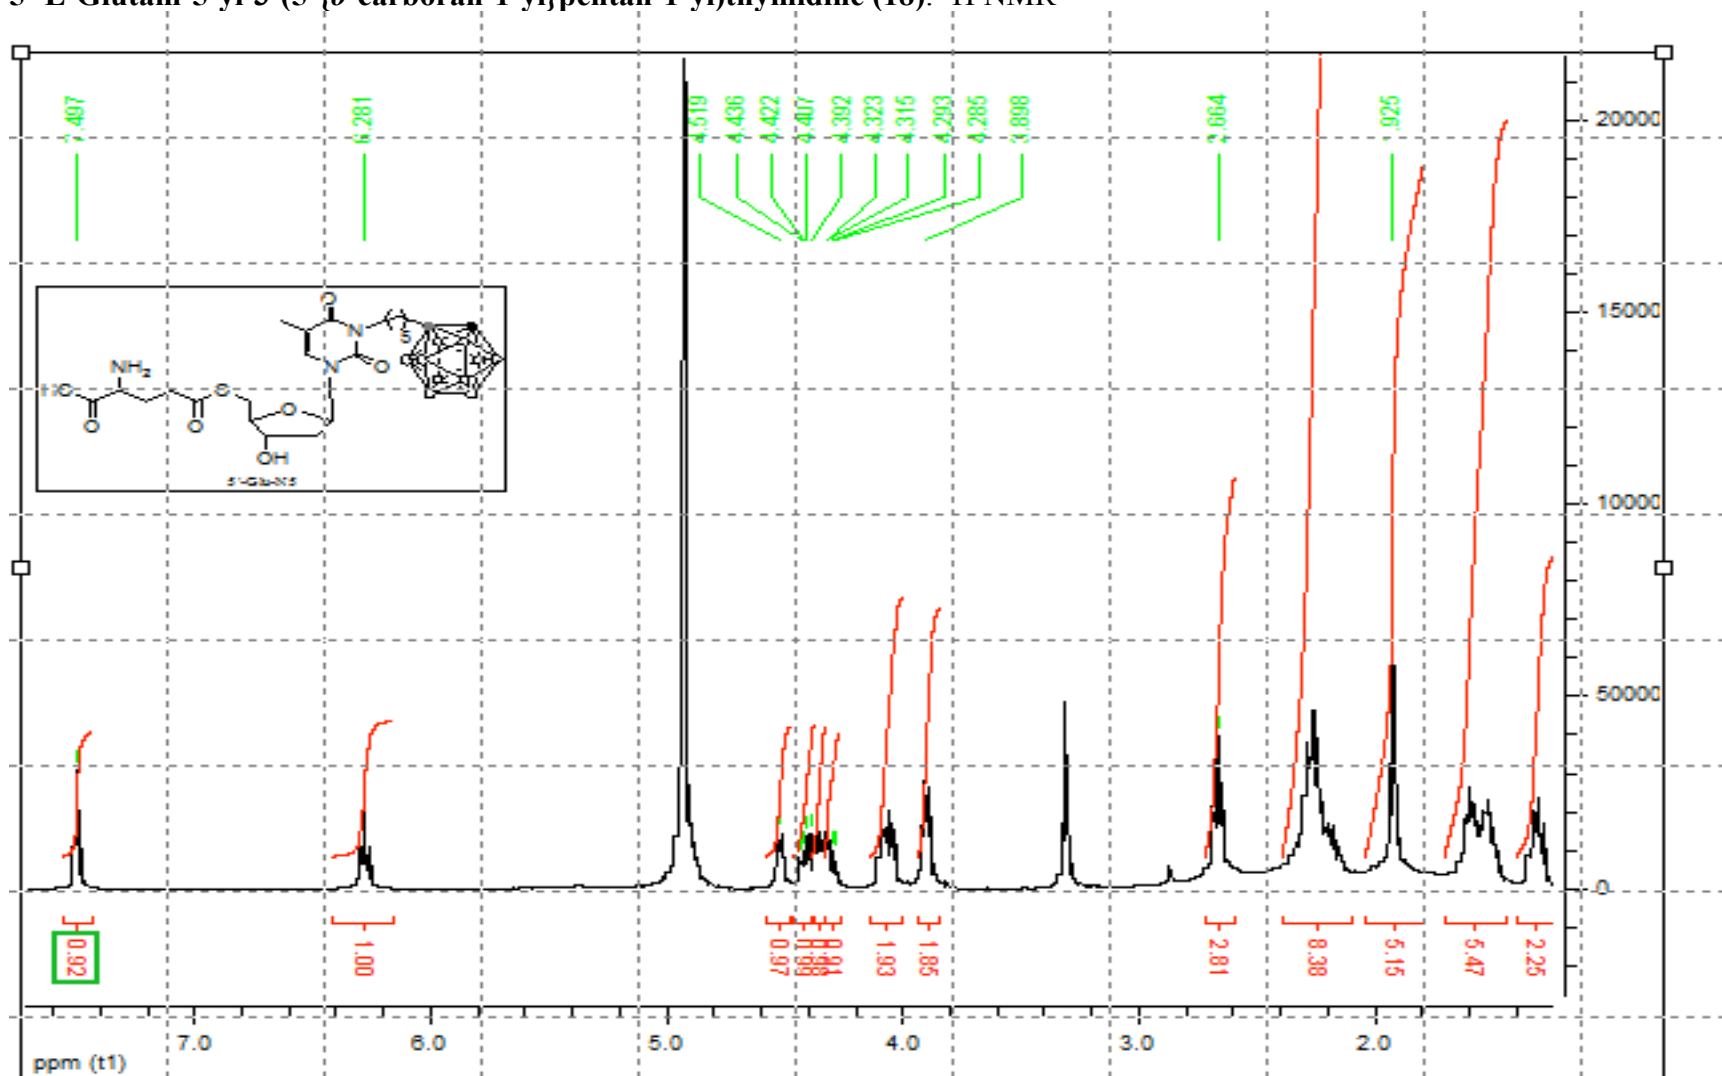

5'-L-Glutam-5-yl-3-(5-{*o*-carboran-1-yl}pentan-1-yl)thymidine (18). <sup>13</sup>C NMR

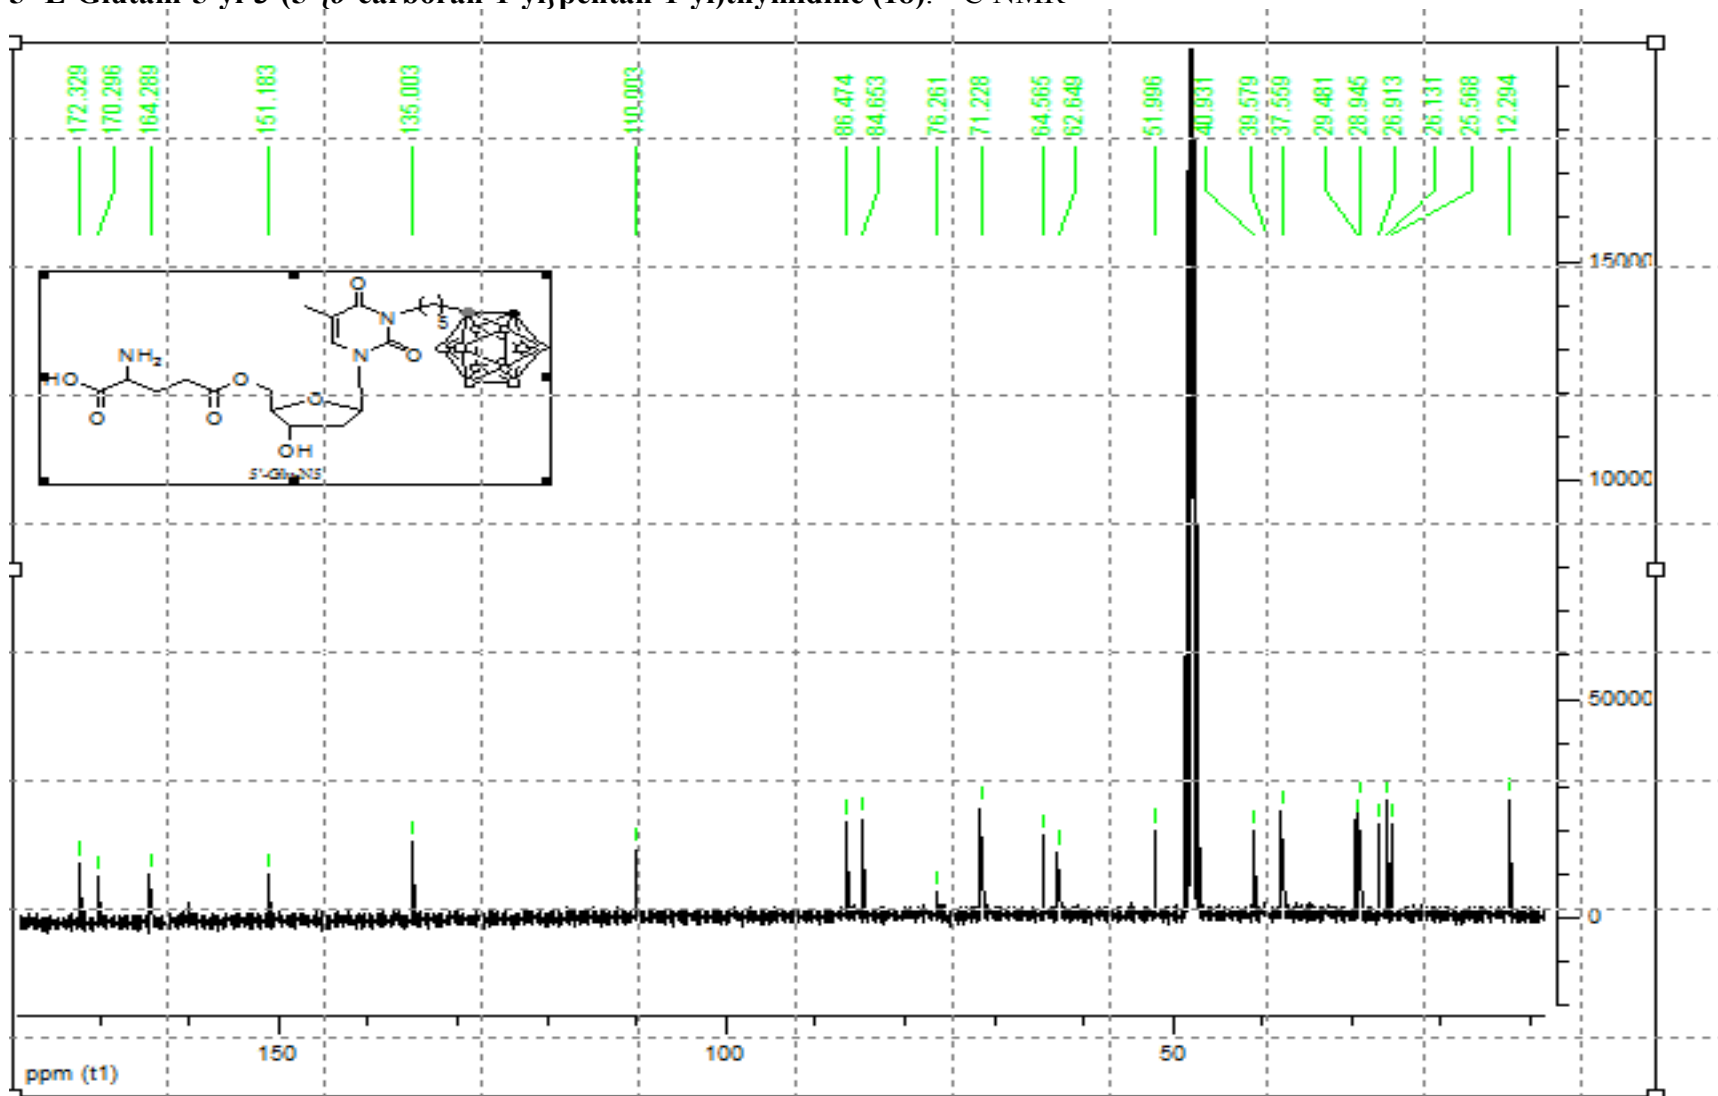

5'-L-Glutam-5-yl-3-(5-{*o*-carboran-1-yl}pentan-1-yl)thymidine (18). HR-ESI-MS: found: m/z 606.3793.

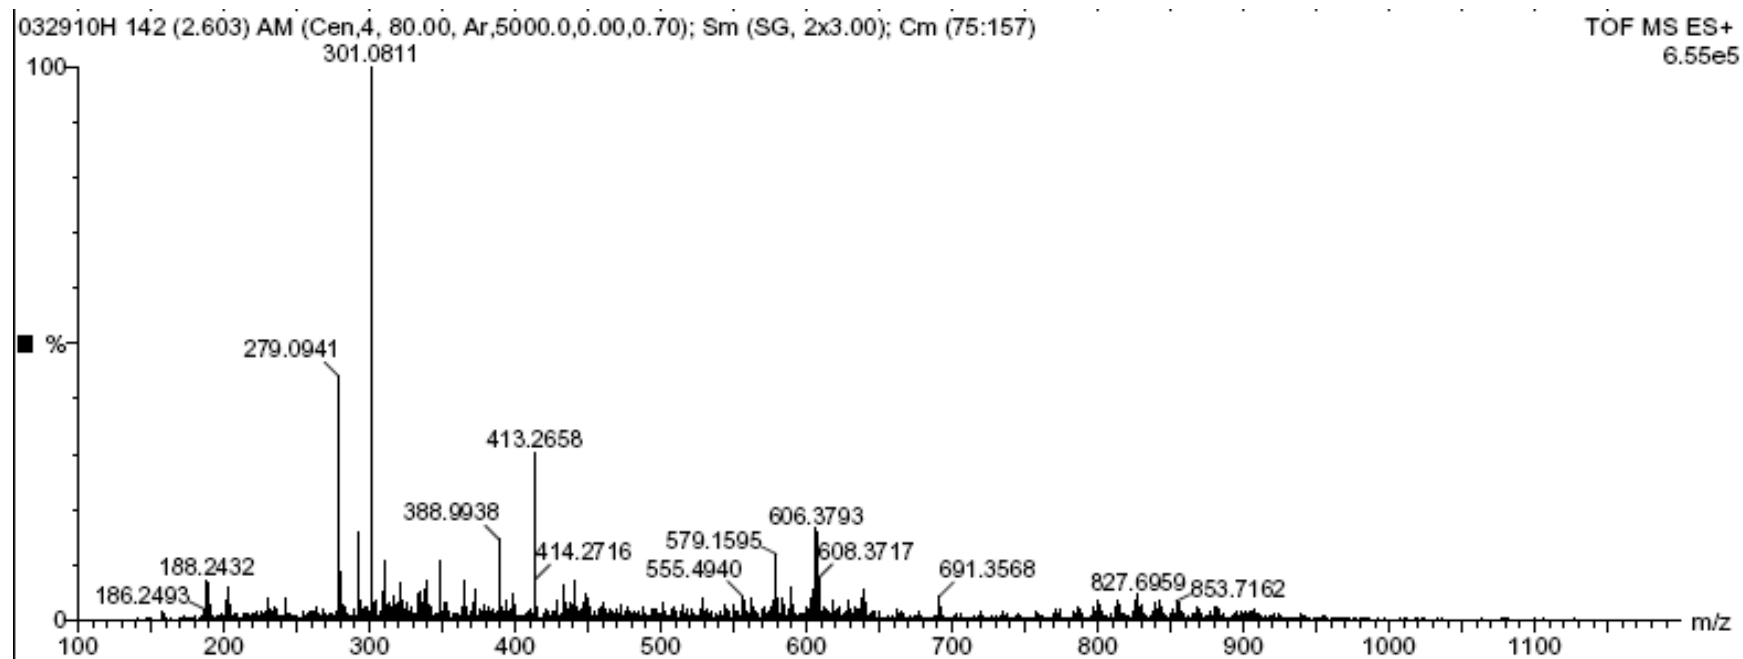

032910H 142 (2.603) AM (Cen,4, 80.00, Ar,5000.0,0.00,0.70); Sm (SG, 2x3.00); Cm (75:157)

TOF MS ES+  
1.08e5

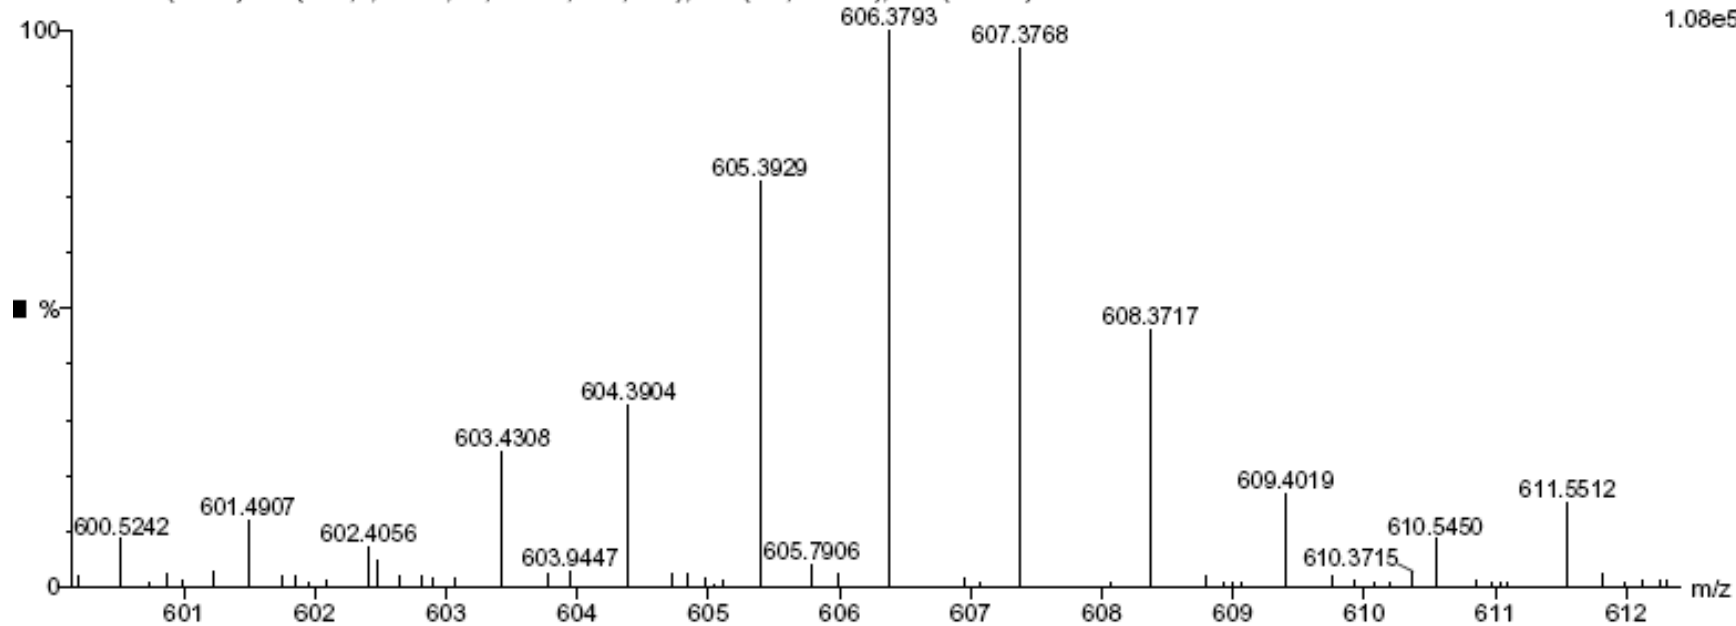

**5'-L-Glutam-5-yl-3-(5-{*o*-carboran-1-yl}pentan-1-yl)thymidine (18).** HPLC chromatogram (method A3, Table 3 in manuscript), retention time: 13.69 min.

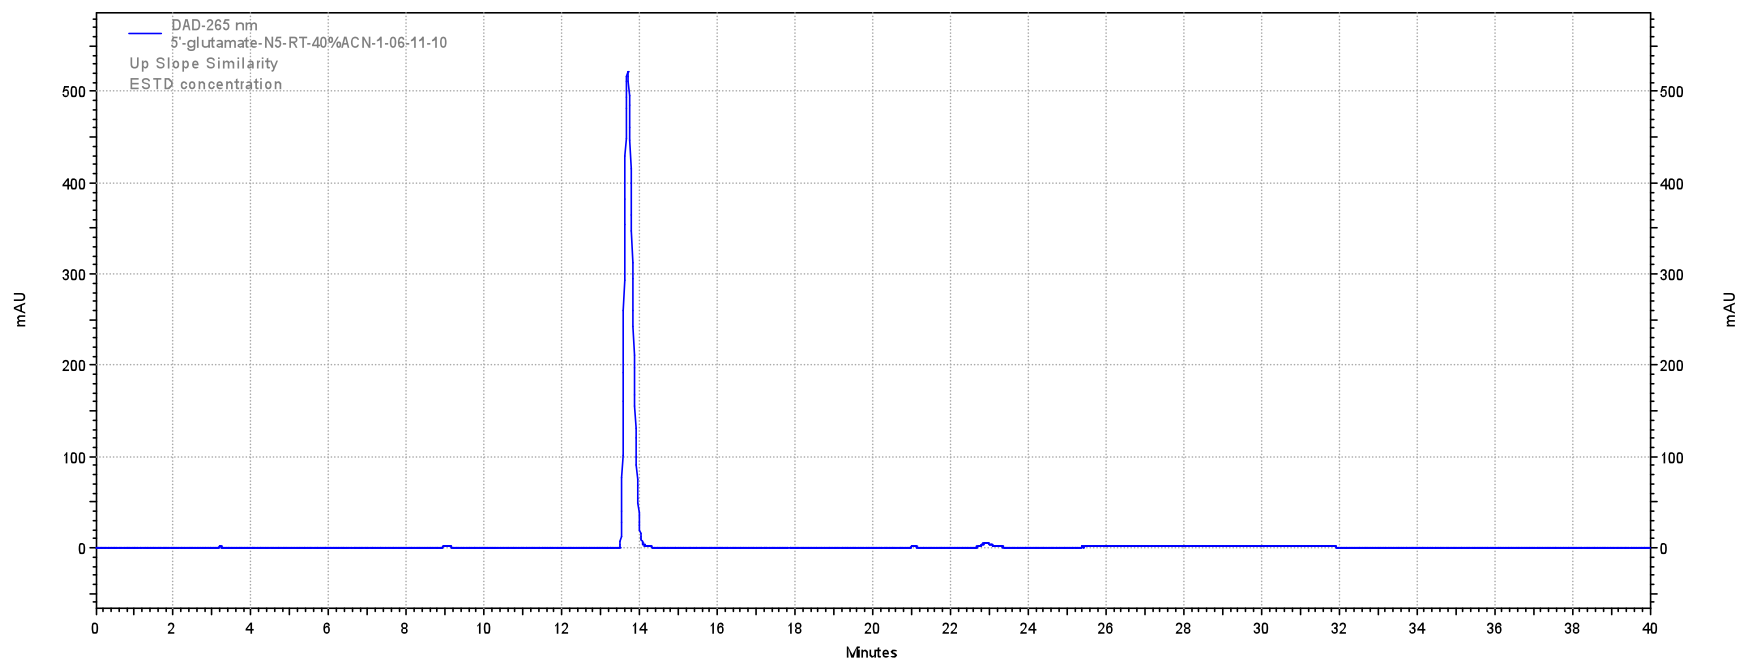

**5'-L-Glutam-5-yl-3-(5-{*o*-carboran-1-yl}pentan-1-yl)thymidine (18)** . HPLC chromatogram (method B3, Table 3 in manuscript), retention time: 31.64 min.

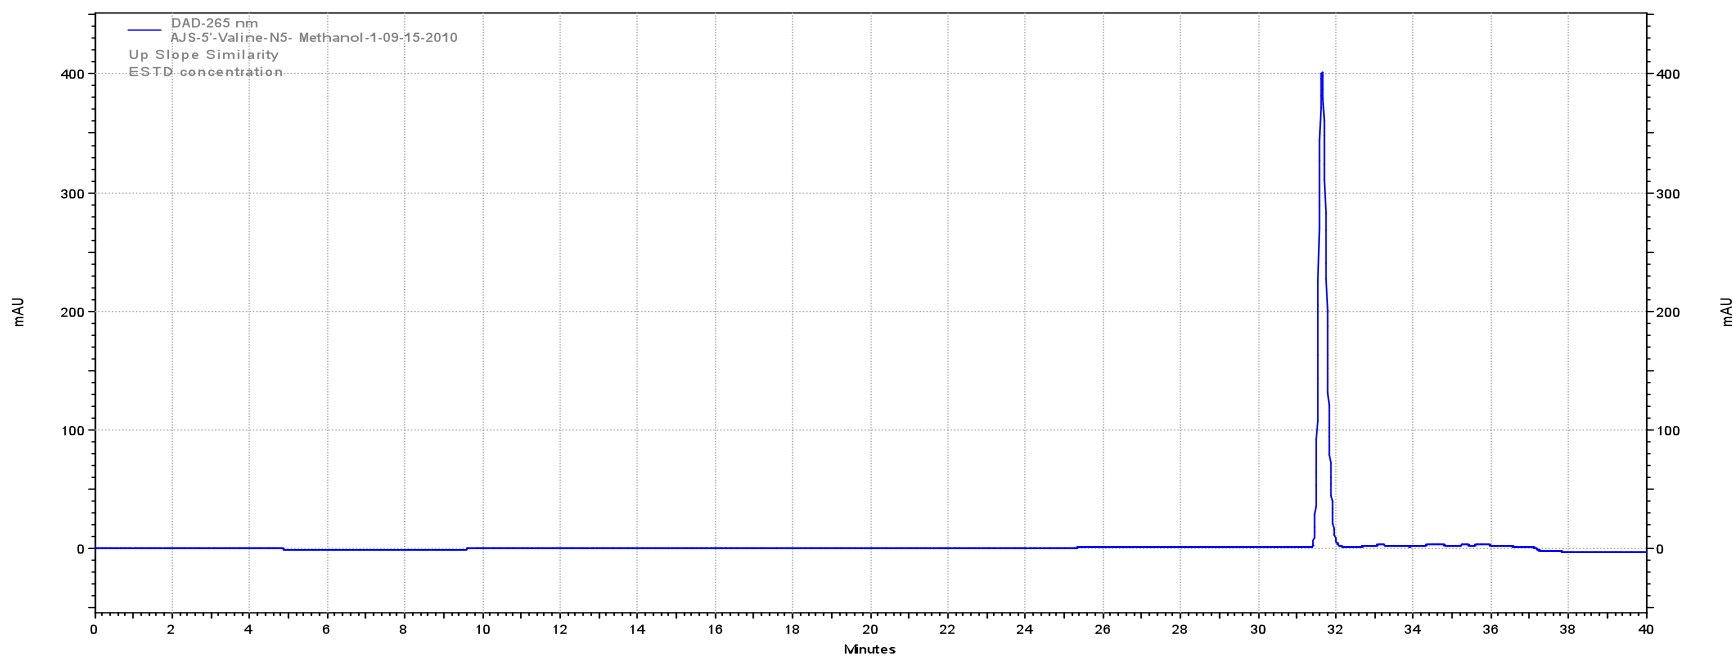

3',5'-Di-L-glutam-5-yl-3-(5-{*o*-carboran-1-yl}pentan-1-yl)thymidine (19). <sup>1</sup>H NMR

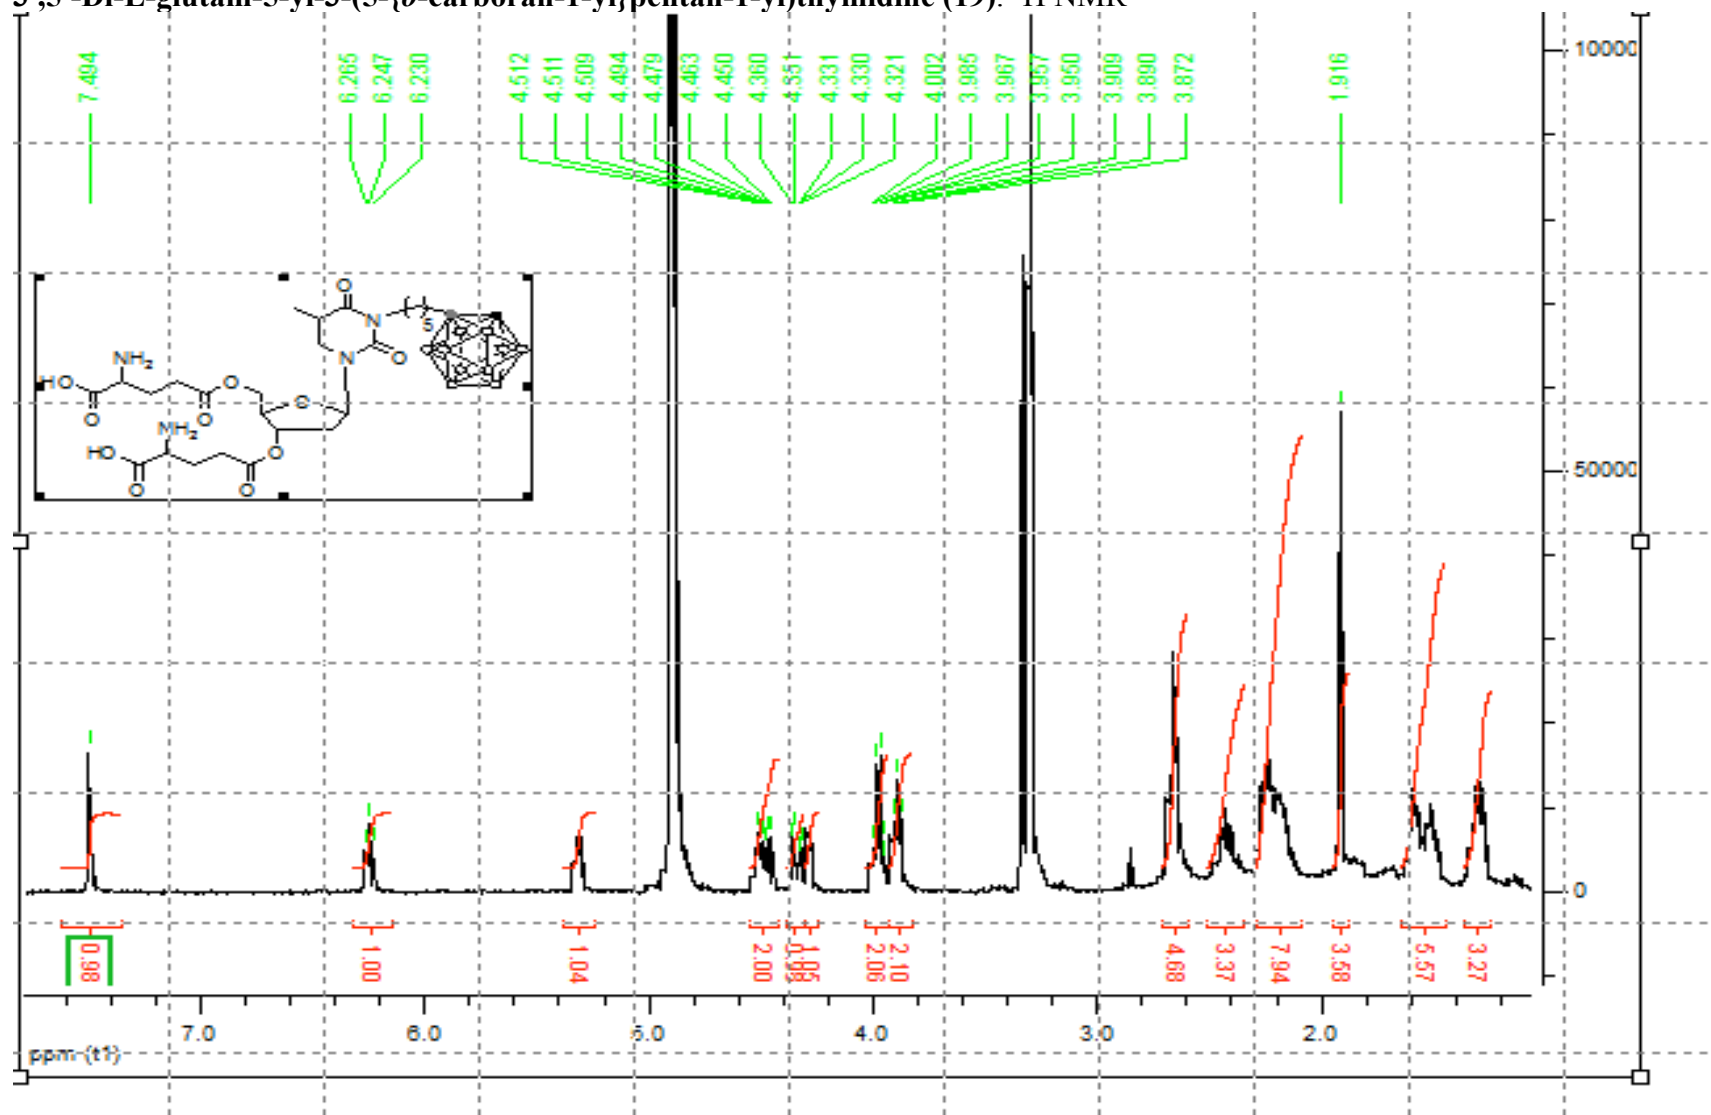



3',5'-Di-L-glutam-5-yl-3-(5-{*o*-carboran-1-yl}pentan-1-yl)thymidine (19). <sup>13</sup>C NMR

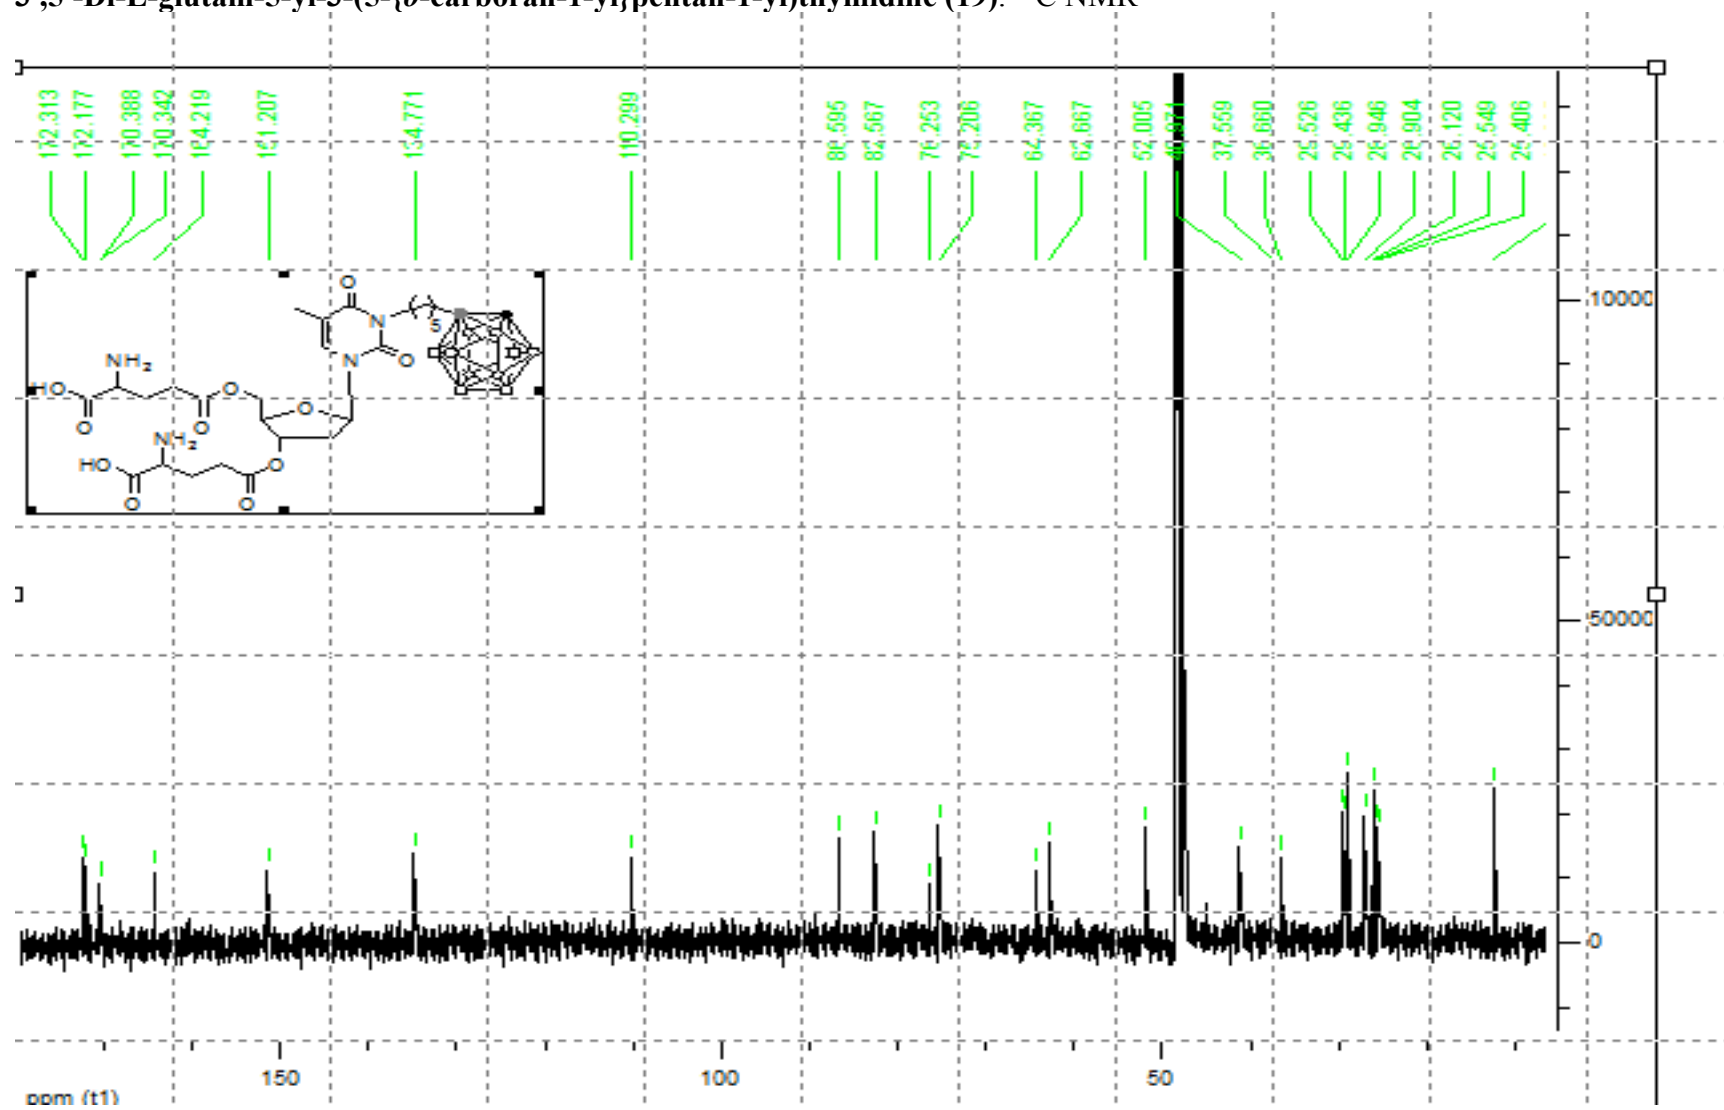

**3',5'-Di-L-glutam-5-yl-3-(5-{*o*-carboran-1-yl}pentan-1-yl)thymidine (19).** HR-ESI-MS: found: m/z 735.4203.

TOF MS ES+  
2.86e5

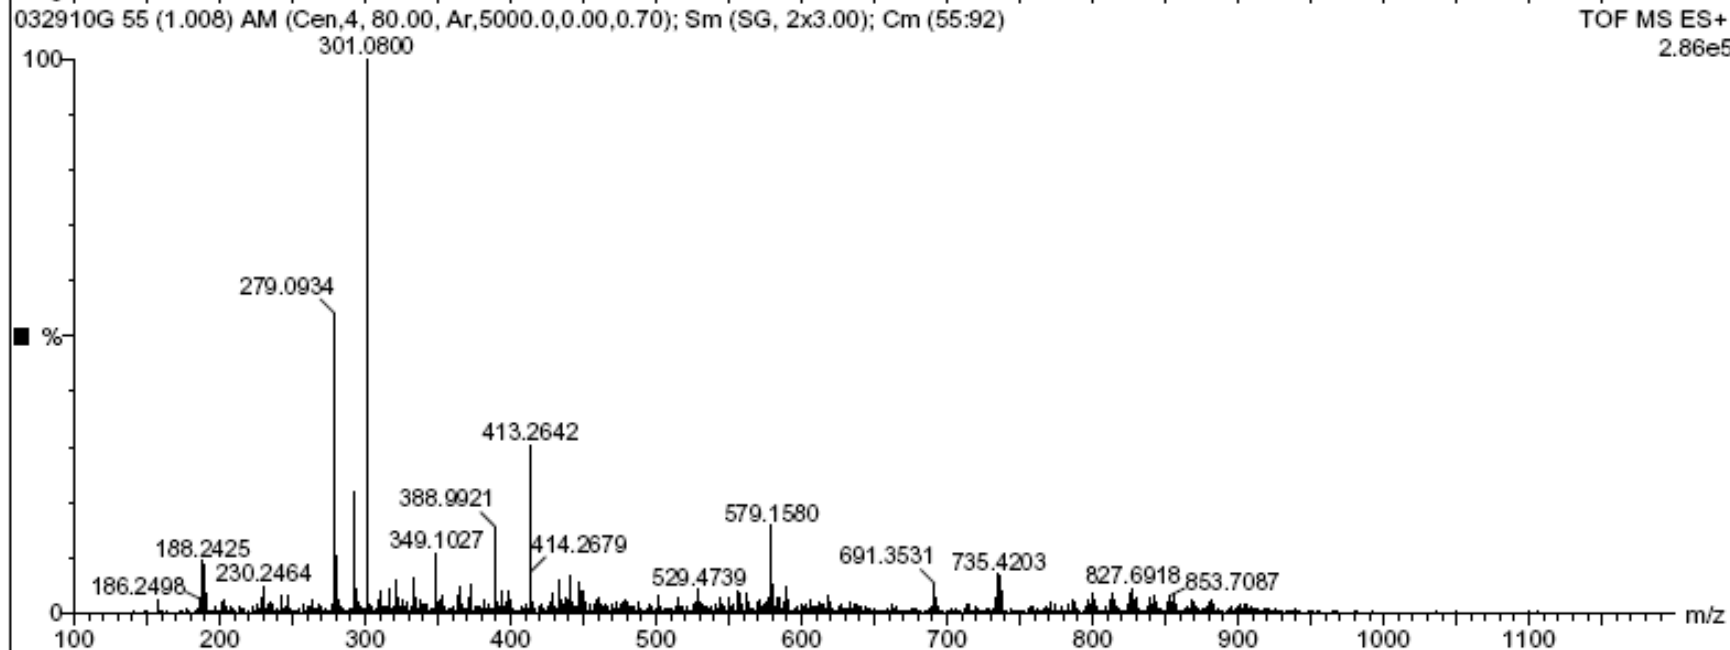

032910G 55 (1.008) AM (Cen,4, 80.00, Ar,5000.0,0.00,0.70); Sm (SG, 2x3.00); Cm (55:92)

TOF MS ES+  
2.00e4

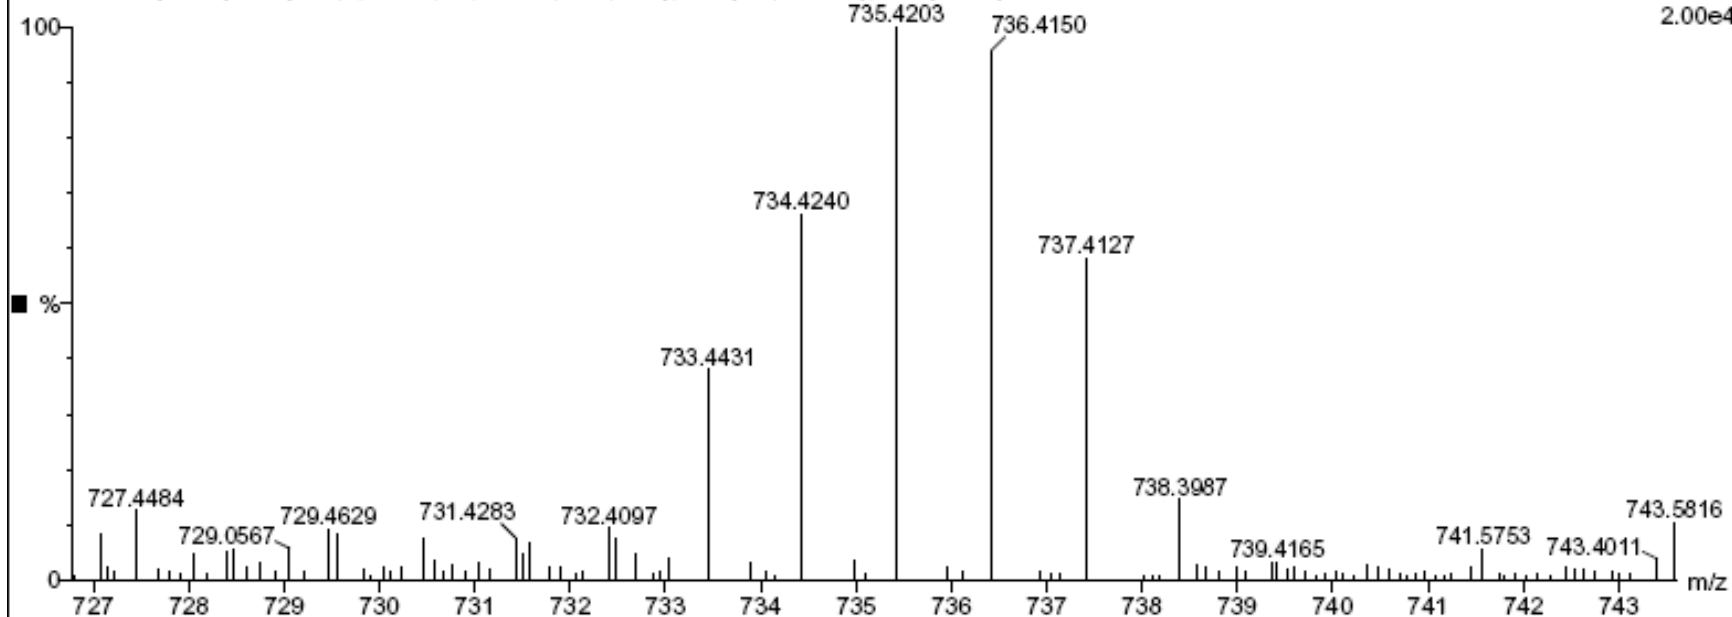

**3',5'-Di-L-glutam-5-yl-3-(5-{*o*-carboran-1-yl}pentan-1-yl)thymidine (19).** HPLC chromatogram (method A3, Table 3 in manuscript), retention time: 8.92 min.

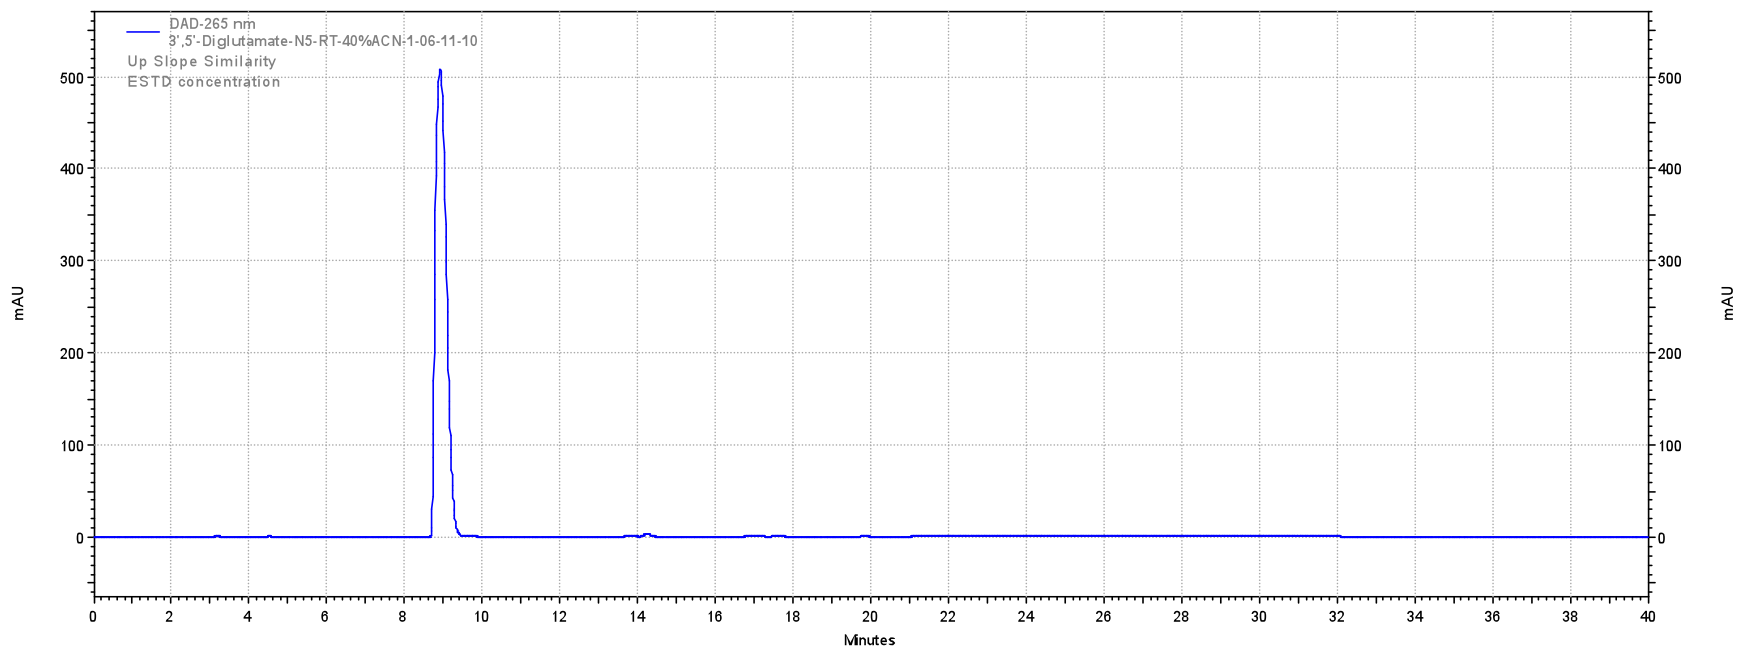

**3',5'-Di-L-glutam-5-yl-3-(5-{*o*-carboran-1-yl}pentan-1-yl)thymidine (19).** HPLC chromatogram (method B3, Table 3 in manuscript), retention time: 26.50 min.

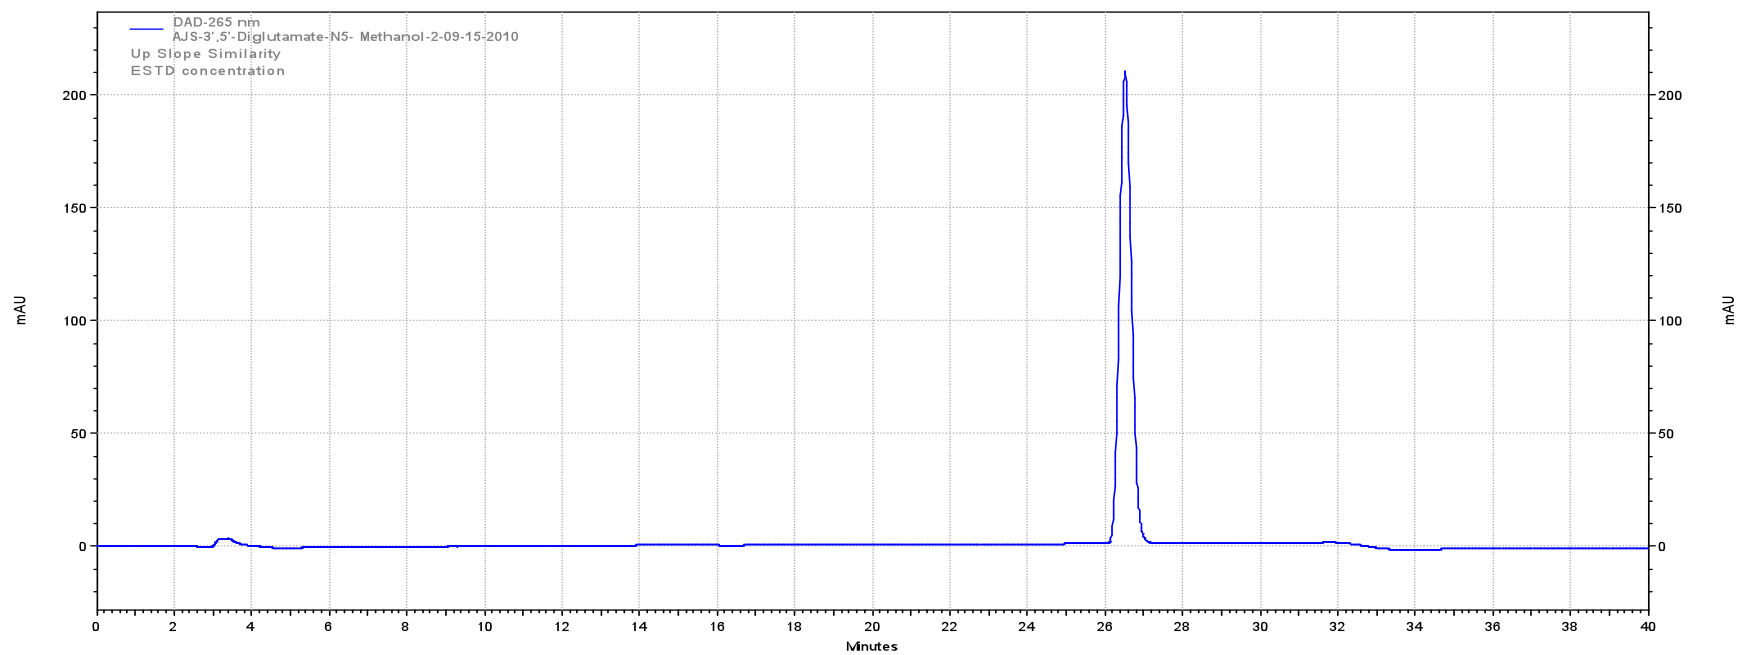

3'-Glycyl-3-[5-(2-{2,3-dihydroxyprop-1-yl}-*o*-carboran-1-yl)-pentan-1-yl]thymidine (20). <sup>1</sup>H NMR

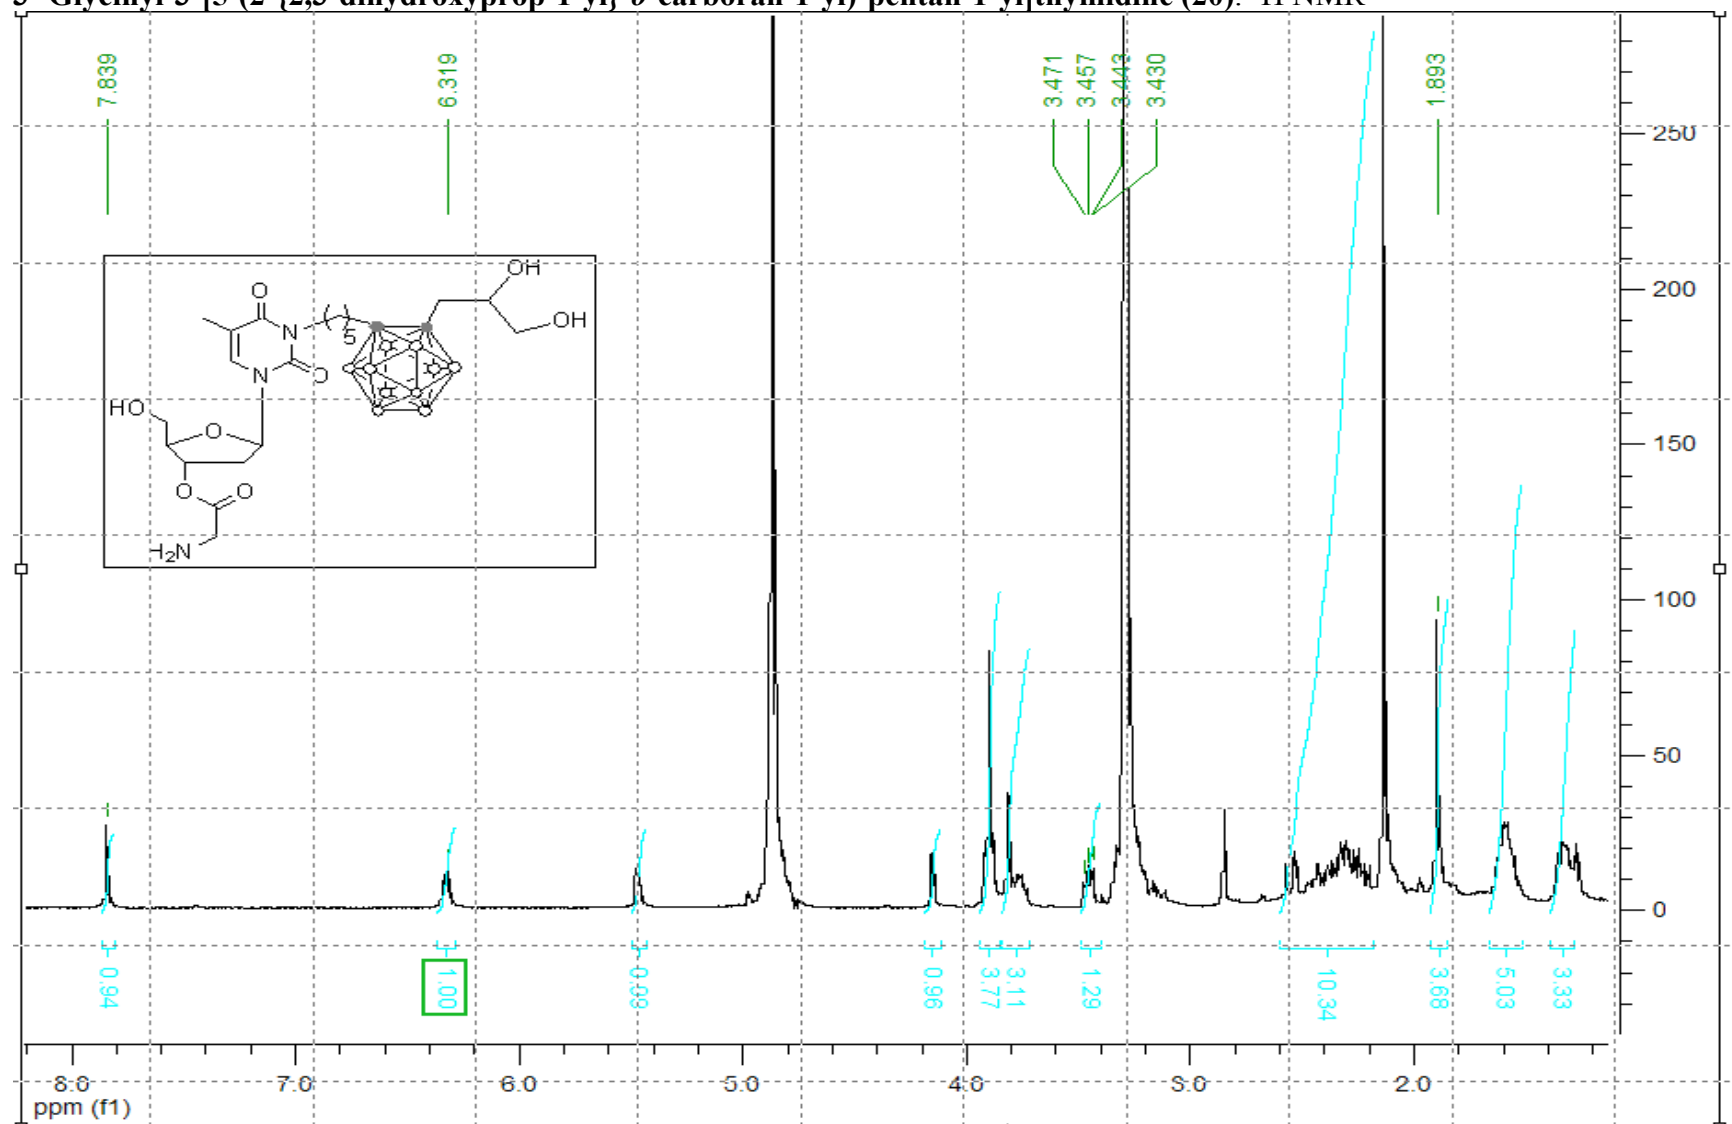

3'-Glycyl-3-[5-(2-{2,3-dihydroxyprop-1-yl}-*o*-carboran-1-yl)-pentan-1-yl]thymidine (20).  $^{13}\text{C}$  NMR

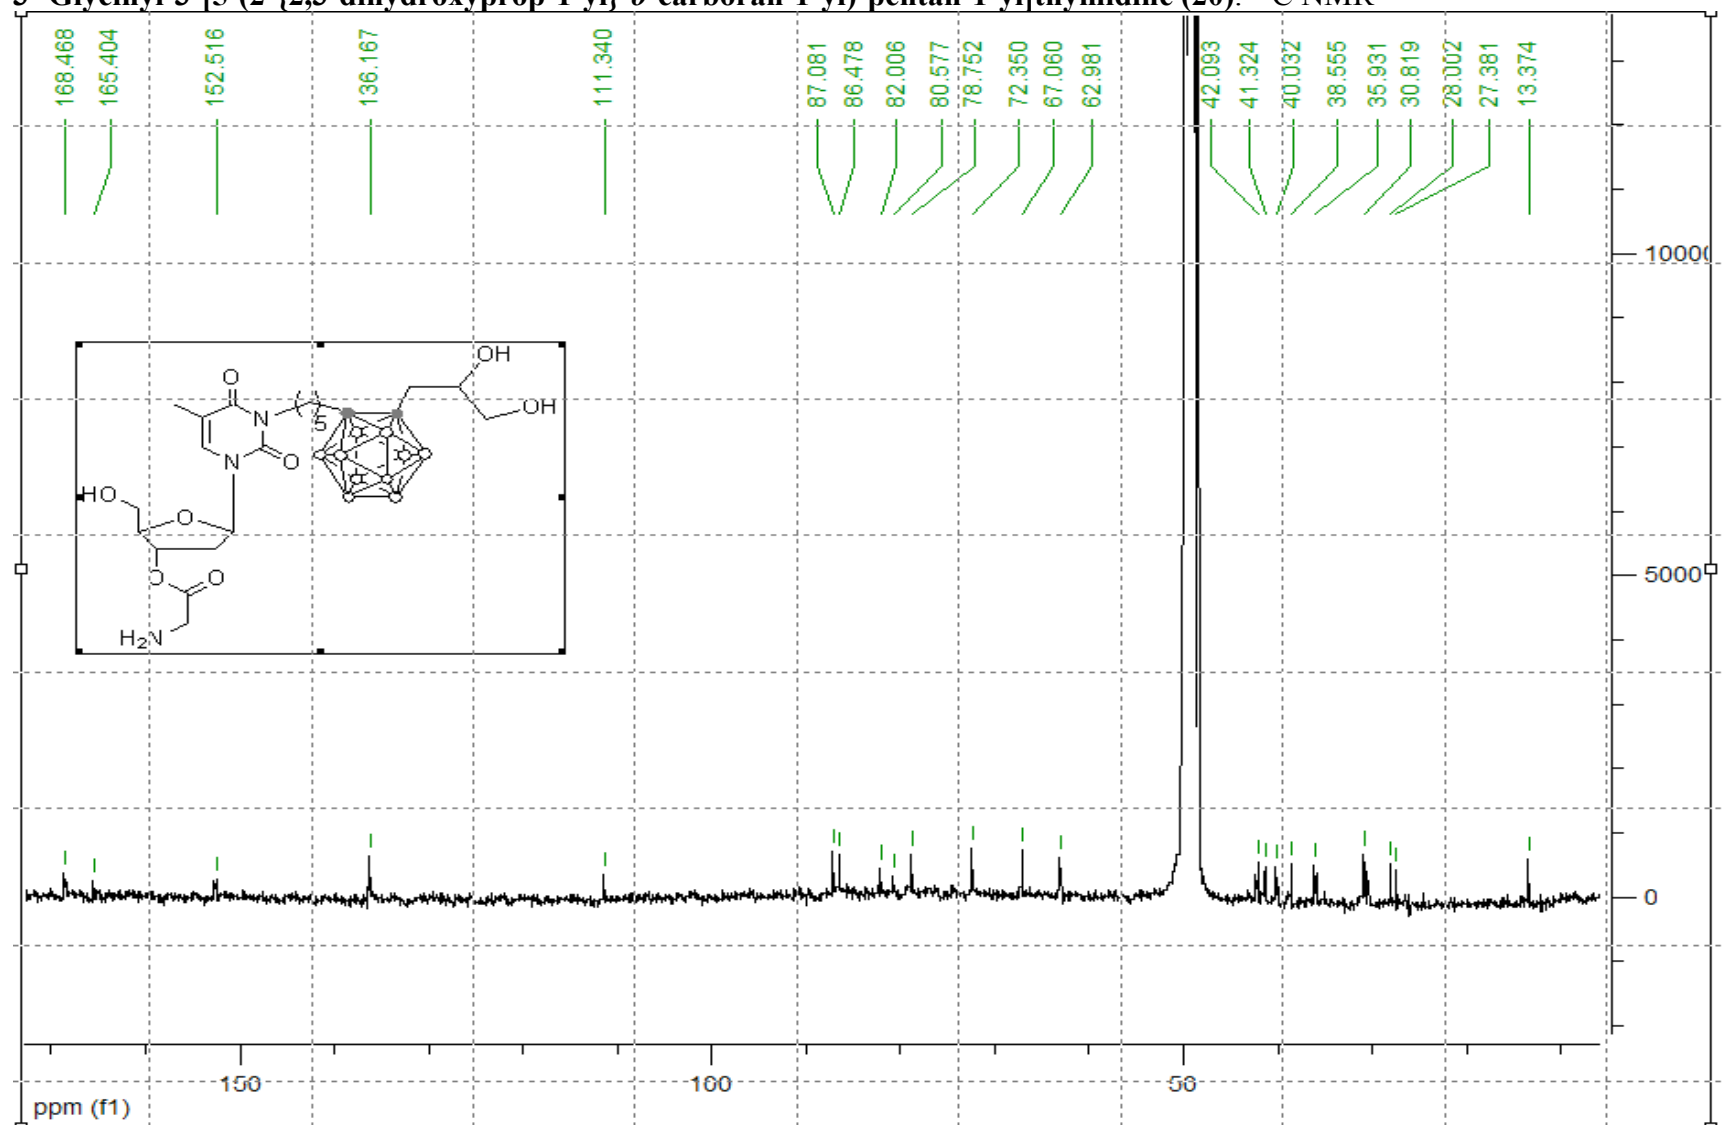

**3'-Glycyl-3-[5-(2-{2,3-dihydroxyprop-1-yl}-*o*-carboran-1-yl)-pentan-1-yl] thymidine (20).** HR-ESI-MS: found:  $m/z$  586.4059.

L111910C 1294 (45.314) AM (Cen,4, 80.00, Ar,5000.0,0.00,0.70); Sm (SG, 2x3.00); Cm (1239:1305)

TOF MS ES+  
2.36e5

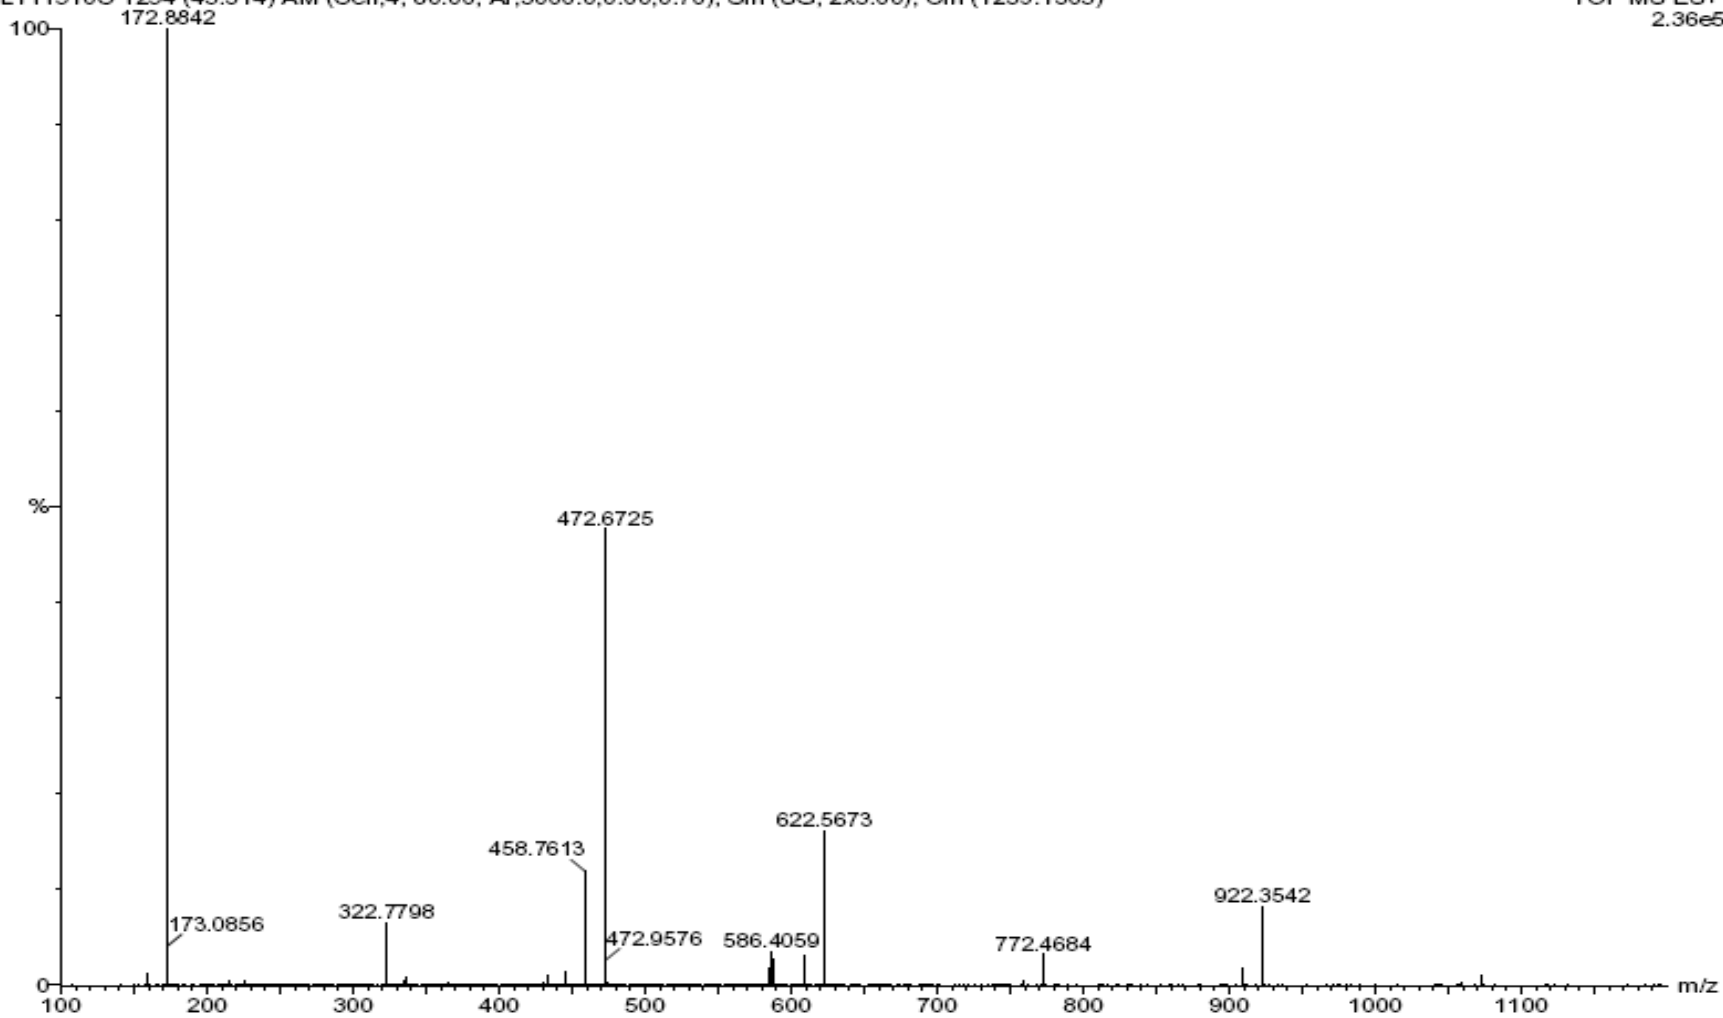



L111910C 1294 (45.314) AM (Cen,4, 80.00, Ar,5000.0,0.00,0.70); Sm (SG, 2x3.00); Cm (1239:1305)

TOF MS ES+  
8.18e3

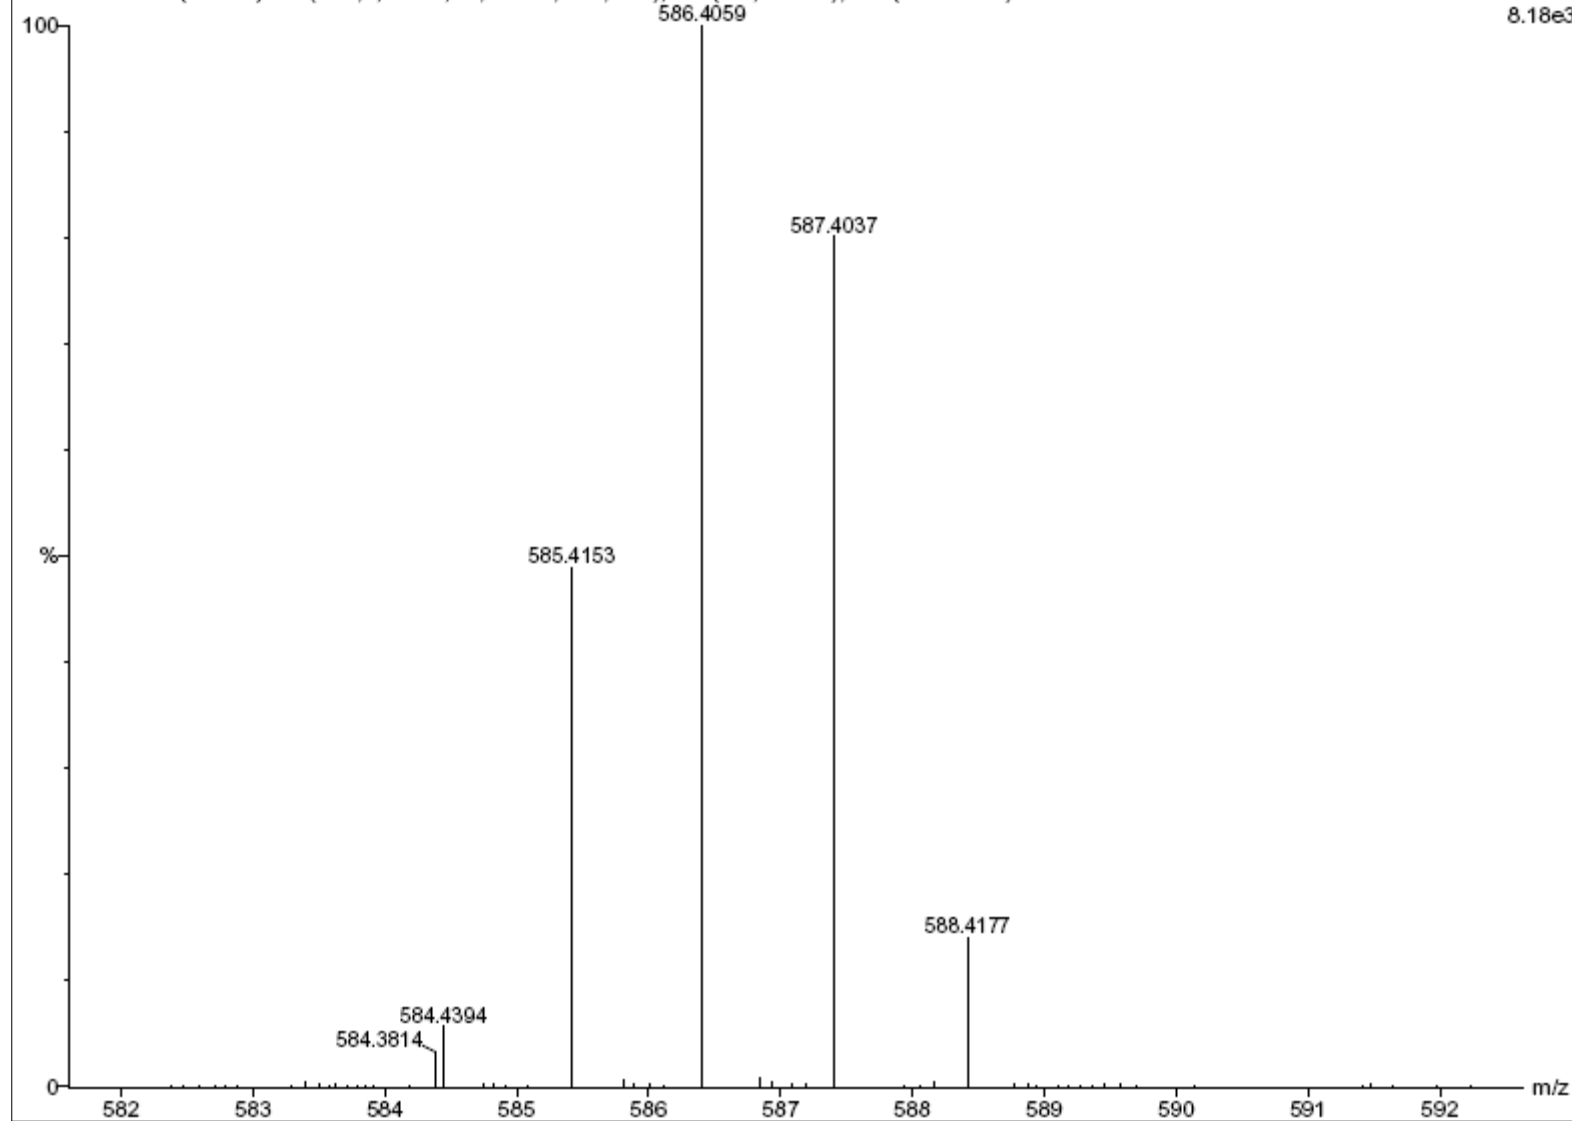

**3'-GlycinyI-3-[5-(2-{2,3-dihydroxyprop-1-yl}-*o*-carboran-1-yl)-pentan-1-yl]thymidine (20).** HPLC chromatogram (method A2, Table 3 in manuscript), retention time: 14.00 min.

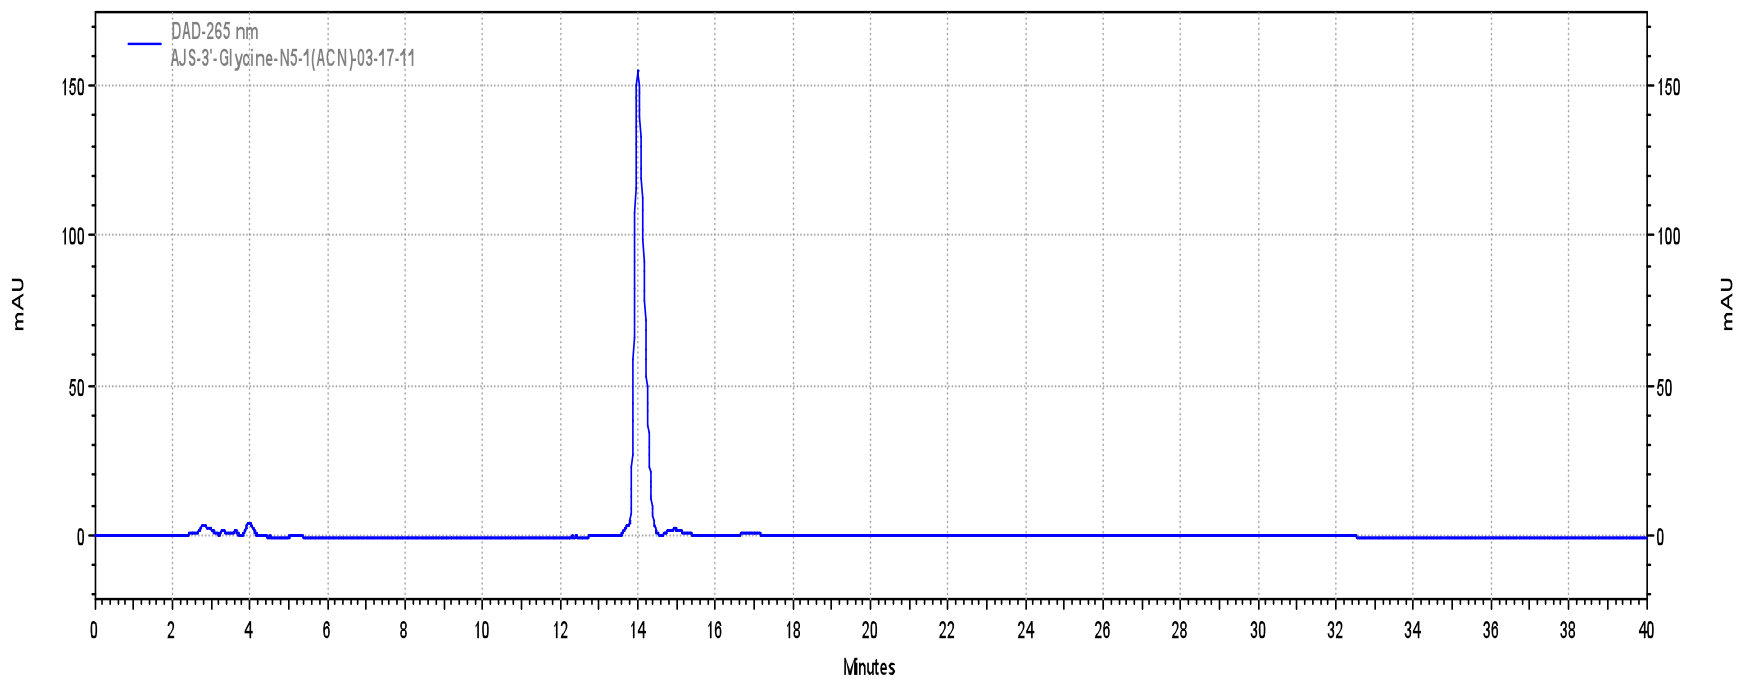

**3'-Glycyl-3-[5-(2-{2,3-dihydroxyprop-1-yl}-*o*-carboran-1-yl)-pentan-1-yl]thymidine (20)**. HPLC chromatogram (method B2, Table 3 in manuscript), retention time: 28.30 min.

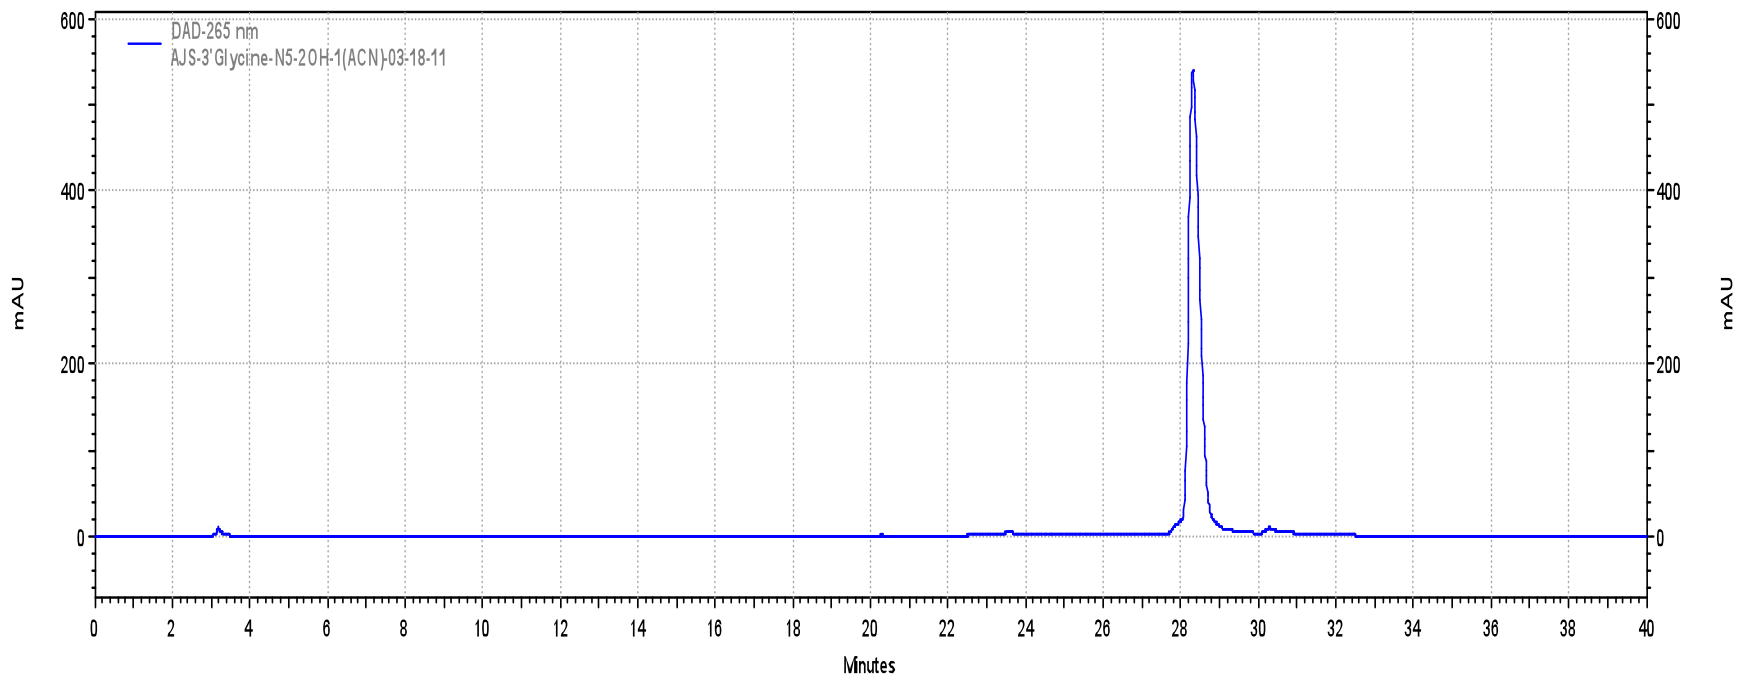

5'-Glycyl-3-[5-(2-{2,3-dihydroxyprop-1-yl}-*o*-carboran-1-yl)-pentan-1-yl]thymidine (21). <sup>1</sup>H NMR

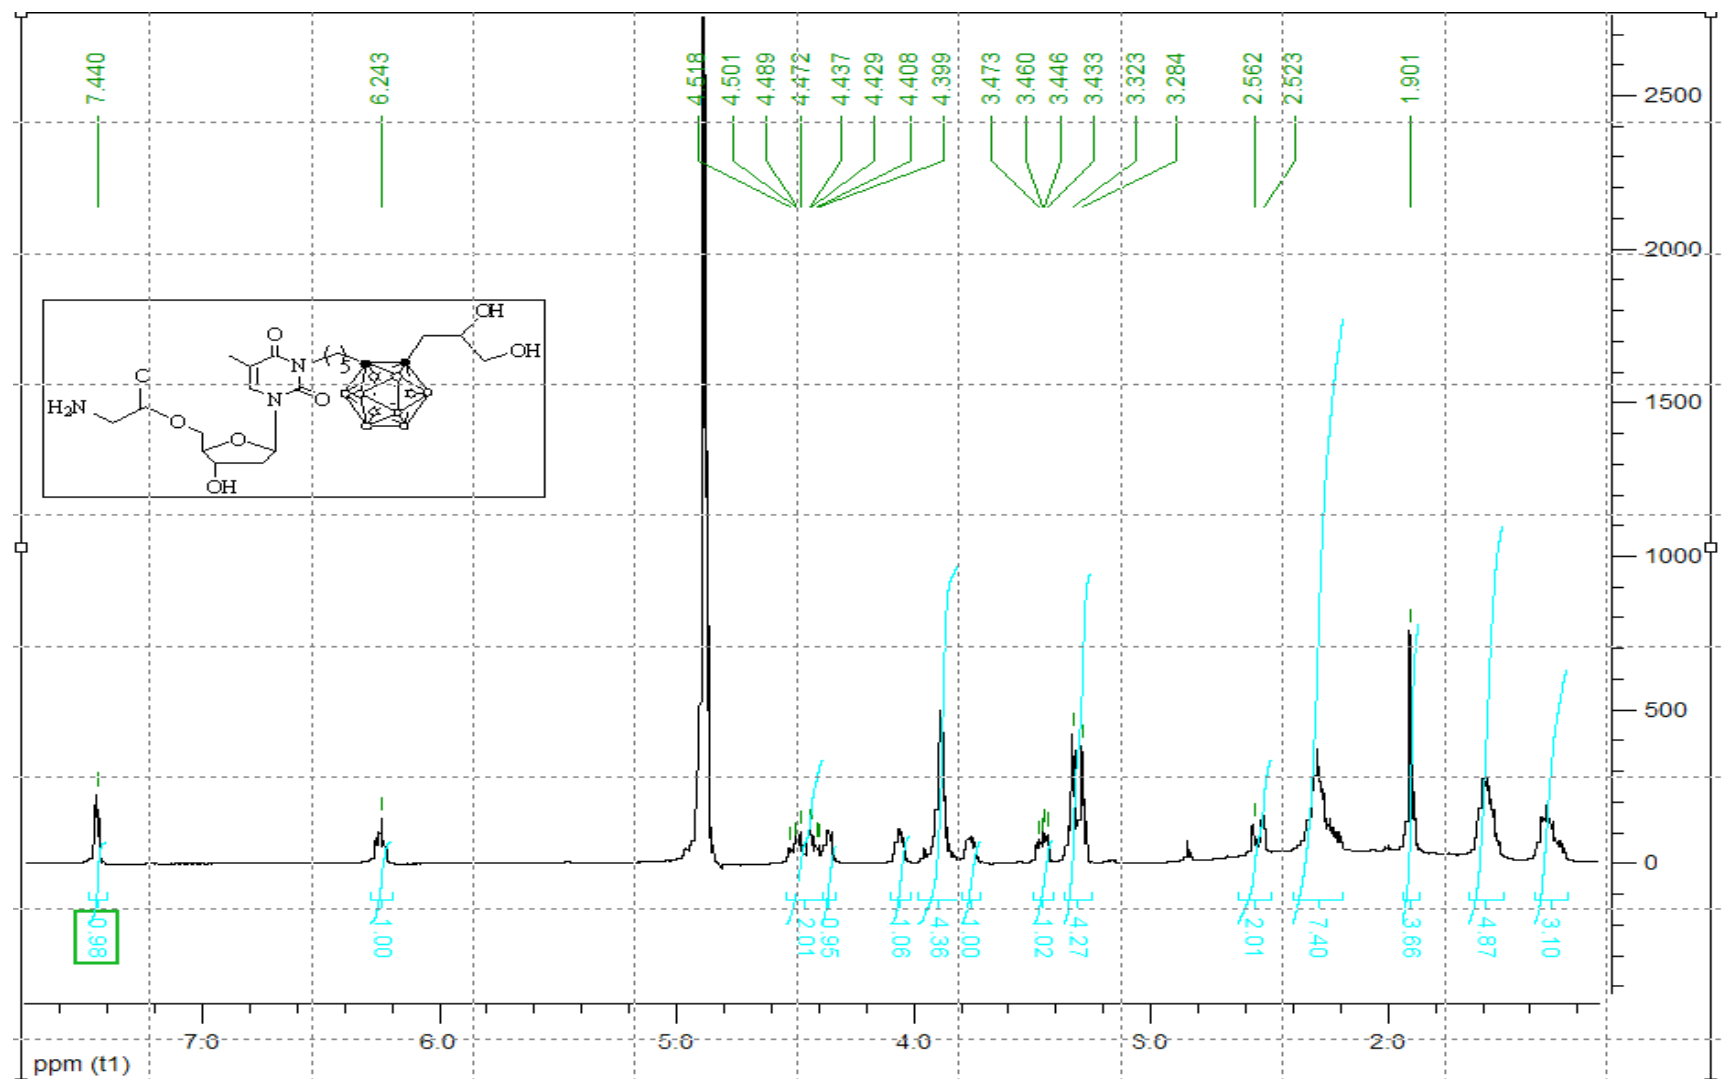

5'-Glycyl-3-[5-(2-{2,3-dihydroxyprop-1-yl}-*o*-carboran-1-yl)-pentan-1-yl]thymidine (21).  $^{13}\text{C}$  NMR

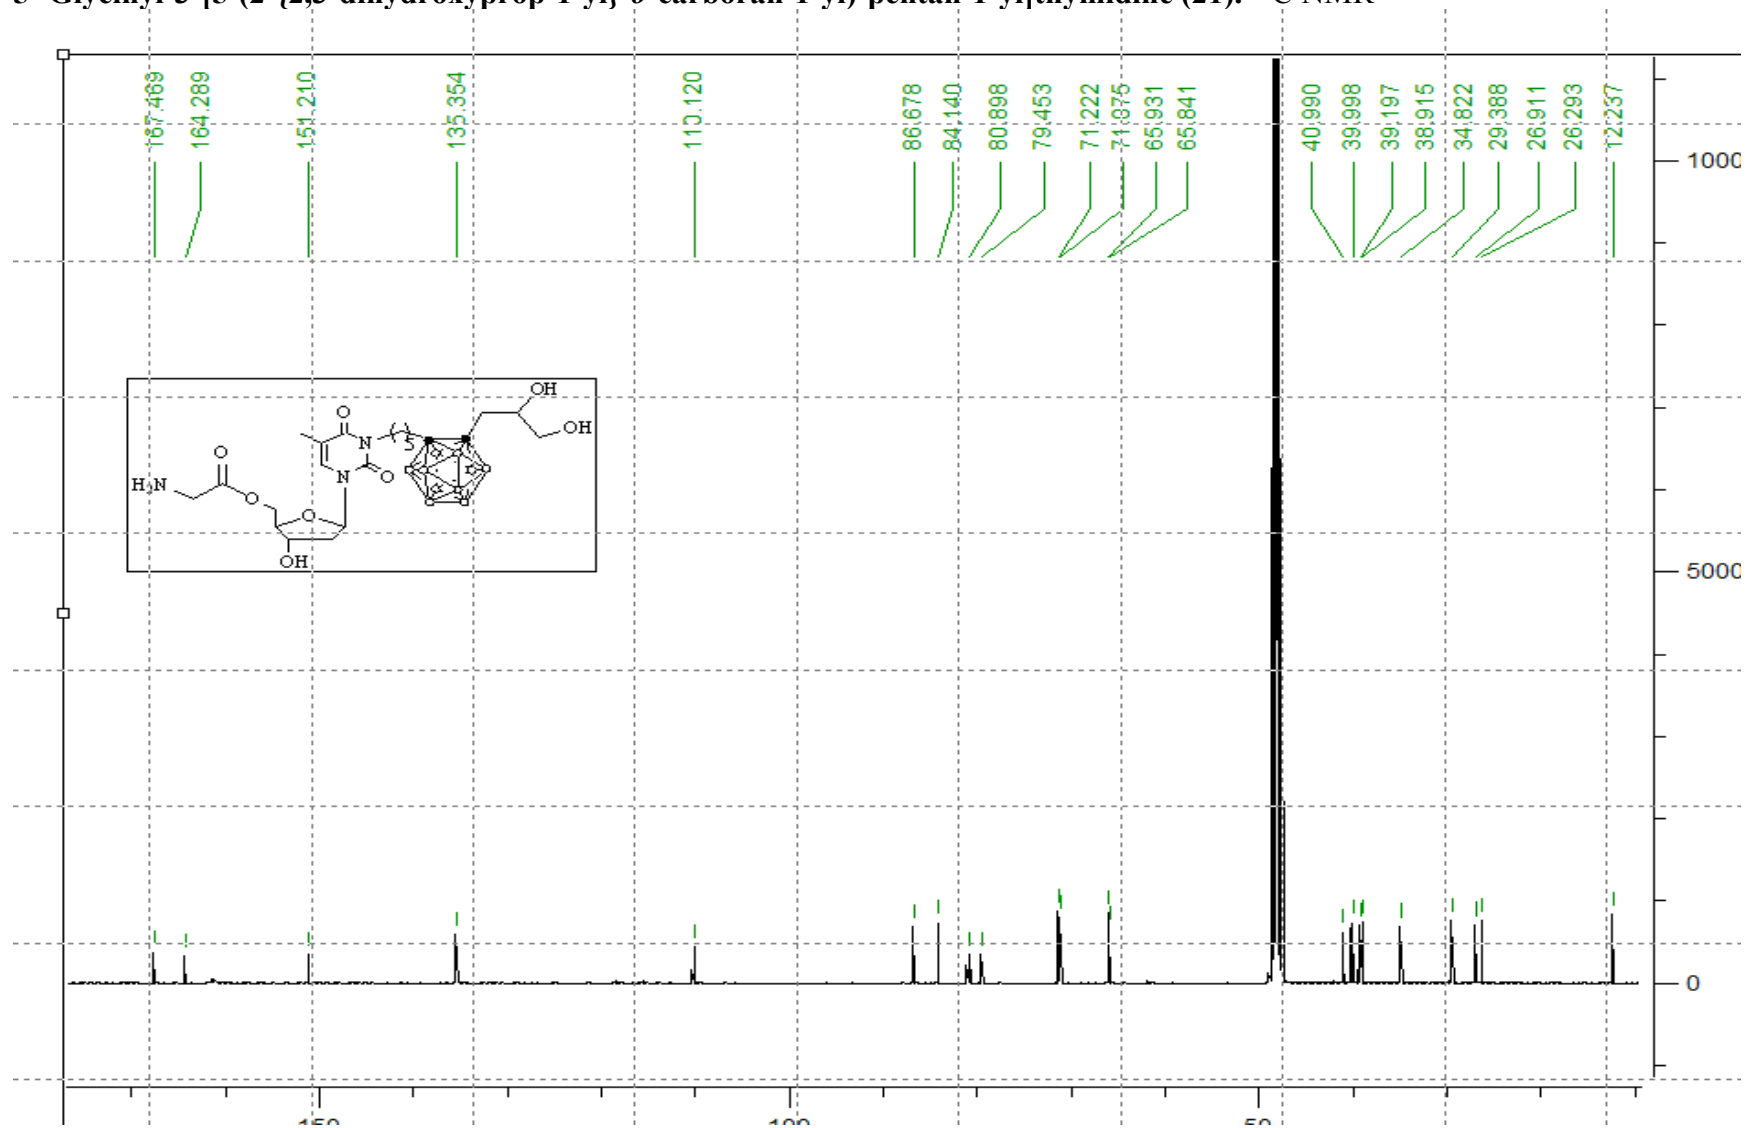

5'-Glycyl-3-[5-(2-{2,3-dihydroxyprop-1-yl}-*o*-carboran-1-yl)-pentan-1-yl]thymidine (21). HR-ESI-MS: found: m/z 586.4107.

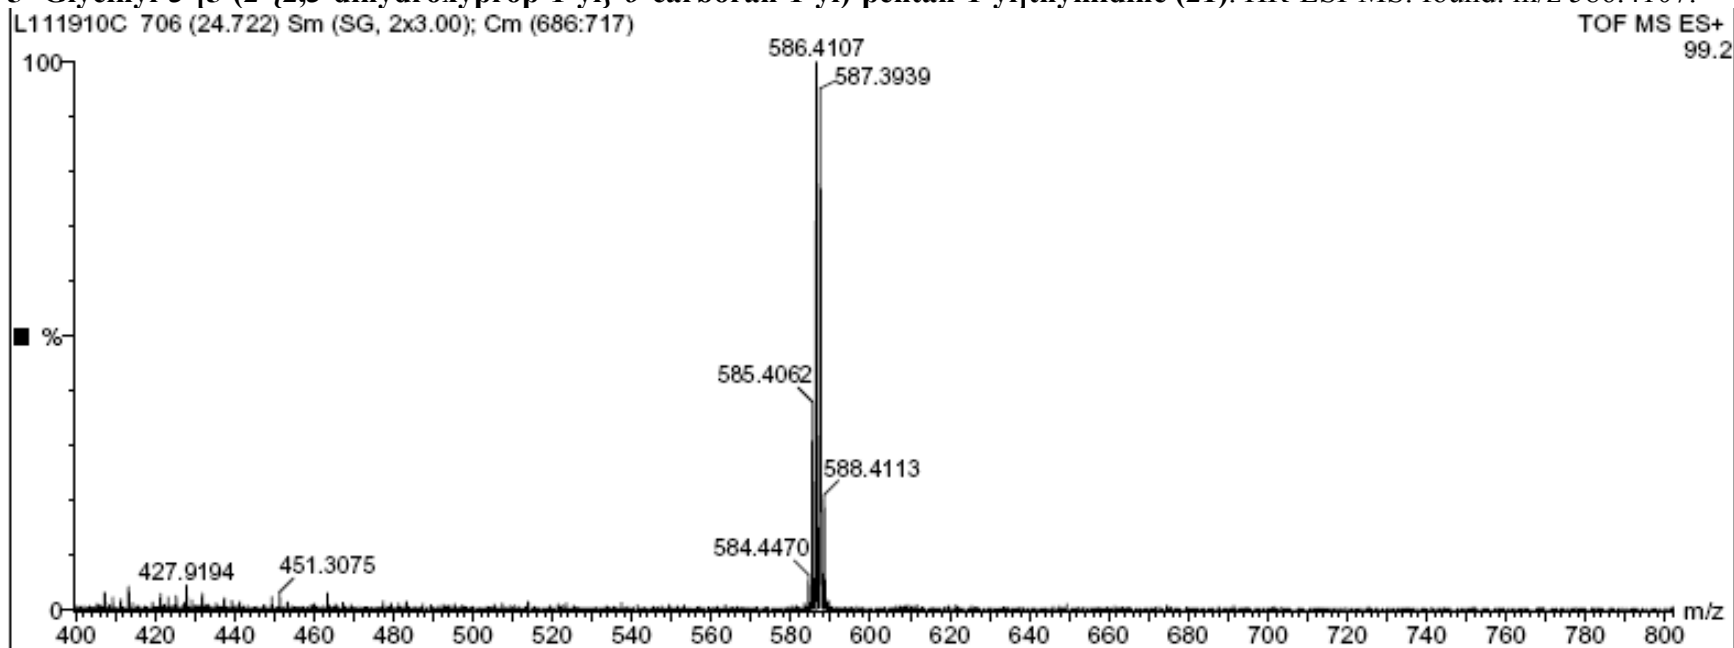

**5'-Glycyl-3-[5-(2-{2,3-dihydroxyprop-1-yl}-*o*-carboran-1-yl)-pentan-1-yl]thymidine (21).** HPLC chromatogram (method A2, Table 3 in manuscript), retention time: 13.51 min.

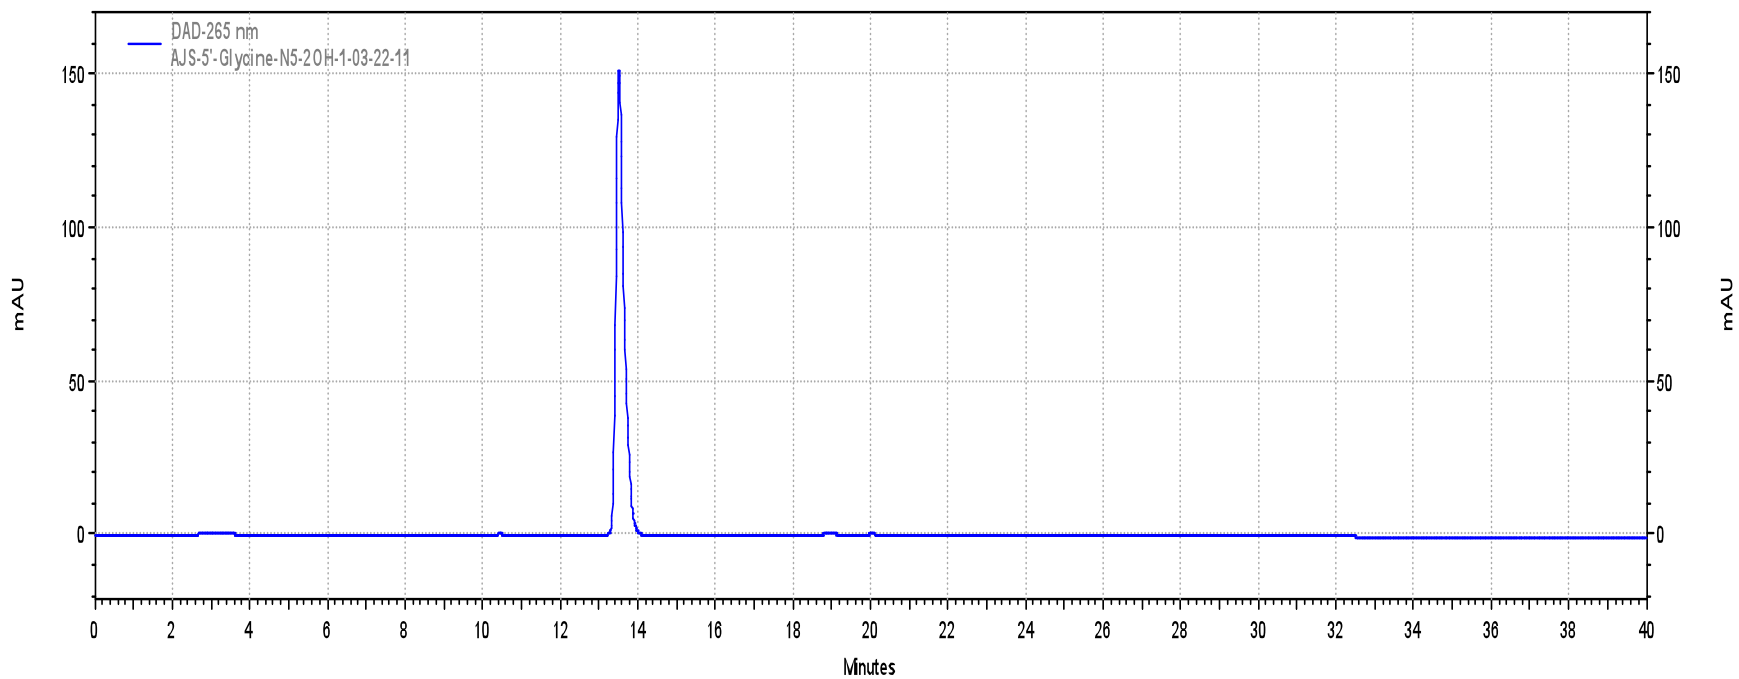

**5'-Glycyl-3-[5-(2-{2,3-dihydroxyprop-1-yl}-*o*-carboran-1-yl)-pentan-1-yl]thymidine (21)**. HPLC chromatogram(method B2, Table 3 in manuscript ), retention time: 28.28 min.

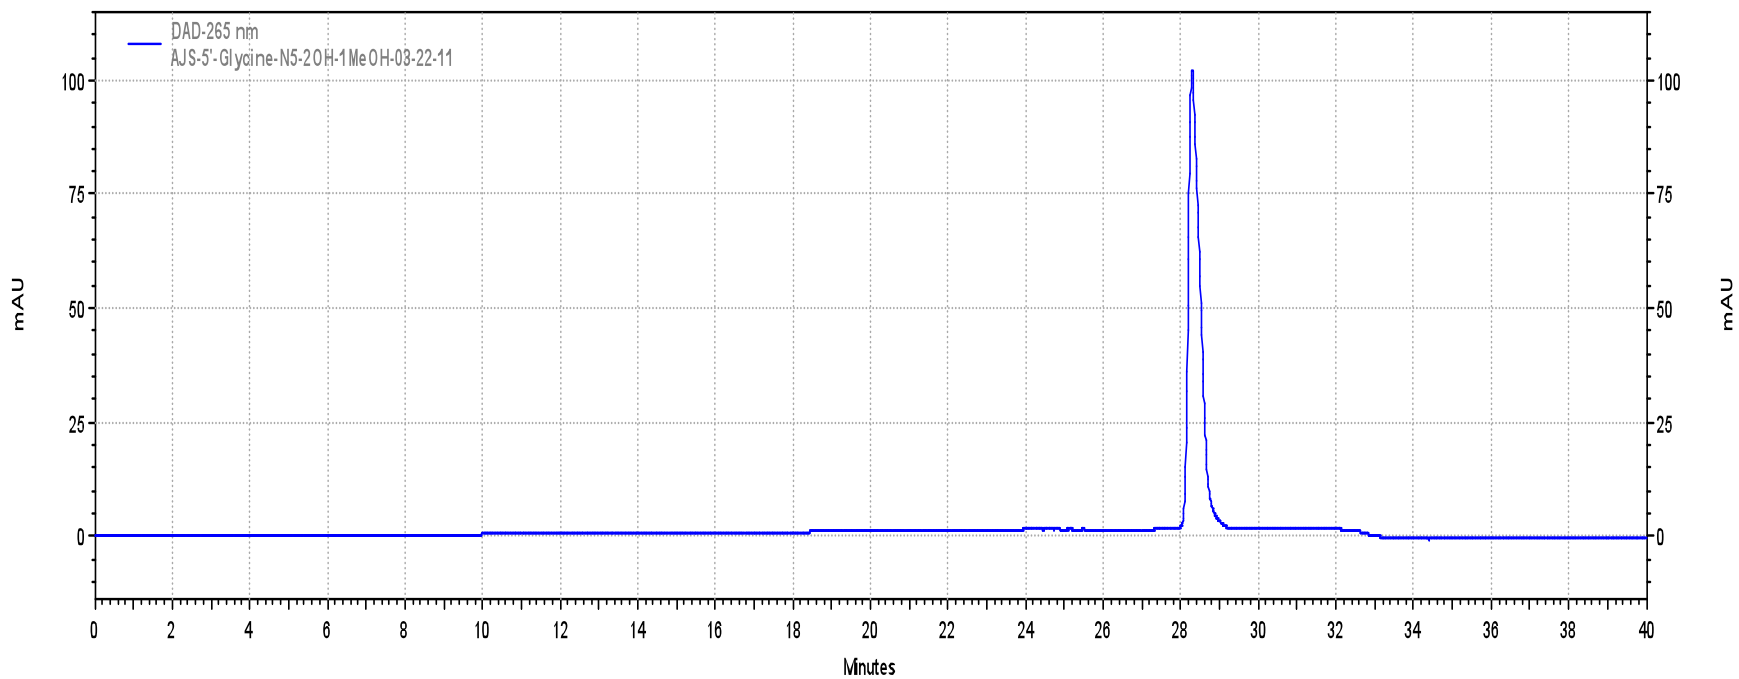



3',5'-Di-glycinyl-3-[5-(2-{2,3-dihydroxyprop-1-yl}-*o*-carboran-1-yl)-pentan-1-yl]thymidine (22). <sup>1</sup>H NMR

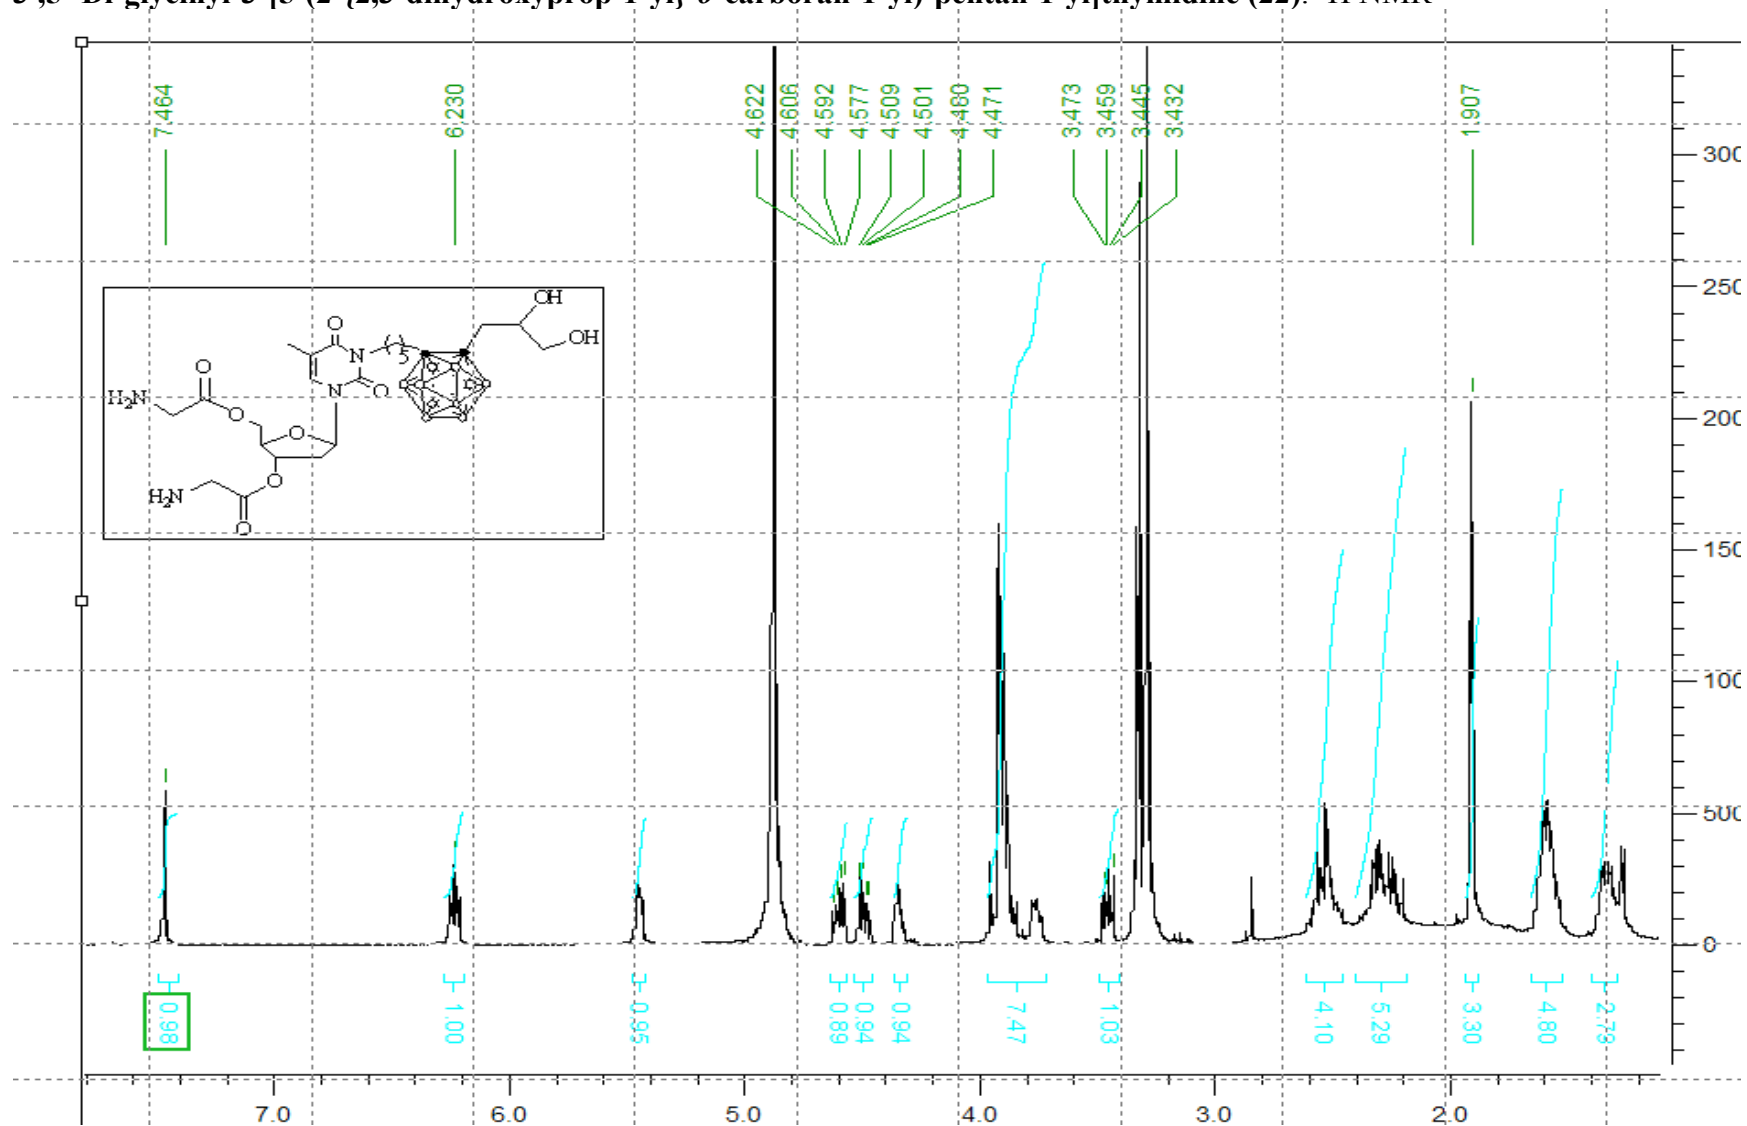

3',5'-Di-glycinyl-3-[5-(2-{2,3-dihydroxyprop-1-yl}-*o*-carboran-1-yl)-pentan-1-yl]thymidine (22). <sup>13</sup>C NMR

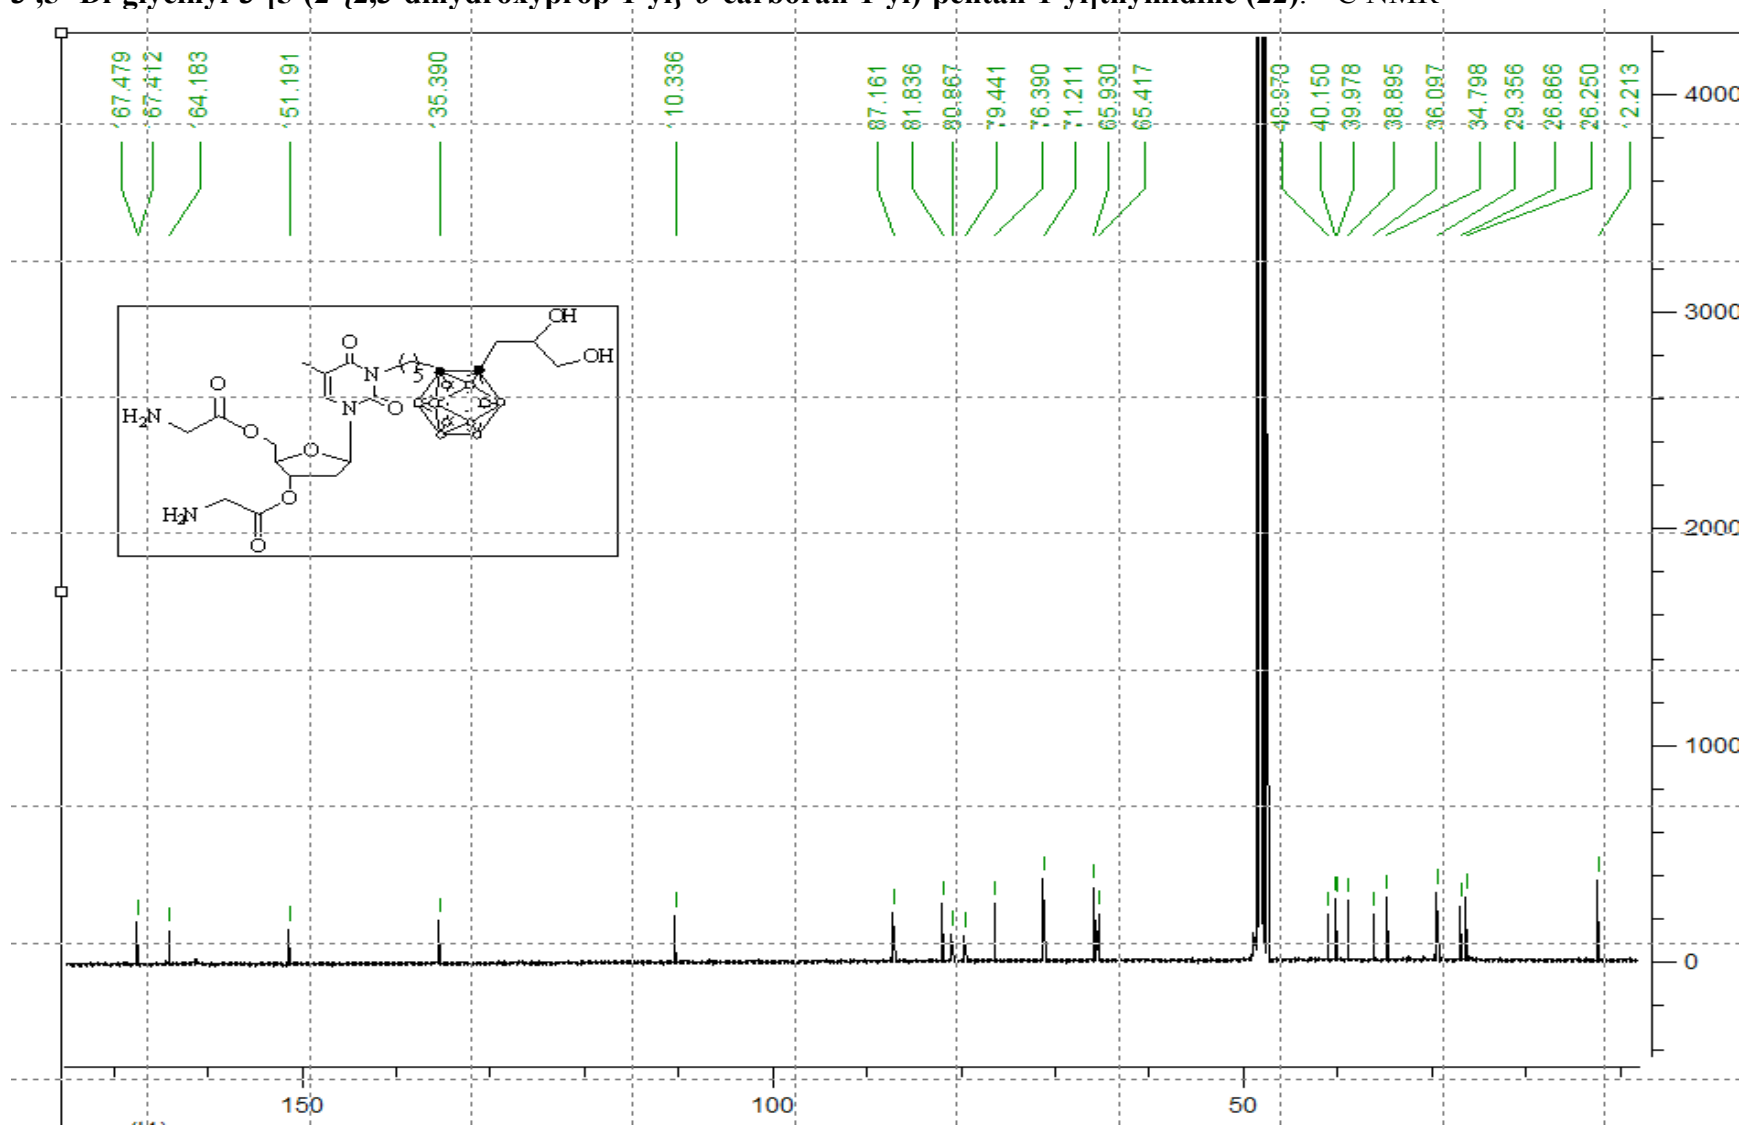

**3',5'-Di-glycinyl-3-[5-(2-{2,3-dihydroxyprop-1-yl}-*o*-carboran-1-yl)-pentan-1-yl]thymidine (22).** HR-ESI-MS: found: m/z 643.4391.

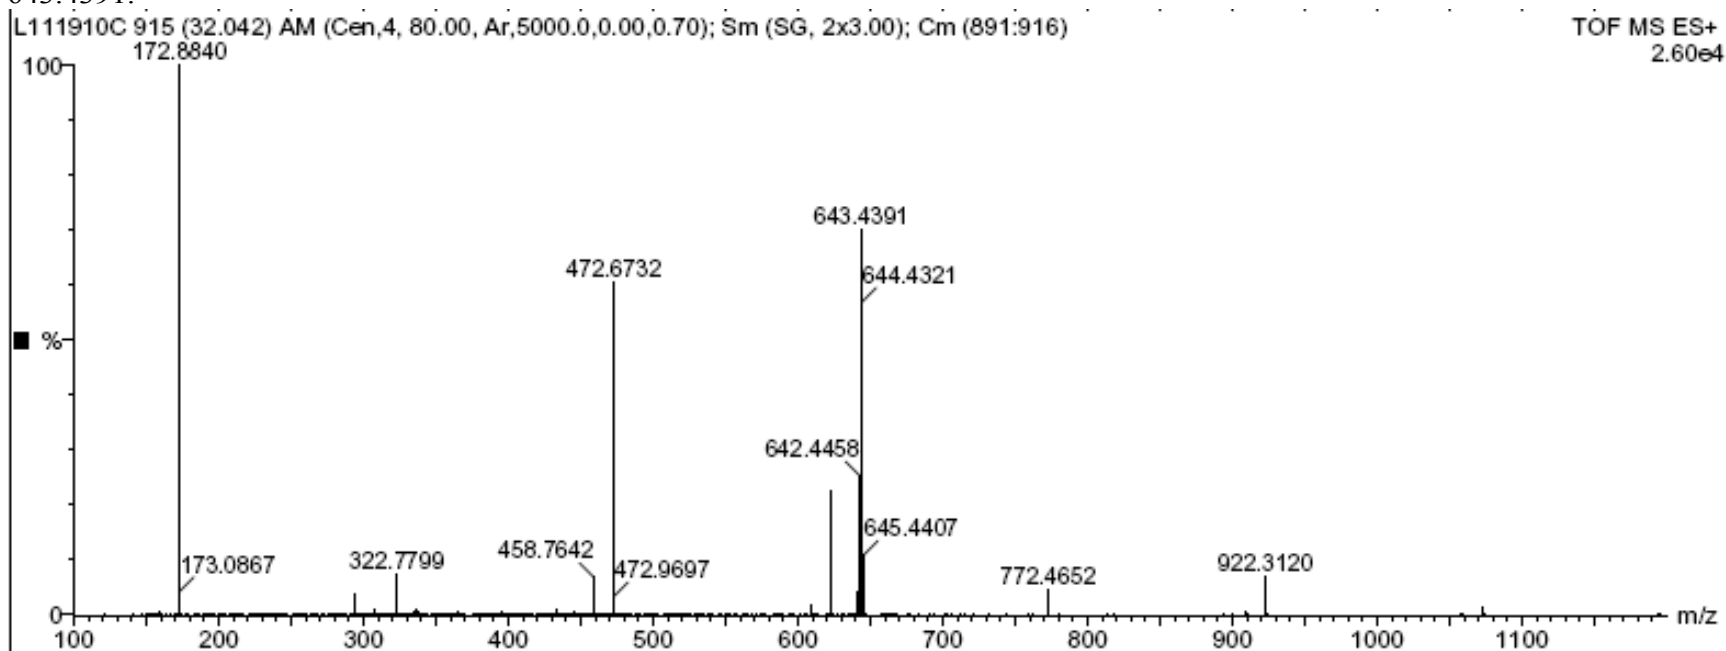

**3',5'-Di-glycinyl-3-[5-(2-{2,3-dihydroxyprop-1-yl}-*o*-carboran-1-yl)-pentan-1-yl]thymidine (22)** HPLC chromatogram (method A2, Table 3 in manuscript), retention time: 10.55 min.

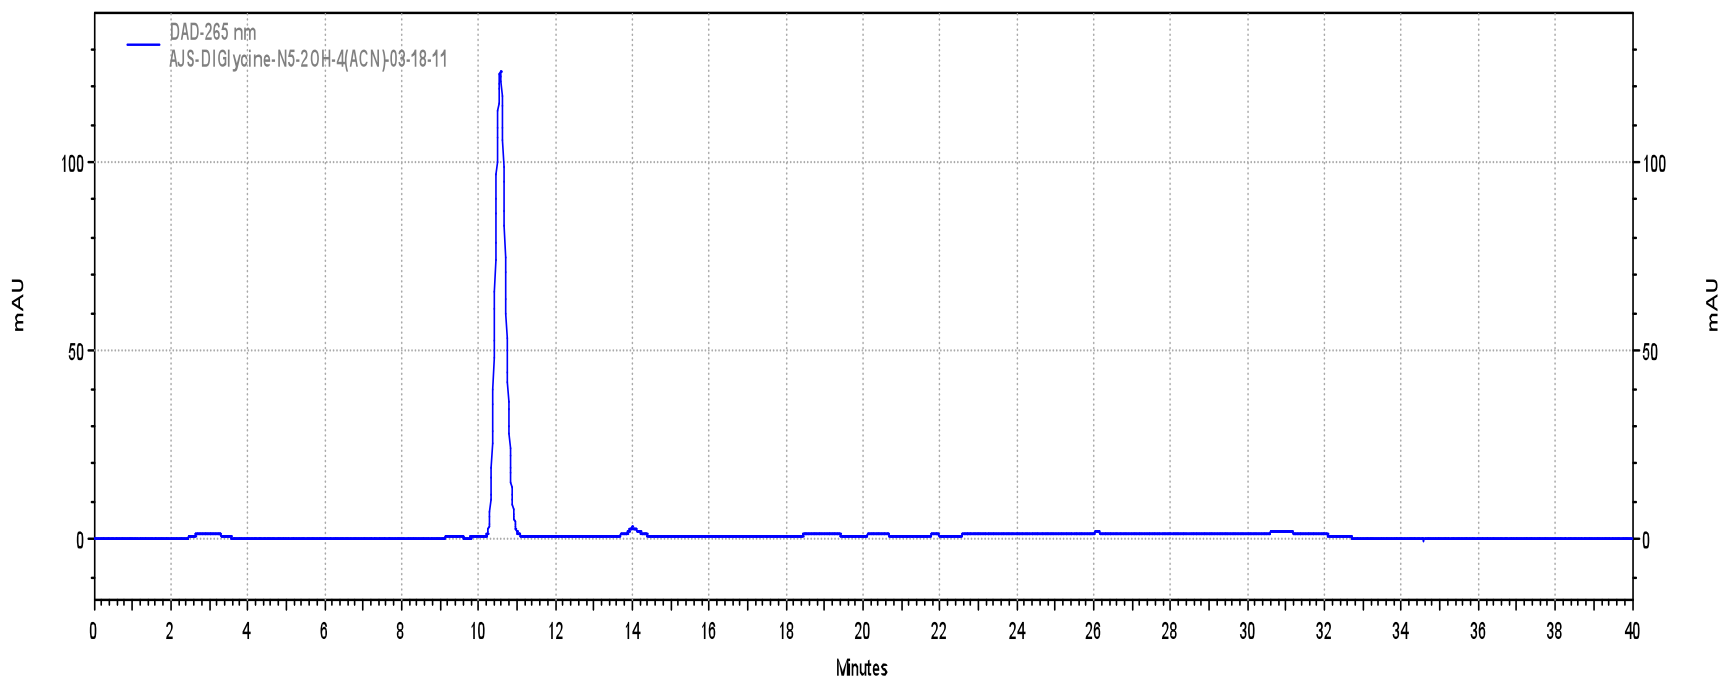

**3',5'-Di-glycinyl-3-[5-(2-{2,3-dihydroxyprop-1-yl}-*o*-carboran-1-yl)-pentan-1-yl]thymidine (22)** HPLC chromatogram (method B2, Table 3 in manuscript), retention time: 23.52 min.

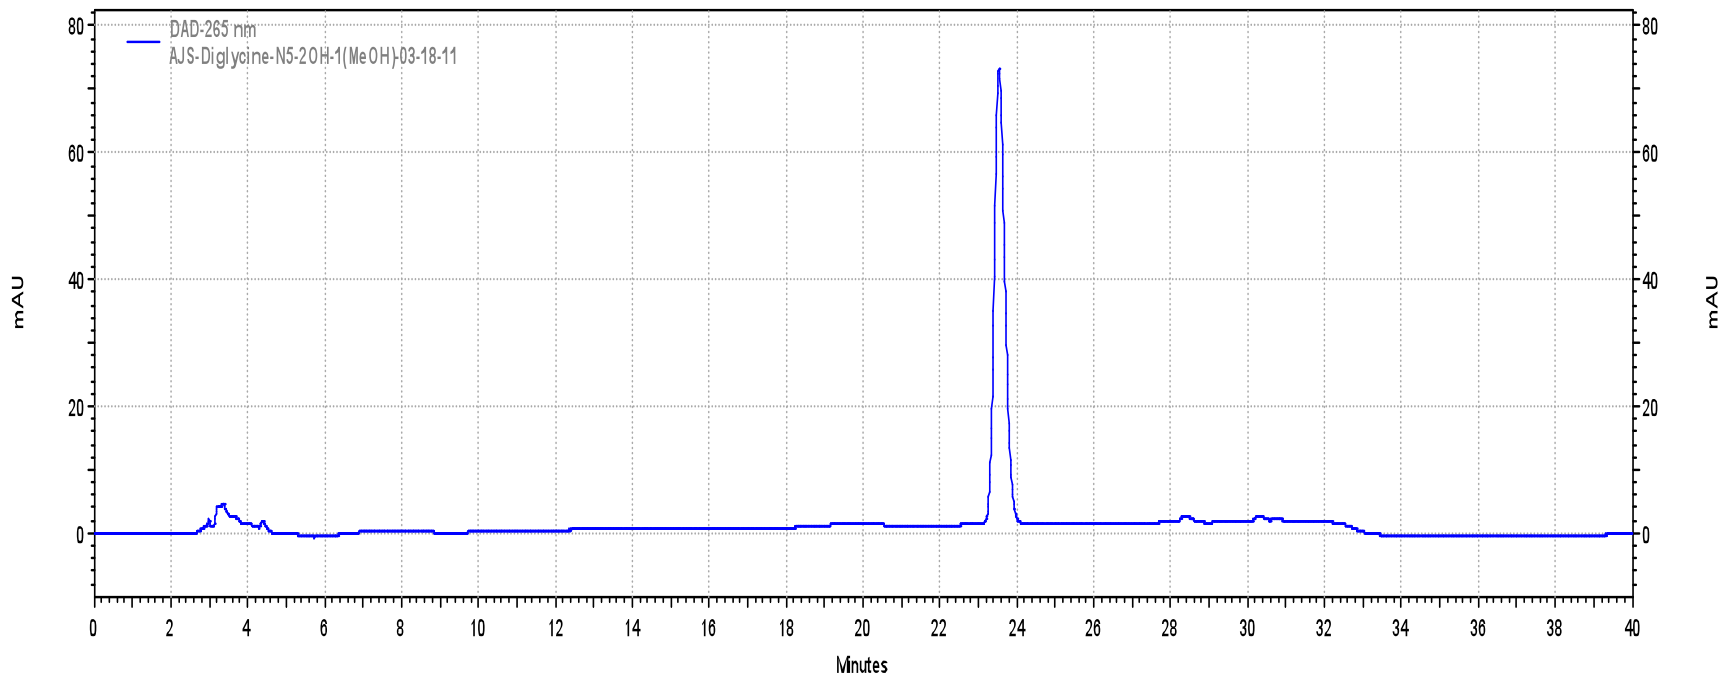

## 2. <sup>1</sup>H-NMR data and R<sub>f</sub> values for Boc-protected forms of the amino acid ester prodrugs 11-22

The progress of the formation of the Boc-protected forms of the amino acid ester prodrugs **11-22** was monitored by TLC (ethyl acetate:hexanes, 8:5).

**3'-Boc-L-valyl-3-(5-{*o*-carboran-1-yl}pentyl)thymidine.** *R<sub>f</sub>* 0.5; <sup>1</sup>H-NMR (CD<sub>3</sub>OD): δ 0.95-1.01 (m, 6H, CH(CH<sub>3</sub>)<sub>2</sub>), 1.34-1.40 (m, 2H, NC<sub>2</sub>H<sub>4</sub>CH<sub>2</sub>), 1.42 (s, 9H, C(CH<sub>3</sub>)<sub>3</sub>), 1.48-1.61 (m, 4H, NCH<sub>2</sub>CH<sub>2</sub>, and CH<sub>2</sub>CH<sub>2</sub>-C<sub>carborane</sub>), 1.93 (s, 3H, CH<sub>3</sub>), 2.04-2.35 (m, 5H, CH<sub>2</sub>-C<sub>carborane</sub>, H-2", H-2', and CH(CH<sub>3</sub>)<sub>2</sub>), 3.82-3.90 (m, 2H, H-5", and H-5'), 3.90 (t, *J* = 6.8 Hz, 2H, CH<sub>2</sub>N), 3.98 (d, *J* = 4.4 Hz, 1H, OCCHNH), 4.14-4.20 (m, 1H, H-4'), 4.51 (s, 1H, carboranyl-CH), 5.31-5.38 (m, 1H, H-3'), 6.30 (t, *J* = 6.8 Hz, 1H, H-1'), 7.86 (s, 1H, H-6).

**5'-Boc-L-valyl-3-(5-{*o*-carboran-1-yl}pentyl)thymidine.** *R<sub>f</sub>* 0.3; <sup>1</sup>H-NMR (CD<sub>3</sub>OD): δ 0.93-0.97 (m, 6H, CH(CH<sub>3</sub>)<sub>2</sub>), 1.28-1.35 (m, 2H, NC<sub>2</sub>H<sub>4</sub>CH<sub>2</sub>), 1.42 (s, 9H, C(CH<sub>3</sub>)<sub>3</sub>), 1.48-1.65 (m, 4H, NCH<sub>2</sub>CH<sub>2</sub>, and CH<sub>2</sub>CH<sub>2</sub>-C<sub>carborane</sub>), 1.93 (s, 3H, CH<sub>3</sub>), 2.04-2.35 (m, 5H, CH<sub>2</sub>-C<sub>carborane</sub>, H-2", H-2', and CH(CH<sub>3</sub>)<sub>2</sub>), 3.89 (t, *J* = 6.8 Hz, 2H, CH<sub>2</sub>N), 4.03 (d, *J* = 4.4 Hz, 1H, OCCHNH), 4.09-4.15 (m, 1H, H-3'), 4.31-4.41 (m, 3H, H-5", H-5', and H-4'), 4.52 (s, 1H, carboranyl-CH), 6.26 (t, *J* = 6.8 Hz, 1H, H-1'), 7.49 (s, 1H, H-6).

**3',5'-Di(Boc-L-valyl)-3-(5-{*o*-carboran-1-yl}pentyl)thymidine.** *R<sub>f</sub>* 0.8; <sup>1</sup>H-NMR (CD<sub>3</sub>OD): δ 0.95-1.05 (m, 12H, 2CH(CH<sub>3</sub>)<sub>2</sub>), 1.34-1.42 (m, 2H, NC<sub>2</sub>H<sub>4</sub>CH<sub>2</sub>), 1.47 (s, 18H, 2C(CH<sub>3</sub>)<sub>3</sub>), 1.57-1.62 (m, 4H, NCH<sub>2</sub>CH<sub>2</sub>, and CH<sub>2</sub>CH<sub>2</sub>-C<sub>carborane</sub>), 1.90 (s, 3H, CH<sub>3</sub>), 2.08-2.17 (m, 4H, CH<sub>2</sub>-C<sub>carborane</sub>, H-2", and H-2'), 2.23-2.30 (m, 1H, CH(CH<sub>3</sub>)<sub>2</sub>), 2.61-2.70 (m, 1H, CH(CH<sub>3</sub>)<sub>2</sub>), 3.92 (t, *J* = 6.8 Hz, 2H, CH<sub>2</sub>N), 3.98 (d, *J* = 4.4 Hz, 2H, 2OCCHNH), 4.14-4.20 (m, 1H, H-4'), 4.52-4.63 (m, 3H, H-5", H-5', and carboranyl-CH), 5.29-5.35 (m, 1H, H-3'), 6.31 (t, *J* = 6.8 Hz, 1H, H-1'), 7.49 (s, 1H, H-6).

**3'-Boc-glyciny-3-(5-{*o*-carboran-1-yl}pentyl)thymidine.**  $R_f$  0.2;  $^1\text{H-NMR}$  ( $\text{CD}_3\text{OD}$ ):  $\delta$  1.27-1.34 (m, 2H,  $\text{NC}_2\text{H}_4\text{CH}_2$ ), 1.43 (s, 9H,  $(\text{CH}_3)_3\text{C}$ ), 1.55-1.65 (m, 4H,  $\text{NCH}_2\text{CH}_2$ , and  $\text{CH}_2\text{CH}_2\text{-C}_{\text{carborane}}$ ), 1.93 (s, 3H,  $\text{CH}_3$ ), 2.23-2.29 (m, 4H,  $\text{CH}_2\text{-C}_{\text{carborane}}$ , H-2" and H-2'), 3.80-3.85 (s, 4H,  $\text{OCCH}_2\text{NH}$ , H-5", H-5'), 3.89 (t,  $J = 6.4$  Hz, 2H,  $\text{CH}_2\text{N}$ ), 4.25-4.33 (m, 1H, H-4'), 4.52 (s, 1H, carboranyl- $\text{CH}$ ), 5.32-5.41 (m, 1H, H-3'), 6.28 (t,  $J = 6.7$  Hz, 1H, H-1'), 7.51 (s, 1H, H-6).

**5'-Boc-glyciny-3-(5-{*o*-carboran-1-yl}pentyl)thymidine.**  $R_f$  0.16;  $^1\text{H-NMR}$  ( $\text{CD}_3\text{OD}$ ):  $\delta$  1.27-1.34 (m, 2H,  $\text{NC}_2\text{H}_4\text{CH}_2$ ), 1.42 (s, 9H,  $(\text{CH}_3)_3\text{C}$ ), 1.46-1.64 (m, 4H,  $\text{NCH}_2\text{CH}_2$ , and  $\text{CH}_2\text{CH}_2\text{-C}_{\text{carborane}}$ ), 1.92 (s, 3H,  $\text{CH}_3$ ), 2.20-2.30 (m, 4H,  $\text{CH}_2\text{-C}_{\text{carborane}}$ , H-2" and H-2'), 3.81-3.84 (s, 2H,  $\text{OCCH}_2\text{NH}$ ), 3.89 (t,  $J = 6.4$  Hz, 2H,  $\text{CH}_2\text{N}$ ), 4.06-4.12 (m, 1H, H-3'), 4.30-4.42 (m, 3H, H-5", H-5', and H-4'), 4.51 (s, 1H, carboranyl- $\text{CH}$ ), 6.26 (t,  $J = 6.7$  Hz, 1H, H-1'), 7.50 (s, 1H, H-6).

**3',5'-Di-Boc-glyciny-3-(5-{*o*-carboran-1-yl}pentyl)thymidine.**  $R_f$  0.42;  $^1\text{H-NMR}$  ( $\text{CD}_3\text{OD}$ ):  $\delta$  1.27-1.34 (m, 2H,  $\text{NC}_2\text{H}_4\text{CH}_2$ ), 1.43 (s, 9H,  $(\text{CH}_3)_3\text{C}$ ), 1.45 (s, 9H,  $(\text{CH}_3)_3\text{C}$ ), 1.50-1.65 (m, 4H,  $\text{NCH}_2\text{CH}_2$ , and  $\text{CH}_2\text{CH}_2\text{-C}_{\text{carborane}}$ ), 1.93 (s, 3H,  $\text{CH}_3$ ), 2.26 (t,  $J = 6.6$  Hz, 2H,  $\text{CH}_2\text{-C}_{\text{carborane}}$ ), 2.40-2.47 (m, 2H, H-2" and H-2'), 3.89-3.95 (m, 6H,  $\text{CH}_2\text{N}$ , and  $2\text{OCCH}_2\text{NH}$ ), 4.27-4.31 (m, 1H, H-4'), 4.40 (dd,  $J = 11.9$ , and  $3.4$  Hz, 1H, H-5"), 4.45 (dd,  $J = 11.9$ , and  $3.4$  Hz, 1H, H-5'), 4.51 (s, 1H, carboranyl- $\text{CH}$ ), 5.32-5.39 (m, 1H, H-3'), 6.26 (t,  $J = 6.7$  Hz, 1H, H-1'), 7.50 (s, 1H, H-6).

**3'-Boc-L-glutam-5-yl-1-tert.-butyl-3-(5-{*o*-carboran-1-yl}pentyl)thymidine.**  $R_f$  0.2;  $^1\text{H-NMR}$  ( $\text{CD}_3\text{OD}$ ):  $\delta$  1.20-1.27 (m, 2H,  $\text{NC}_2\text{H}_4\text{CH}_2$ ), 1.41 (s, 9H,  $(\text{CH}_3)_3\text{C}$ ), 1.44 (s, 9H,  $(\text{CH}_3)_3\text{C}$ ), 1.48-1.64 (m, 4H,  $\text{NCH}_2\text{CH}_2$ , and  $\text{CH}_2\text{CH}_2\text{-C}_{\text{carborane}}$ ), 1.92 (s, 3H,  $\text{CH}_3$ ), 2.20-2.41 (m, 6H,  $\text{CH}_2\text{-C}_{\text{carborane}}$ , H-2", H-2', and  $\text{CH}_2\text{CHNH}$ ), 2.45 (t,  $J = 6.2$  Hz, 2H,  $\text{CH}_2\text{COO}$ ), 3.77-3.81 (m, 2H, H-5", and H-5'), 3.87 (t,  $J = 6.2$  Hz, 2H,  $\text{CH}_2\text{N}$ ), 4.06-4.10 (m, 1H,  $\text{OCCHNH}$ ), 4.41 (m, 1H, H-4'), 4.53 (s, 1H, carboranyl- $\text{CH}$ ), 5.29-5.33 (m, 1H, H-3'), 6.28 (t,  $J = 6.1$  Hz, 1H, H-1'), 7.51 (s, 1H, H-6).

**5'-Boc-L-glutam-5-yl-1-tert.-butyl-3-(5-{*o*-carboran-1-yl}pentyl)thymidine.**  $R_f$  0.4;  $^1\text{H-NMR}$  ( $\text{CD}_3\text{OD}$ ):  $\delta$  1.20-1.26 (m, 2H,  $\text{NC}_2\text{H}_4\text{CH}_2$ ), 1.43 (s, 9H,  $(\text{CH}_3)_3\text{C}$ ), 1.44 (s, 9H,  $(\text{CH}_3)_3\text{C}$ ), 1.48-1.64 (m, 4H,  $\text{NCH}_2\text{CH}_2$ , and  $\text{CH}_2\text{CH}_2\text{-C}_{\text{carborane}}$ ), 1.92 (s, 3H,  $\text{CH}_3$ ), 2.15-2.35 (m, 6H,  $\text{CH}_2\text{-C}_{\text{carborane}}$ , H-2'', H-2', and  $\text{CH}_2\text{CHNH}$ ), 2.47 (t,  $J = 6.2$  Hz, 2H,  $\text{CH}_2\text{COO}$ ), 3.85-3.92 (m, 3H,  $\text{CH}_2\text{N}$ , and H-3'), 4.23-4.32 (m, 2H,  $\text{OCCHNH}$ , and H-5''), 4.33-4.41 (m, 2H, H-4', and H-5'), 4.53 (s, 1H, carboranyl- $\text{CH}$ ), 6.27 (t,  $J = 6.1$  Hz, 1H, H-1'), 7.51 (s, 1H, H-6).

**3',5'-Di-Boc-L-glutam-5-yl-1-tert.-butyl ester-3-(5-{*o*-carboran-1-yl}pentyl)thymidine.**  $R_f$  0.7;  $^1\text{H-NMR}$  ( $\text{CD}_3\text{OD}$ ):  $\delta$  1.27-1.38 (m, 2H,  $\text{NC}_2\text{H}_4\text{CH}_2$ ), 1.44 (s, 18H,  $2(\text{CH}_3)_3\text{C}$ ), 1.47 (s, 18H,  $2(\text{CH}_3)_3\text{C}$ ), 1.55-1.70 (m, 4H,  $\text{NCH}_2\text{CH}_2$ , and  $\text{CH}_2\text{CH}_2\text{-C}_{\text{carborane}}$ ), 1.92 (s, 3H,  $\text{CH}_3$ ), 2.05-2.18 (m, 4H,  $\text{CH}_2\text{-C}_{\text{carborane}}$ , H-2'', and H-2'), 2.23-2.29 (m, 4H,  $2\text{CH}_2\text{CHNH}$ ), 2.40-2.52 (m, 4H,  $2\text{CH}_2\text{COO}$ ), 3.89 (t,  $J = 7.2$  Hz, 2H,  $\text{CH}_2\text{N}$ ), 3.93-4.99 (m, 2H,  $2\text{OCCHNH}$ ), 4.25-4.31 (m, 1H, H-4'), 4.35 (dd,  $J = 11.9$ , and 3.4 Hz, 1H, H-5''), 4.44 (dd,  $J = 11.9$ , and 3.4 Hz, 1H, H-5'), 4.52 (s, 1H, carboranyl- $\text{CH}$ ), 5.26-5.31 (m, 1H, H-3'), 6.25 (t,  $J = 6.1$  Hz, 1H, H-1'), 7.52 (s, 1H, H-6).

**3'-Boc-glycynyl-3-(5-{2-[(2,2-dimethyl-1,3-dioxolane-4-yl)methyl]-*o*-carboran-1-yl}pentyl)thymidine.**  $R_f$  0.5;  $^1\text{H-NMR}$  ( $\text{CD}_3\text{OD}$ ):  $\delta$  1.28-1.41 (m, 8H,  $(\text{CH}_3)_2\text{C}$  and  $\text{NC}_2\text{H}_4\text{CH}_2$ ), 1.43 (s, 9H,  $(\text{CH}_3)_3\text{C}$ ), 1.53-1.64 (m, 4H,  $\text{NCH}_2\text{CH}_2$ , and  $\text{CH}_2\text{CH}_2\text{-C}_{\text{carborane}}$ ), 1.91 (s, 3H,  $\text{CH}_3$ ), 2.19-2.40 (m, 4H,  $\text{CH}_2\text{-C}_{\text{carborane}}$ , H-2'' and H-2'), 2.45-2.61 (m, 2H,  $\text{CHCH}_2\text{-C}_{\text{carborane}}$ ), 3.45-3.77 (m, 2H,  $\text{CH}_2\text{O}$ ), 3.79-3.88 (m, 2H, H-5'' and H-5'), 3.89-3.97 (m, 4H,  $\text{CH}_2\text{N}$ , and  $\text{OCCH}_2\text{NH}$ ), 4.01-4.09 (m, 1H,  $\text{CH}_2\text{CHO}$ ), 4.31-4.36 (m, 1H, H-4'), 5.40-5.46 (m, 1H, H-3'), 6.23 (t,  $J = 6.7$  Hz, 1H, H-1'), 7.46 (s, 1H, H-6).

**5'-Boc-glycynyl-3-(5-{2-[(2,2-dimethyl-1,3-dioxolane-4-yl)methyl]-*o*-carboran-1-yl}pentyl)thymidine.**  $R_f$  0.4,  $^1\text{H-NMR}$  ( $\text{CD}_3\text{OD}$ ):  $\delta$  1.24-1.40 (m, 8H,  $(\text{CH}_3)_2\text{C}$  and  $\text{NC}_2\text{H}_4\text{CH}_2$ ), 1.44 (s, 9H,  $(\text{CH}_3)_3\text{C}$ ), 1.51-1.62 (m, 4H,  $\text{NCH}_2\text{CH}_2$ , and  $\text{CH}_2\text{CH}_2\text{-C}_{\text{carborane}}$ ), 1.91 (s, 3H,  $\text{CH}_3$ ), 2.18-2.38 (m, 4H,  $\text{CH}_2\text{-C}_{\text{carborane}}$ , H-2'' and H-2'), 2.51 (d,  $J = 4.4$  Hz, 2H,  $\text{CH}_2\text{-C}_{\text{carborane}}$ ), 3.27-3.36 (m, 2H,  $\text{CH}_2\text{O}$ ), 3.72-



3.80 (m, 1H, H-3'), 3.82-3.94 (m, 4H, OCCH<sub>2</sub>NH, and CH<sub>2</sub>N), 4.02-4.08 (m, 1H, CH<sub>2</sub>CHO), 4.31-4.38 (m, 1H, H-4'), 4.43 (dd,  $J = 11.7$ , and 3.6 Hz, 1H, H-5''), 4.49 (dd,  $J = 11.7$ , and 3.6 Hz, 1H, H-5'), 6.24 (t,  $J = 6.7$  Hz, 1H, H-1'), 7.44 (s, 1H, H-6).

**3',5'-Di-Boc-glycinyl-3-(5-{2-[(2,2-dimethyl-1,3-dioxolane-4-yl)methyl]-*o*-carboran-1-yl}pentyl)thymidine.**  $R_f = 0.7$ , <sup>1</sup>H-NMR (CD<sub>3</sub>OD):  $\delta$  1.25-1.42 (m, 8H, (CH<sub>3</sub>)<sub>2</sub>C and NC<sub>2</sub>H<sub>4</sub>CH<sub>2</sub>), 1.43 (s, 9H, (CH<sub>3</sub>)<sub>3</sub>C), 1.45 (s, 9H, (CH<sub>3</sub>)<sub>3</sub>C), 1.53-1.64 (m, 4H, NCH<sub>2</sub>CH<sub>2</sub>, and CH<sub>2</sub>CH<sub>2</sub>-C<sub>carborane</sub>), 1.91 (s, 3H, CH<sub>3</sub>), 2.22-2.40 (m, 4H, CH<sub>2</sub>-C<sub>carborane</sub>, H-2'' and H-2'), 2.46-2.60 (m, 2H, CH<sub>2</sub>-C<sub>carborane</sub>), 3.45-3.71 (m, 2H, CH<sub>2</sub>O), 3.82-3.98 (m, 6H, CH<sub>2</sub>N and 2OCCH<sub>2</sub>NH), 4.01-4.06 (m, 1H, CH<sub>2</sub>CHO), 4.32-4.37 (m, 1H, H-4'), 4.49 (dd,  $J = 11.7$ , and 3.6 Hz, 1H, H-5''), 4.59 (dd,  $J = 11.7$ , and 3.6 Hz, 1H, H-5'), 5.42-5.48 (m, 1H, H-3'), 6.23 (t,  $J = 6.7$  Hz, 1H, H-1'), 7.46 (s, 1H, H-6).

3. The percentage of the remaining concentrations of the amino acid ester prodrugs following incubation in phosphate buffer saline (PBS), Bovine serum, and Bovine cerebrospinal fluid (CSF) at 37 °C at various time intervals

a. The percentage of the remaining concentrations of the amino acid ester prodrugs **11-19**, and **21** following incubation in PBS at 37 °C at various time intervals.

**3'-L-Valyl-3-(5-{*o*-carboran-1-yl}pentan-1-yl)thymidine (11).**

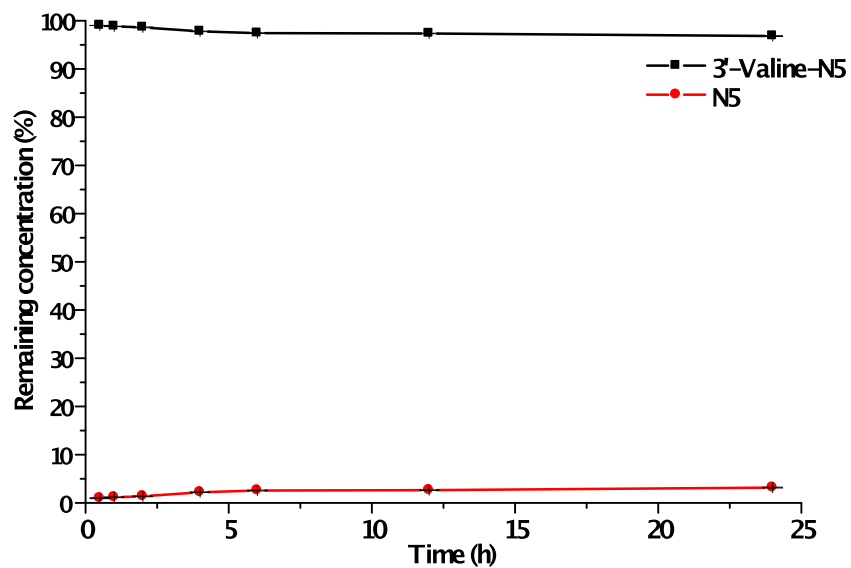

5'-L-Valyl-3-(5-{*o*-carboran-1-yl}pentan-1-yl)thymidine (12).

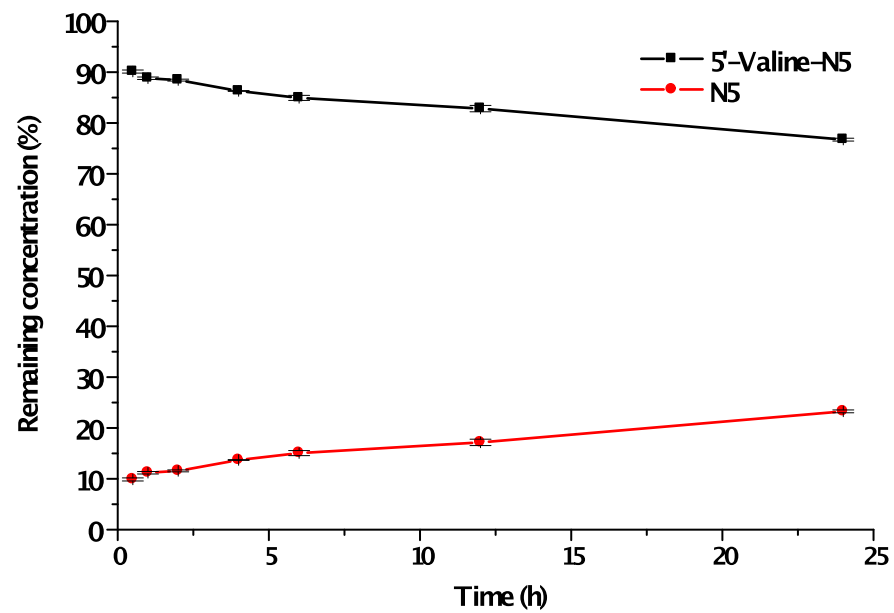

3',5'-Di-L-valyl-3-(5-{*o*-carboran-1-yl}pentan-1-yl)thymidine (13).

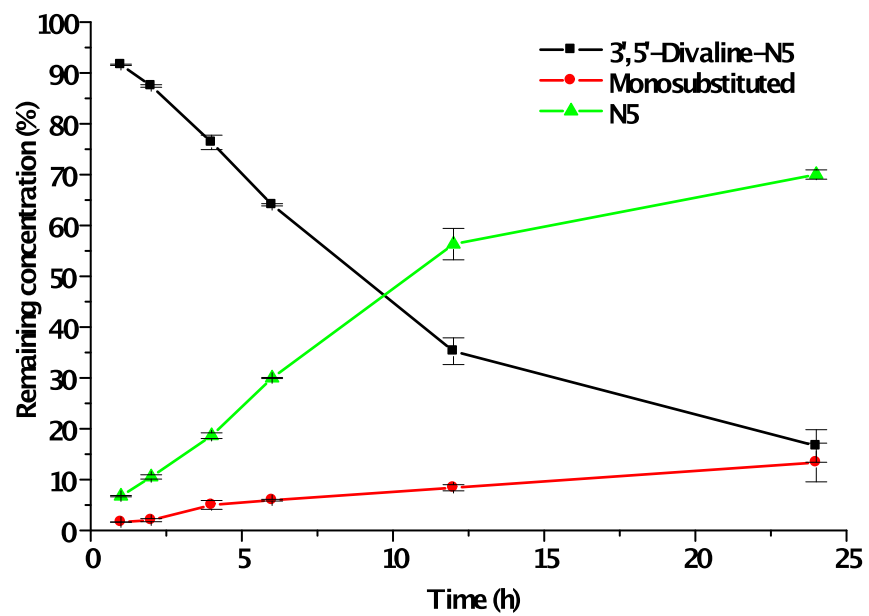

3'-Glycyl-3-(5-{*o*-carboran-1-yl}pentan-1-yl)thymidine (14).

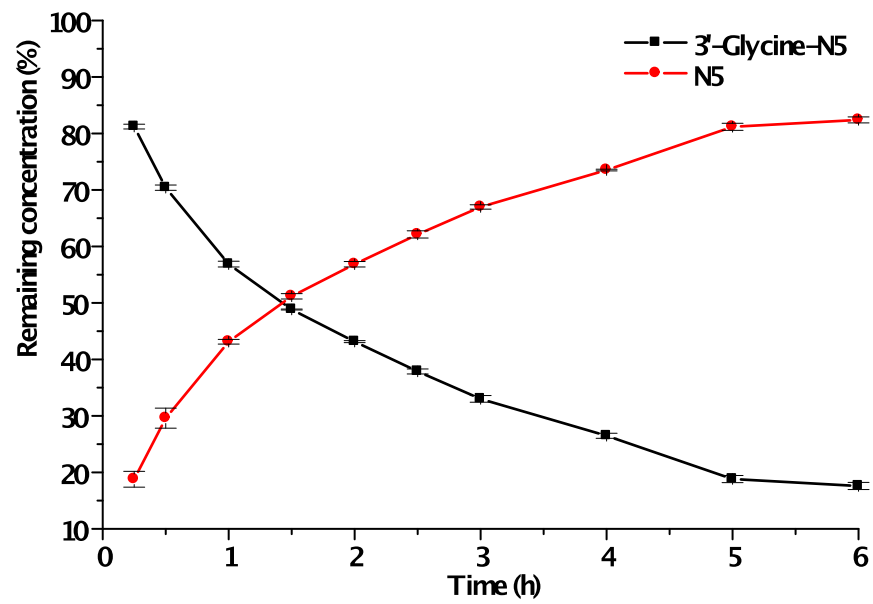

5'-Glycyl-3-(5-{*o*-carboran-1-yl}pentan-1-yl)thymidine (15).

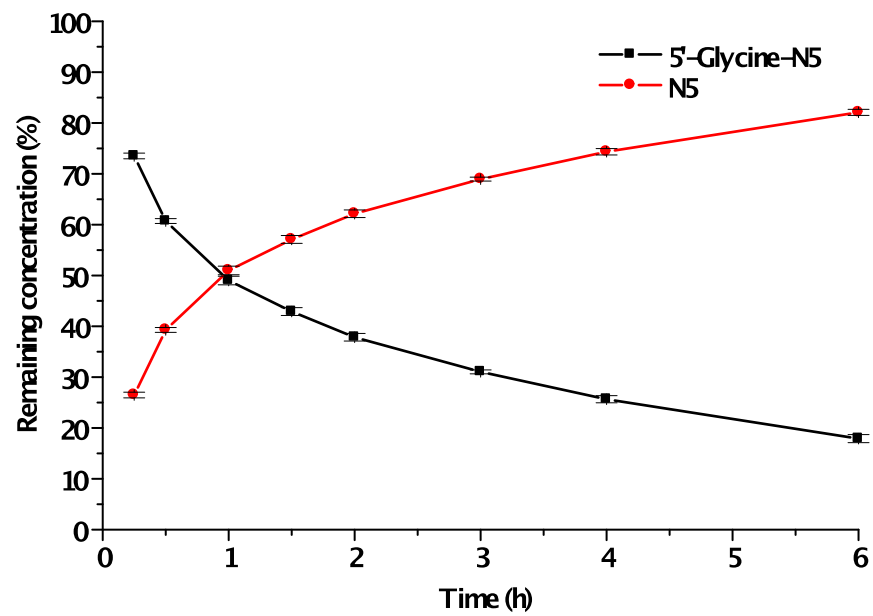

3',5'-Di-glyciny-3-(5-{*o*-carboran-1-yl}pentan-1-yl)thymidine (16).

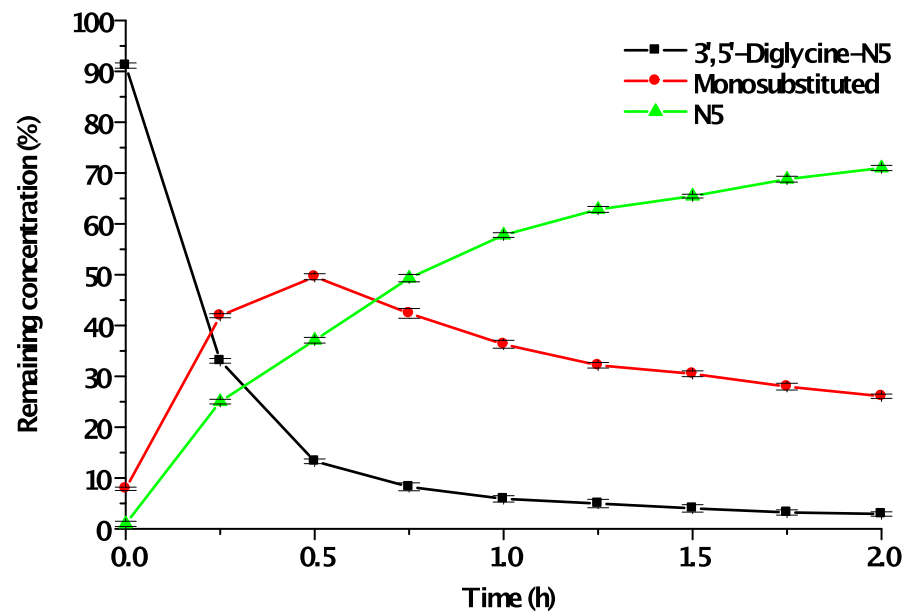

3'-L-Glutam-5-yl-3-(5-{*o*-carboran-1-yl}pentan-1-yl)thymidine (17).

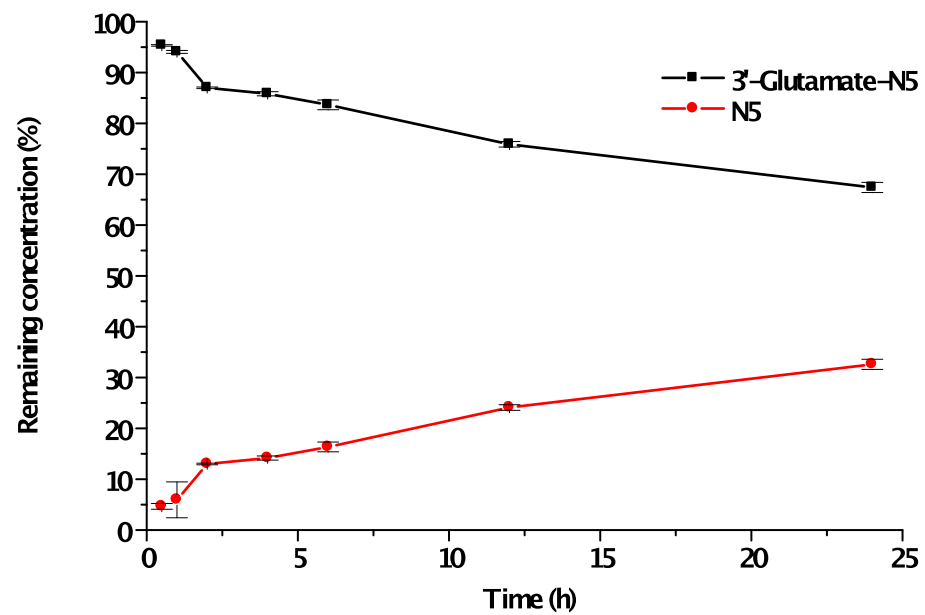



5'-L-Glutam-5-yl-3-(5-{*o*-carboran-1-yl}pentan-1-yl)thymidine (18).

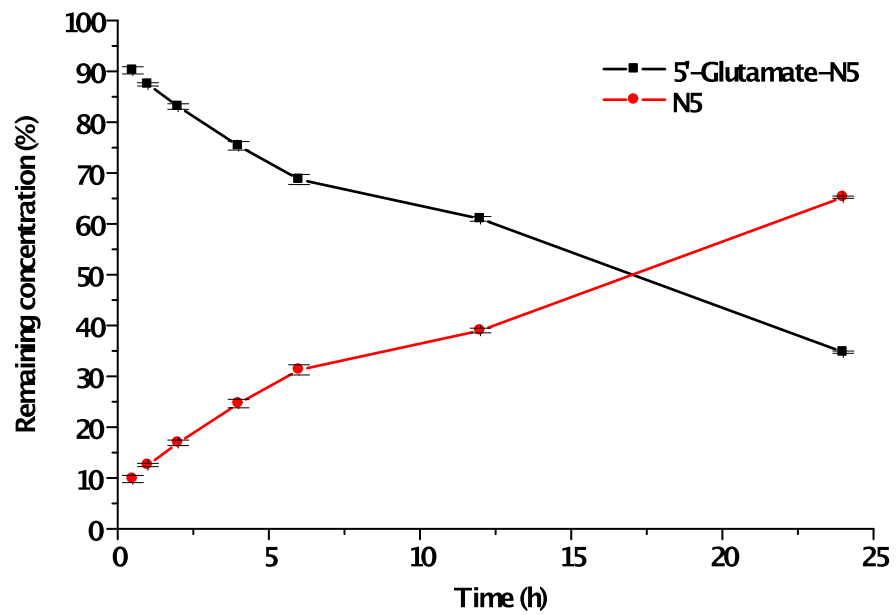

3',5'-Di-L-glutam-5-yl-3-(5-{*o*-carboran-1-yl}pentan-1-yl)thymidine (19).

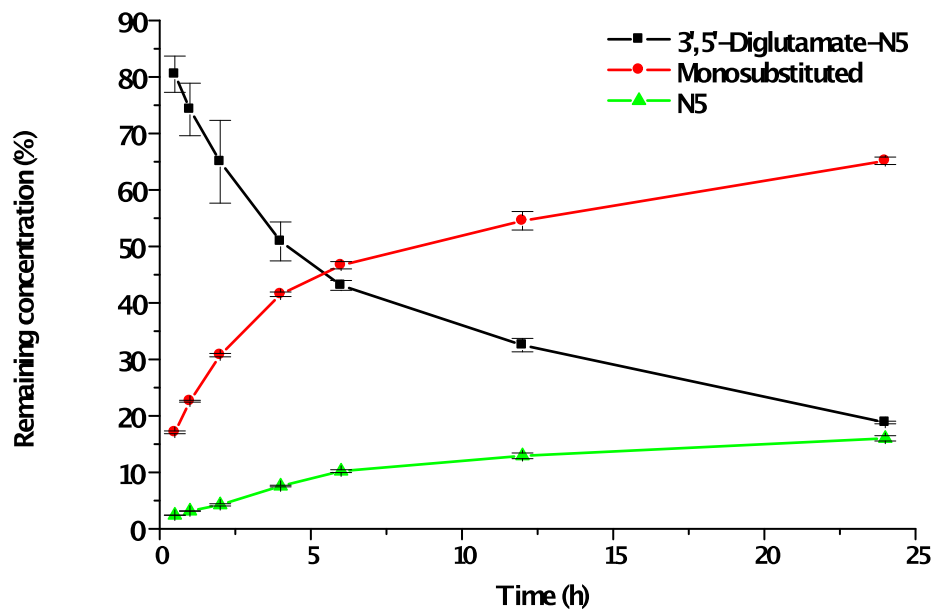

5'-Glycyl-3-[5-(2-{2,3-dihydroxyprop-1-yl}-*o*-carboran-1-yl)pentan-1-yl]thymidine (21).

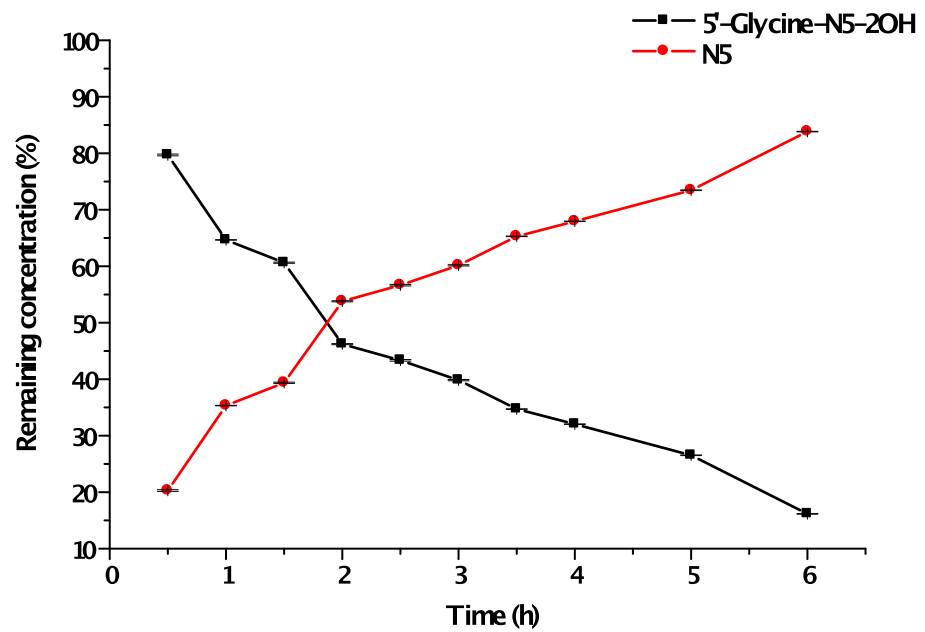

b. The percentage of the remaining concentrations of the amino acid ester prodrugs **12**, **15**, **18**, and **21** following incubation in Bovine serum at 37 °C at various time intervals.

**5'-L-Valyl-3-(5-{*o*-carboran-1-yl}pentan-1-yl)thymidine (12).**

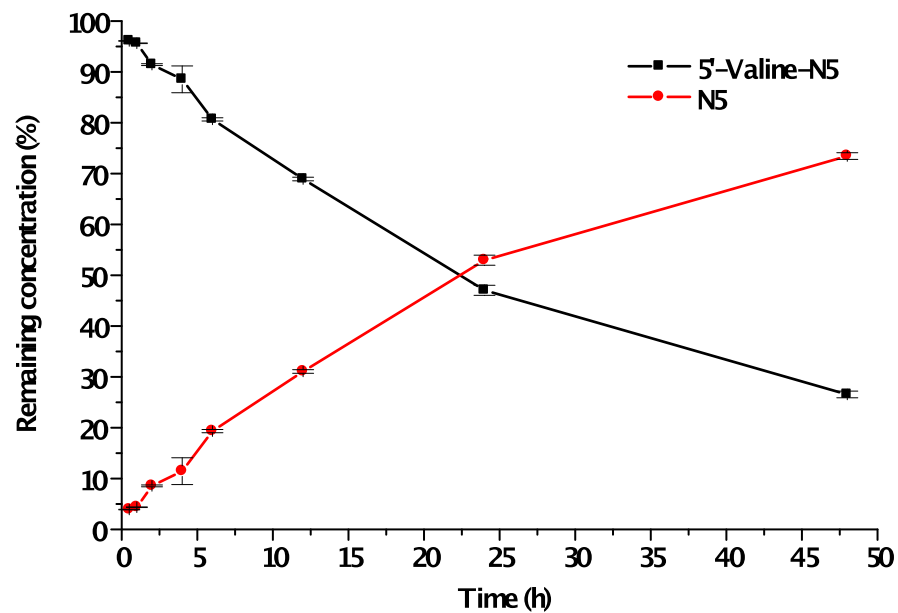

5'-Glycyl-3-(5-*o*-carboran-1-yl)pentan-1-yl)thymidine (15).

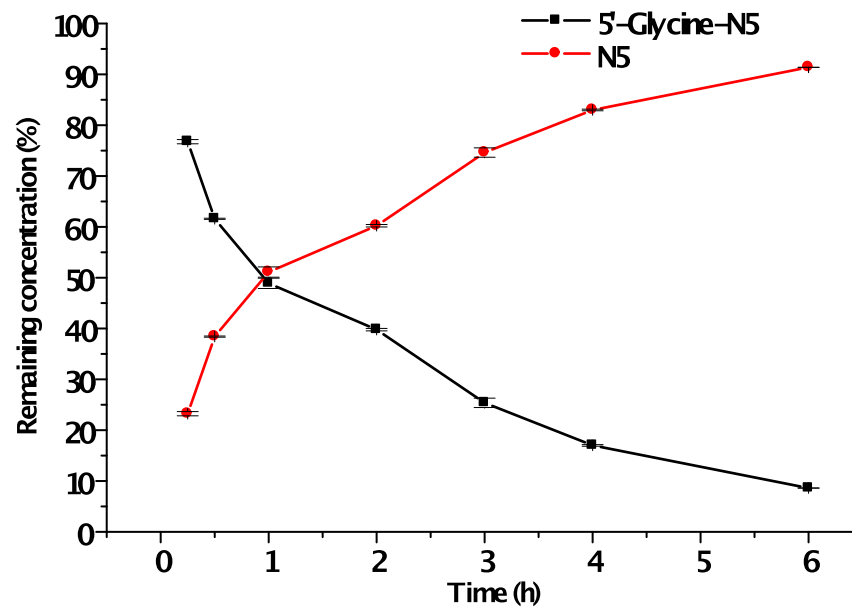

5'-L-Glutam-5-yl-3-(5-{*o*-carboran-1-yl}pentan-1-yl)thymidine (18).

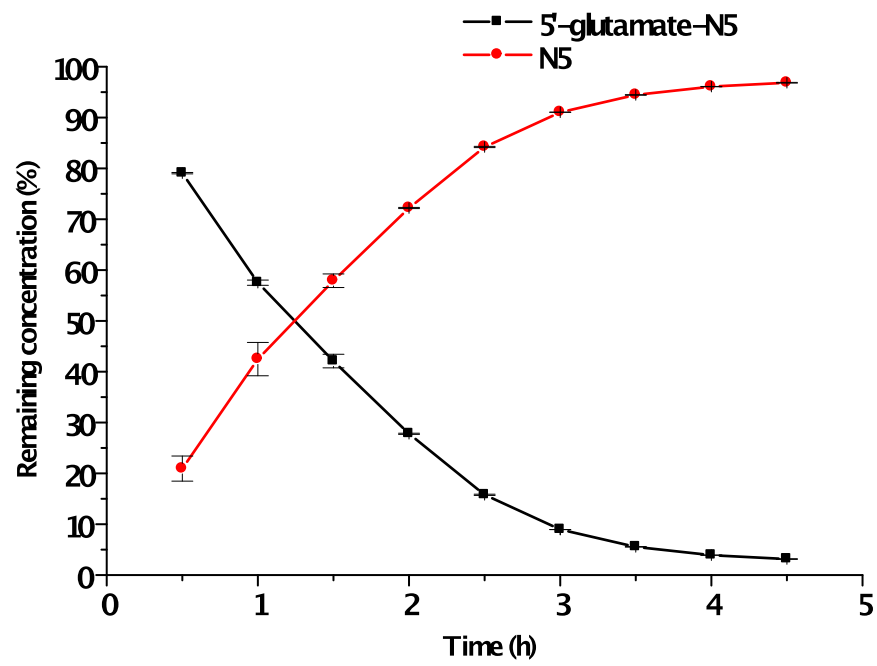

5'-Glyciny-3-[5-(2-{2,3-dihydroxyprop-1-yl}-*o*-carboran-1-yl)pentan-1-yl]thymidine (21).

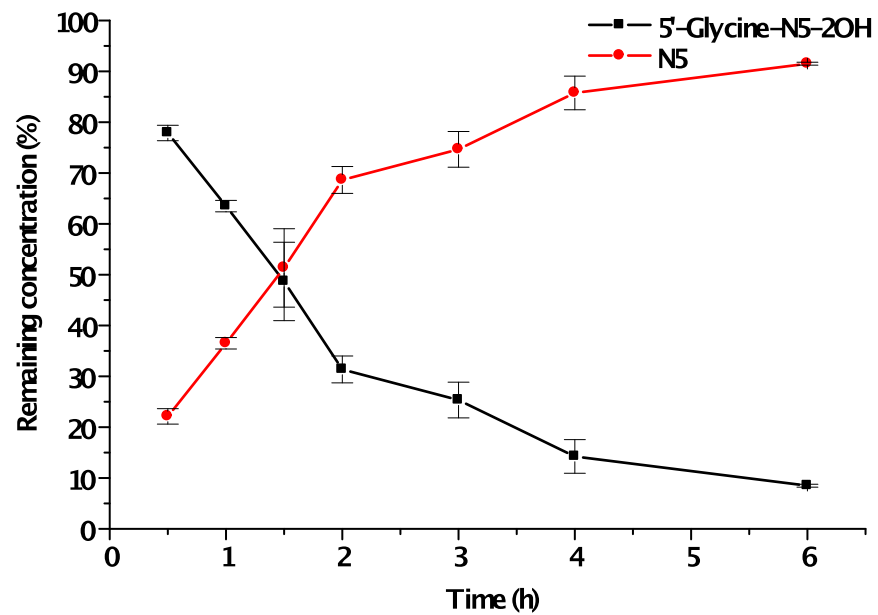

- c. The percentage of the remaining concentrations of the amino acid ester prodrugs **12**, **15**, **18**, and **21** following incubation in CSF at 37 °C at different time intervals.

**5'-L-Valyl-3-(5-{*o*-carboran-1-yl}pentan-1-yl)thymidine (12).**

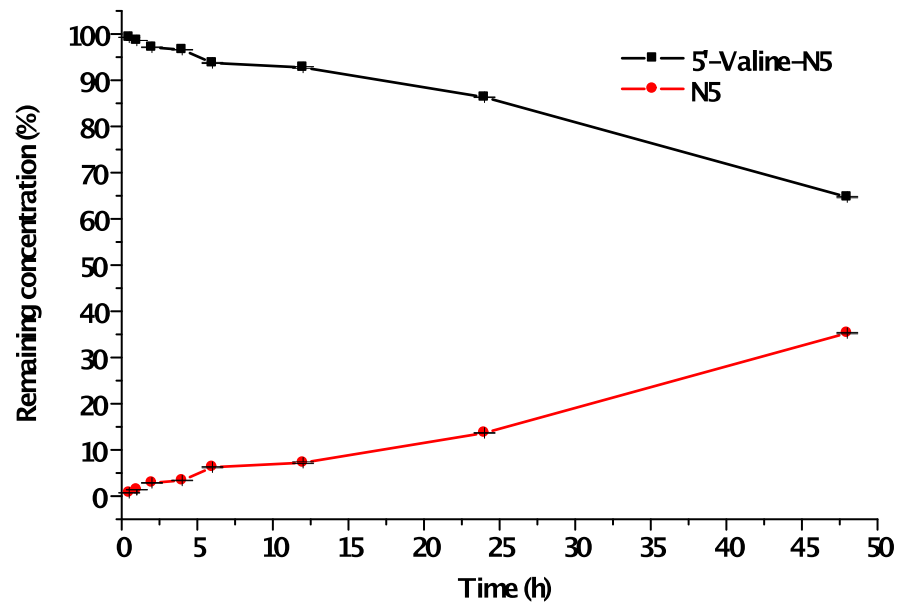



5'-Glyciny-3-(5-*o*-carboran-1-yl)pentan-1-yl)thymidine (15).

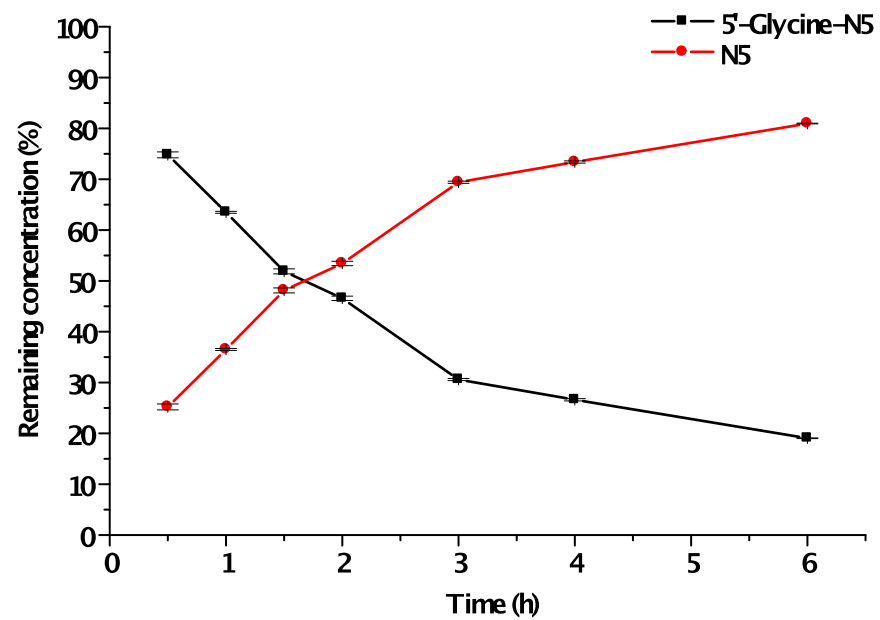

5'-L-Glutam-5-yl-3-(5-{*o*-carboran-1-yl}pentan-1-yl)thymidine (18).

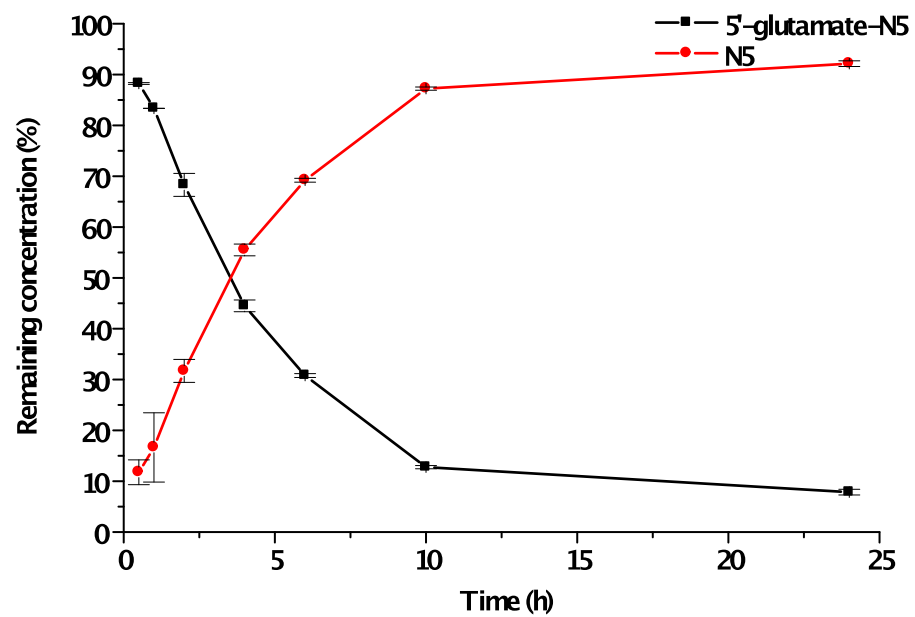

5'-Glyciny-3-[5-(2-{2,3-dihydroxyprop-1-yl}-*o*-carboran-1-yl)pentan-1-yl]thymidine (21).

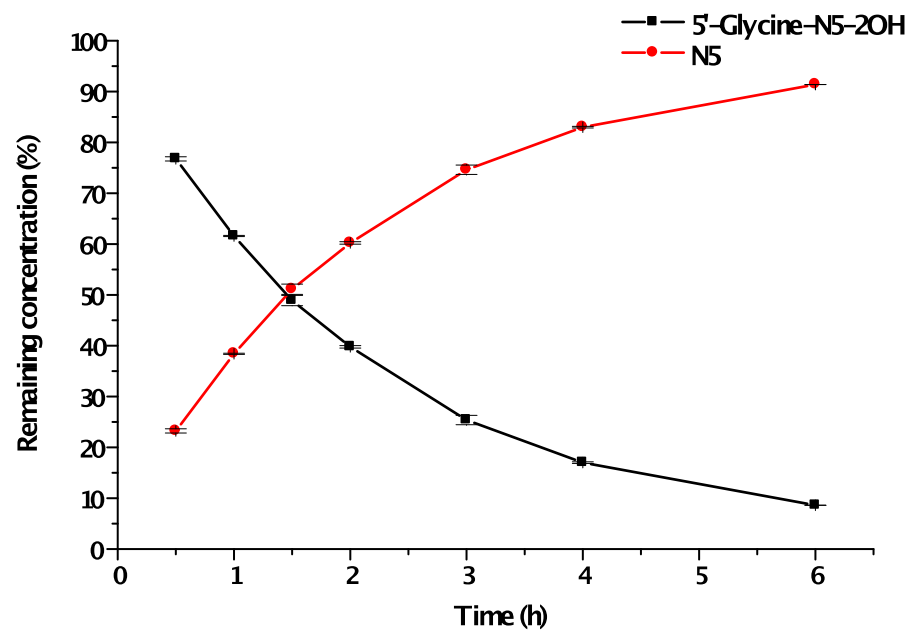

Supplement: NIHMS397933-supplement-01.pdf [file NIHMS397933-supplement-01.pdf]
